# Supplementary material
Source: PubMed Central journal article supplement (PMC9290060)
Supplement: ml2c00124_si_001.pdf [file ml2c00124_si_001.pdf]

# Direct-to-Biology Accelerates PROTAC Synthesis and the Evaluation of Linker Effects on Permeability and Degradation

Charles E. Hendrick<sup>1</sup>, Jeff R. Jorgensen<sup>2</sup>, Charu Chaudhry<sup>2</sup>, Iulia I. Strambeanu<sup>1</sup>, Jean-Francois Brazeau<sup>3</sup>, Jamie Schiffer<sup>4</sup> Jennifer D. Venable<sup>3</sup>, Scott E. Wolkenberg<sup>1</sup>, Zhicai Shi<sup>1</sup>

<sup>1</sup>Discovery Chemistry, Therapeutics Discovery, Janssen Research & Development, LLC, Welsh & McKean Roads, Spring House, Pennsylvania 19477, United States

<sup>2</sup>Discovery Technology and Molecular Pharmacology, Therapeutics Discovery, Janssen Research & Development, LLC, Welsh & McKean Roads, Spring House, Pennsylvania 19477, United States

<sup>3</sup>Discovery Chemistry, Therapeutics Discovery, Janssen Research & Development, LLC, 3210 Merryfield Row, La Jolla, CA 92121

<sup>4</sup>Computational Chemistry, Therapeutics Discovery, Janssen Research & Development, LLC, 3210 Merryfield Row, La Jolla, CA 92121, United States

## Supporting Information

|                                                                                                                                     |          |
|-------------------------------------------------------------------------------------------------------------------------------------|----------|
| <b>I. General Experimental Information .....</b>                                                                                    | <b>3</b> |
| General Information.....                                                                                                            | 3        |
| Materials.....                                                                                                                      | 3        |
| Instrumentation.....                                                                                                                | 3        |
| Computation .....                                                                                                                   | 4        |
| <b>II. General Experimental Protocols .....</b>                                                                                     | <b>4</b> |
| Synthesis of Starting Materials .....                                                                                               | 4        |
| General Procedure A: Experimental Method for Direct-to-Biology Sequence.....                                                        | 6        |
| <i>Coupling of E3-ligase Ligand Moiety to mono-Boc Diamine Library to Afford Boc-protected E3-ligase-Ligand Linker-Amines .....</i> | <i>6</i> |
| <i>Boc Deprotection of Amide Intermediates.....</i>                                                                                 | <i>6</i> |
| <i>JQ1 Moiety Coupling to E3-ligase-Ligand Linker-Amine TFA salts .....</i>                                                         | <i>7</i> |
| <i>Table S1. Select Examples of Product Purity .....</i>                                                                            | <i>7</i> |
| <i>Figure S1. UPLC Traces of Select D2B Synthesis Samples.....</i>                                                                  | <i>7</i> |
| <b>III. Chemistry Optimization Data.....</b>                                                                                        | <b>8</b> |
| HTE Screening Procedure for NHS-Ester Coupling Optimization.....                                                                    | 9        |
| <i>Table S2. Optimization Data for JQ1-NHS ester Coupling.....</i>                                                                  | <i>9</i> |

|                                                                                                                 |           |
|-----------------------------------------------------------------------------------------------------------------|-----------|
| <i>Figure S2. Bar chart of JQ1-NHS ester coupling optimization results.</i> .....                               | 10        |
| Pilot Study Procedure for Direct-to-Biology Sequence .....                                                      | 10        |
| <i>Table S3. Results of tDHU-NHS amine coupling with and without scavenging</i> .....                           | 11        |
| <i>Figure S3. Bar graph of D2B Pilot Study Product Formation</i> .....                                          | 11        |
| <i>Figure S4. Stacked bar graph of relative purity after tDHU-NHS coupling step</i> .....                       | 12        |
| <i>Table S4. Pilot D2B Results for JQ1-NHS ester coupling step with and without Scavenging.</i> .....           | 13        |
| <i>Figure S5. Bar graph of product vs. internal standard before and after scavenging</i> .....                  | 14        |
| <i>Figure S6. Stacked bar-graph showing relative purity of product before and after scavenging.</i> .....       | 14        |
| <b>IV. Property Trends Observed from D2B Library Data</b> .....                                                 | <b>15</b> |
| <i>Figure S7. Box plots representing RBA versus H-Bond acceptor count, H-Bond donor count, and clogD.</i> ..... | 15        |
| <b>V. Product Synthesis and Characterization</b> .....                                                          | <b>15</b> |
| General Procedure B: Library Synthesis of Degraders using NHS-Esters.....                                       | 15        |
| <i>Synthesis of Stock Solution of O-Pom-NHS (4)</i> .....                                                       | 15        |
| <i>Synthesis of Stock Solution of tDHU-NHS (5)</i> .....                                                        | 16        |
| <i>Synthesis of Degraders</i> .....                                                                             | 16        |
| Product Characterization of Select Purified Validation Compounds .....                                          | 17        |
| <b>VI. Assay Experimental Procedures</b> .....                                                                  | <b>28</b> |
| BRD4-HiBiT and CellTiterGlo assays: .....                                                                       | 28        |
| CRBN-tracer NanoBRET assay:.....                                                                                | 29        |
| <i>Generation of assay ready cells:</i> .....                                                                   | 29        |
| <i>Running the CRBN-tracer nanoBRET assay:</i> .....                                                            | 29        |
| <i>Table S5. Performance statistics of assays evaluated in D2B workflow</i> .....                               | 30        |
| <b>VII. NMR Spectra</b> .....                                                                                   | <b>31</b> |
| <b>VIII. References</b> .....                                                                                   | <b>63</b> |
| <b>IX. D2B Synthesis Data and Linker Tables</b> .....                                                           | <b>64</b> |
| CAD Quantification Tables .....                                                                                 | 64        |
| <i>Table S6. O-Pom Plate 1 CAD Results</i> .....                                                                | 64        |
| <i>Table S7. O-Pom Plate 2 CAD Results</i> .....                                                                | 66        |
| <i>Table S8. tDHU Plate 1 CAD Results</i> .....                                                                 | 68        |
| <i>Table S9. tDHU Plate 2 CAD Results</i> .....                                                                 | 70        |
| <i>Table S10. Results of D2B Synthesis by N-Boc-diamine linker</i> .....                                        | 72        |

## I. General Experimental Information

**General Information.** Reactions were performed in standard lab glassware or disposable borosilicate vials with stirring without exclusion of air. Direct-to-Biology experiments were performed in aluminum 96-position reactor blocks filled with 1 mL borosilicate vials containing 4.80 mm parylene coated magnetic stir bars and sealed with a film of PFA supported by a rubber mat and an aluminum backed screw-down plate cap, while stirring and heating were achieved by tumble stirring (V&P Scientific Magnetic Tumble Stirrer, 500 rpm) and heating on a temperature-controlled heating block. Solid dosing of resins was generally achieved using a 96-well plate formatted volumetric solid dispensing plate, approximate masses dosed for specific resins employed were calibrated and used without correction. Filtration was achieved using 96-well plate format PTFE filter plates (0.4 micron) and eluted under vacuum pressure. Liquid dispensing was achieved using standard single channel and multi-channel pipettes without additional calibration. Slurry transfer was achieved in parallel using a multi-channel pipette and clipped pipette tips to permit transfer of heterogenous mixtures. Purified compounds were obtained in >95% purity, as assessed by UPLC-MS and/or <sup>1</sup>H NMR, unless otherwise indicated.

**Materials.** Commercially available starting materials and mono-Boc-diamine building blocks were purchased and used as received without further purification. Resin-bound scavengers MP-Trisamine and PS-Isocyanate were purchased from Biotage and used as received. DMF and DMSO were used from freshly unsealed anhydrous bottles. An authentic sample of dBet1 was purchased commercially and used as received.

**Instrumentation.** Analytical samples were performed on a Waters Acquity I-Class Ultra-High Pressure Liquid Chromatography-Mass Spec with a PDA detector and SQD2 mass-detection (ESI-pos/neg). Charged-Aerosol Detection was performed using a Waters Acquity I-Class UPLC-MS equipped with PDA and SQD2 detectors (ESI positive ionization mode); column: Waters CSH C18, 2.1mm x 50 mm (Waters # 186006101) with Waters ACQUITY UPLC Col. In-Line Filter Kit (Waters #205000343); Mobile Phase A: 0.1 % trifluoroacetic acid in MilliQ water, Mobile Phase B: 0.1% trifluoroacetic acid in Optima grade Acetonitrile. Corona Aerosol Detection (CAD) analysis was conducted with Thermo Corona™ Veo™ RS Charged Aerosol Detector. The flow rate was 2 mL/min using a gradient from 5-100% Acetonitrile over 2 minutes. The total run time for each injection was 2.3 minutes. Purification was performed using a Waters mass-triggered liquid chromatography using Waters XSelect CSH (C18, 5u, 19x100 mm) or Waters XBridge BEH (C18, 5u, 19x100 mm) reversed-phase columns and appropriate linear gradients of increasing concentration of acetonitrile in water, 0.1% TFA or FA. Fractions containing the desired product were combined and concentrated by centrifuge evaporation. High-throughput NMR data were collected using a Bruker AVANCE III HD solution-state NMR spectrometer equipped with a room temperature 1 mm TXI Microprobe at 400 MHz proton frequency at 298 K. The pulse sequence used was a one-dimensional (1D) proton experiment with water presaturation (zgpr). The acquisition time was 2.04 s using 32768 points for 20 ppm sweep width. The number of scans collected for each sample was determined based on its estimated weight. NMR data are represented as follows: chemical shift, multiplicity (s = singlet, d = doublet, t = triplet, q = quartet, quin = quintet, m = multiplet, br = broad), coupling constant (Hz), and integration.

**Computation.** Calculated properties for molecular weight, formula, rotatable bonds were obtained from RDKit: Open Source Cheminformatics or analogous internal calculators. Calculated values for logD were obtained using BIOVIA, Dassault Systèmes, PipelinePilot, 21.2.100.53. Topological diameter was calculated using methods available in Schrödinger (Release 2020: Maestro, Schrödinger, LLC, New York, NY, 2021).

## II. General Experimental Protocols

### Synthesis of Starting Materials

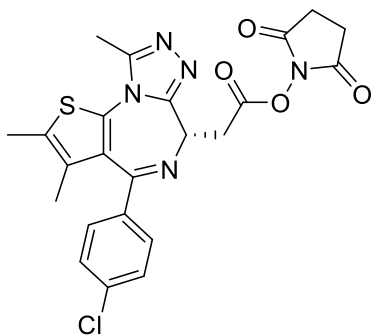

### 2,5-dioxopyrrolidin-1-yl-(S)-2-(4-(4-chlorophenyl)-2,3,9-trimethyl-6H-thieno[3,2-f][1,2,4]triazolo[4,3-a][1,4]diazepin-6-yl)acetate (3)

A 40 mL vial was charged with (S)-2-(4-(4-chlorophenyl)-2,3,9-trimethyl-6H-thieno[3,2-f][1,2,4]triazolo[4,3-a][1,4]diazepin-6-yl)acetic acid (801 mg, 2.00 mmol, 1 equiv), *N*-hydroxysuccinimide (258 mg, 2.20 mmol, 1.1 equiv), DMAP (17 mg, 0.14 mmol, 0.07 equiv), and DCC Resin (3.60 g, [1.39 mmol/g], 5.00 mmol, 2.5 equiv), then DMF (13.3 mL) was added and the resulting slurry was agitated by stir bar until all acid starting material was observed to be dissolved and then allowed to stand at room temperature with occasional mixing so as to not degrade the resin. After 24 hours the reaction was diluted with ethyl acetate (10 mL) and the resin was removed by vacuum filtration through a pad of celite, washing with ethyl acetate (65 mL). The filtrate was further diluted in ethyl acetate (50 mL) and washed with a 1:1 brine/DI water solution (60 mL), the aqueous phase back extracted with ethyl acetate (2 x 60 mL), and the combined organic layers washed, sequentially, with DI water (4 x 60 mL), sat. NaHCO<sub>3</sub> (2 x 60 mL), and brine (60 mL) before drying over Na<sub>2</sub>SO<sub>4</sub>, filtering by vacuum filtration, and concentrating by rotary evaporation. The resulting solid was further dried by Genevac at high vacuum to afford the title compound (946 mg, 85%, purity 91%). <sup>1</sup>H NMR (400 MHz, DMSO) δ 7.50 (s, 4H), 4.61 (dd, J = 7.8, 6.6 Hz, 1H), 3.79 – 3.72 (m, 2H), 2.88 (d, J = 20.8 Hz, 4H), 2.63 (s, 3H), 2.42 (s, 3H), 1.63 (s, 3H). <sup>13</sup>C NMR (101 MHz, DMSO) δ 170.1, 166.8, 163.7, 154.0, 150.1, 136.6, 135.4, 132.5, 130.8, 130.4, 129.9, 129.4, 128.4, 53.3, 33.9, 25.5, 14.0, 12.7, 11.3. HRMS-ESI (m/z) Calcd for (C<sub>23</sub>H<sub>21</sub>ClN<sub>5</sub>O<sub>4</sub>S) ([M+H]<sup>+</sup>): 498.0997; found: 498.1003.

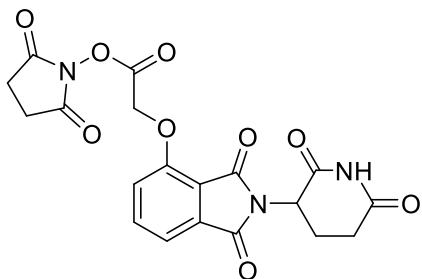

**2,5-dioxopyrrolidin-1-yl 2-((2-(2,6-dioxopiperidin-3-yl)-1,3-dioxoisindolin-4-yl)oxy)acetate (4).<sup>1</sup>**

To a 40 mL vial add 2-((2-(2,6-dioxopiperidin-3-yl)-1,3-dioxoisindolin-4-yl)oxy)acetic acid (300 mg, 0.90 mmol, 1 equiv), *N*-hydroxysuccinimide (116 mg, 1.76 mmol, 1.1 equiv), and DMAP (29 mg, 0.24 mmol, 0.15 equiv) and dissolve in DMF (5.0 mL) then cool by ice/water batch with stirring for at least 15 minutes. Once cooled, a slurry of EDCI (376 mg, 1.92 mmol, 1.2 equiv) in DMF (3.5 mL) was added in small portions of approx. 0.3 mL every 30 seconds until complete addition to the reaction mixture and, remaining in the ice bath, the mixture was permitted to slowly warm to room temperature overnight. The reaction was then diluted in ethyl acetate (150 mL) and washed with a 1:1 brine/DI water mixture (90 mL), the aqueous layer back extracted with ethyl acetate (2 x 60 mL), and the combined organics washed sequentially with DI water (4 x 75 mL), sat. NaHCO<sub>3</sub> (2 x 75 mL), and brine (50 mL) then dried over Na<sub>2</sub>SO<sub>4</sub>, before filtering by vacuum filtration, and concentrating by rotary evaporation. The resulting solid was further dried by Genevac at high vacuum to afford the title compound (283 mg, 41%). <sup>1</sup>H NMR (400 MHz, DMSO, 1H masked by DMSO) δ 11.11 (s, 1H), 7.86 (dd, *J* = 8.5, 7.3 Hz, 1H), 7.52 (dd, *J* = 19.9, 7.9 Hz, 2H), 5.66 (s, 2H), 5.11 (dd, *J* = 12.8, 5.4 Hz, 1H), 2.83 (s, 4H), 2.70 – 2.51 (m, 2H), 2.05 (ddd, *J* = 13.6, 6.3, 3.9 Hz, 1H). LCMS-ESI (*m/z*) Expected (C<sub>19</sub>H<sub>16</sub>N<sub>3</sub>O<sub>9</sub>) ([*M*+*H*]<sup>+</sup>): 430.1; observed: 429.9.

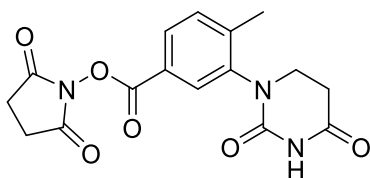

**2,5-dioxopyrrolidin-1-yl 3-(2,4-dioxotetrahydropyrimidin-1(2*H*)-yl)-4-methylbenzoate (5).**

A 40 mL vial was charged with 3-(2,4-dioxotetrahydropyrimidin-1(2*H*)-yl)-4-methylbenzoic acid (500 mg, 2.01 mmol, 1 equiv)<sup>2</sup>, *N*-hydroxysuccinimide (260 mg, 2.22 mmol, 1.1 equiv), DMAP (17 mg, 0.14 mmol, 0.07 equiv), and DCC Resin (3.62 g, [1.39 mmol/g], 5.04 mmol, 2.5 equiv), then DMF (13.4 mL) was added and the resulting slurry was agitated by stir bar until all acid starting material was observed to be dissolved and then allowed to stand at room temperature with occasional mixing so as to not degrade the resin. After 24 h the reaction was filtered through a pad of celite by vacuum filtration, rinsing with copious DCM, then further diluted to a total volume of 500 mL DCM before extracting sequentially with brine (100 mL), sat. NaHCO<sub>3</sub> (2 x 100 mL), DI water (2 x 100 mL), and again with brine (50 mL) then dried over Na<sub>2</sub>SO<sub>4</sub>, before filtering by vacuum filtration, and concentrating by rotary evaporation. The resulting solid was further dried by Genevac at high vacuum to afford the title compound (636 mg, 91%). <sup>1</sup>H NMR (400 MHz, DMSO) δ 10.45 (s, 1H), 8.04 (d, *J* = 1.9 Hz, 1H), 7.96 (dd, *J* = 8.0, 1.9 Hz, 1H), 7.59 (d, *J* = 8.1 Hz, 1H), 3.87 (ddd, *J* = 12.1, 9.5, 5.3 Hz, 1H), 3.58 (dt, *J* = 12.0, 5.9 Hz, 1H), 2.90 (s,

4H), 2.75 (dtd,  $J = 16.7, 11.2, 10.2, 6.0$  Hz, 2H), 2.33 (s, 3H).  $^{13}\text{C}$  NMR (101 MHz, DMSO)  $\delta$  170.7, 170.3, 161.2, 151.9, 144.7, 141.8, 131.9, 129.2, 128.9, 123.1, 44.3, 31.0, 25.5, 18.0. HRMS-ESI ( $m/z$ ) Calcd for ( $\text{C}_{16}\text{H}_{16}\text{N}_3\text{O}_6$ ) ( $[\text{M}+\text{H}]^+$ ): 346.1034; found: 346.140.

### General Procedure A: Experimental Method for Direct-to-Biology Sequence

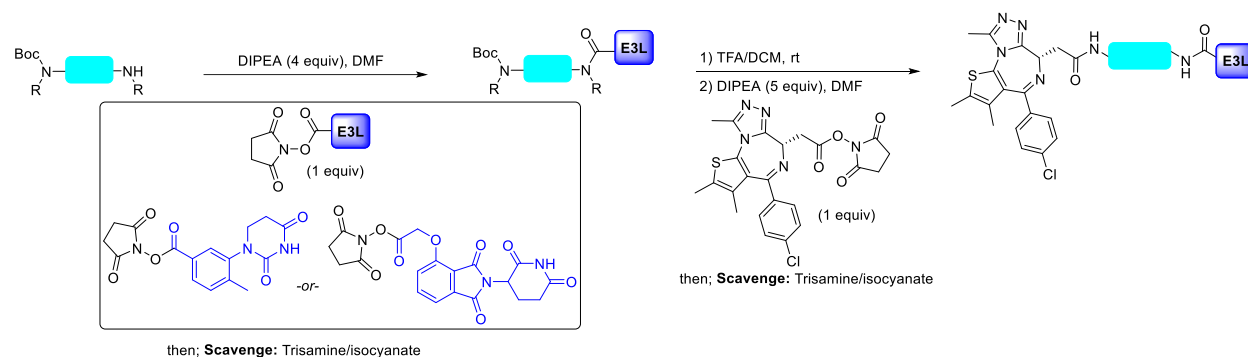

#### Coupling of E3-ligase Ligand Moiety to mono-Boc Diamine Library to Afford Boc-protected E3-ligase-Ligand Linker-Amines

A 96-position aluminum reaction plate was loaded with 1 mL vials containing a stir bar and a pre-dispensed array of 91 unique *N*-Boc-diamines (6  $\mu\text{mol}$ , 1.2 equiv) with 5 blank positions reserved for controls. A stock solution was generated and dosed to each vial by multi-channel pipette as E3-ligase (5  $\mu\text{mol}$ , [0.1], 1 equiv) and DIPEA (3.45  $\mu\text{L}$ , 20  $\mu\text{mol}$ , 4 equiv) in DMF (50  $\mu\text{L}$ ). The plate was then sealed and either heated to 60  $^{\circ}\text{C}$  for 16 h (tDHU-NHS) or at 40  $^{\circ}\text{C}$  for 4 h with stirring before cooling to room temperature. The plate was unsealed, and using a solid-dispensing dropper plate, approx. 20 mg of MP-trisamine resin then approx. 20 mg PS-isocyanate resin were added to each vial before a multi-channel pipette was used to add an additional portion of DMF (50  $\mu\text{L}$ ), the plate re-sealed then stirred at room temperature for at least 5 hours. Vacuum filtration through a 0.4 micron filter plate was achieved using liquid transfer by multi-channel pipette, with pipette tips cut to prevent clogging, and rinsing with DMF (2 x 150  $\mu\text{L}$ ). The scavenged mixtures were concentrated by Genevac to afford the Boc-protected intermediates which were carried forward without further purification.

#### Boc Deprotection of Amide Intermediates

A 96-position aluminum reaction plate racked with vials containing the crude *N*-Boc-protected intermediates and a stir bar was dosed with DCM (10  $\mu\text{L}$ ) followed by TFA (40  $\mu\text{L}$ ), sealed, and

stirred at room temperature for 2 hours before unsealing and drying by Genevac\* to remove volatiles. Resulting crude salts were carried forward without further manipulation.

#### *JQ1 Moiety Coupling to E3-ligase-Ligand Linker-Amine TFA salts*

A stock solution of JQ1-NHS ester (5  $\mu\text{mol}$ , 1 equiv) and DIPEA (25  $\mu\text{mol}$ , 5 equiv) in DMF (50  $\mu\text{L}$ ) was then added to the crude TFA amine salts, the plate sealed, and the resulting mixtures placed on 40 °C heat with stirring for 16 hours before removing from heat and cooling to room temperature. The plate was unsealed, and using a solid-dispensing dropper plate, approx. 20 mg of MP-trisamine resin then approx. 20 mg PS-isocyanate resin were added to each vial before a multi-channel pipette was used to add an additional portion of DMF (50  $\mu\text{L}$ ), the plate re-sealed then stirred at room temperature for at least 5 hours before vacuum filtration through a 0.4 micron filter plate, rinsing with DMF (2 x 150  $\mu\text{L}$ ) and concentrated and dried by Genevac to afford the crude product residue. The crude material was solubilized in DMSO (250  $\mu\text{L}$ ) to afford at stock solution of maximally 20 mM concentration, an aliquot (5  $\mu\text{L}$ ) removed for quantification by CAD, and the remainder reserved for assay plating. Yield determination for each well was determined by CAD, against a calibration curve with noscopine, to determine the actual concentration of product in each well and dividing by the theoretical concentration for the reaction sequence.

\* Though the TFA/DCM mixture was typically removed within a few hours, thorough drying on high BP setting overnight was required to remove residual TFA.

*Table S1. Select Examples of Product Purity*

| Coords. | Mass Expected | Product mg/mL | CAD Yield | Rt (min) | UV215 Area% |
|---------|---------------|---------------|-----------|----------|-------------|
| D03     | 832.2         | 0.622         | 41%       | 0.865    | 92.22       |
| E04     | 822.2         | 0.509         | 34%       | 0.848    | 88.48       |
| C01     | 846.2         | 0.314         | 20%       | 0.879    | 60.55       |
| D08     | 824.3         | 0.045         | 3%        | 0.896    | 29.33       |

*Figure S1. UPLC Traces of Select D2B Synthesis Samples*

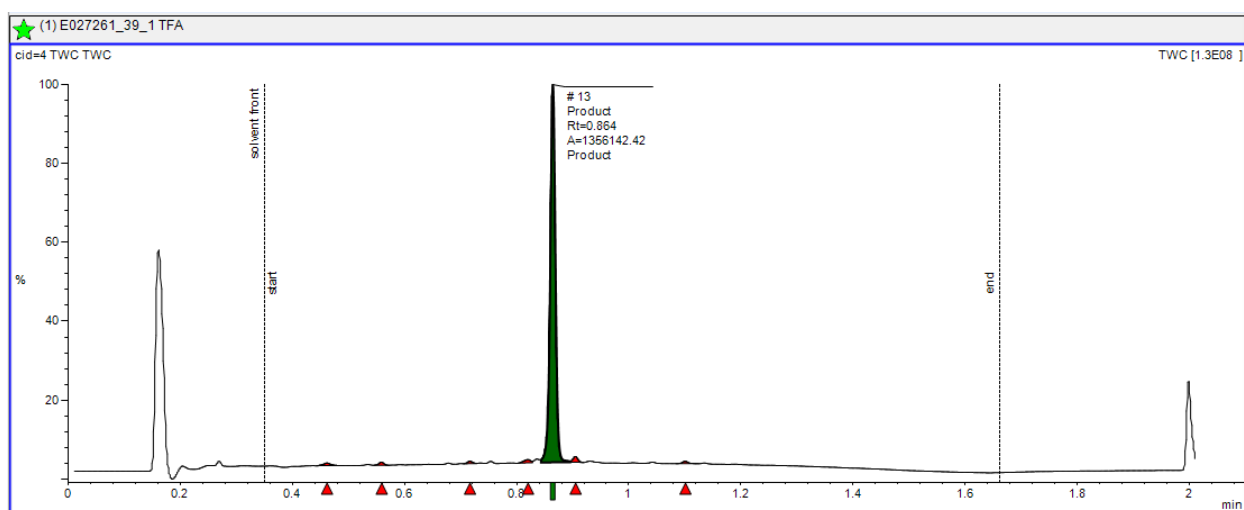

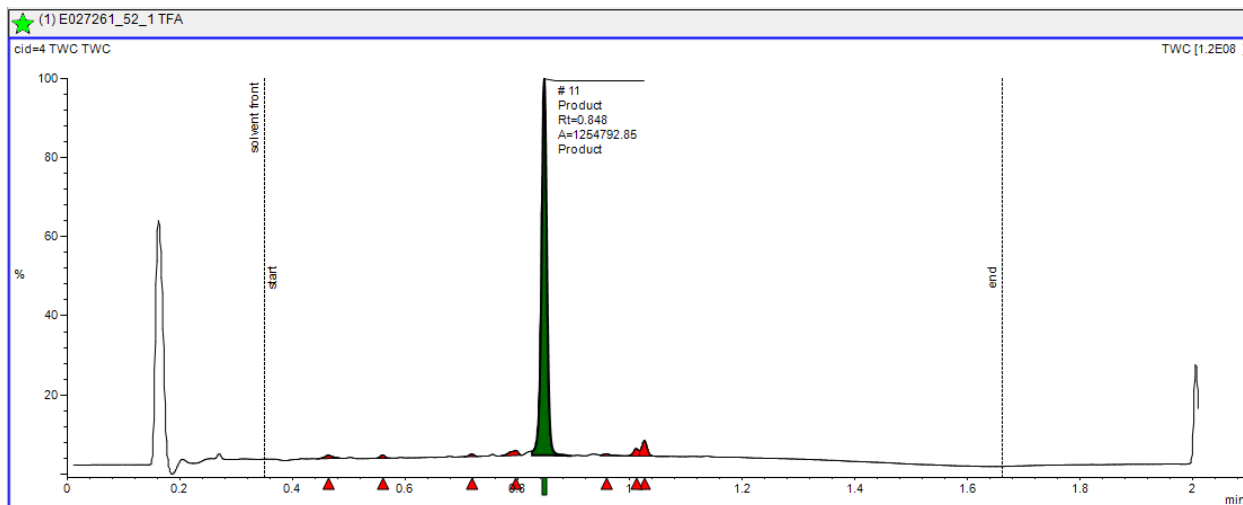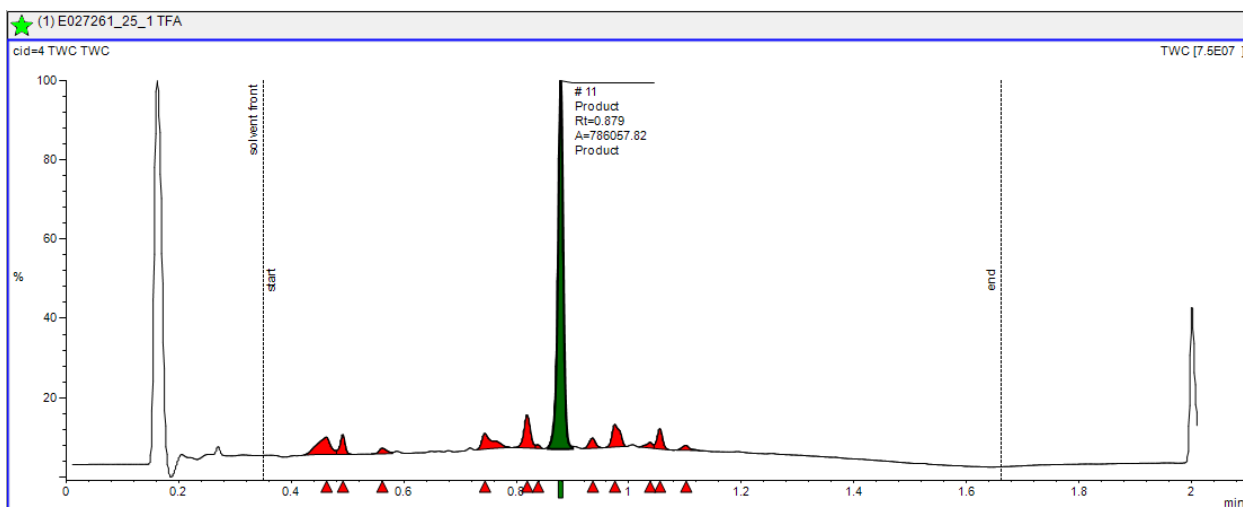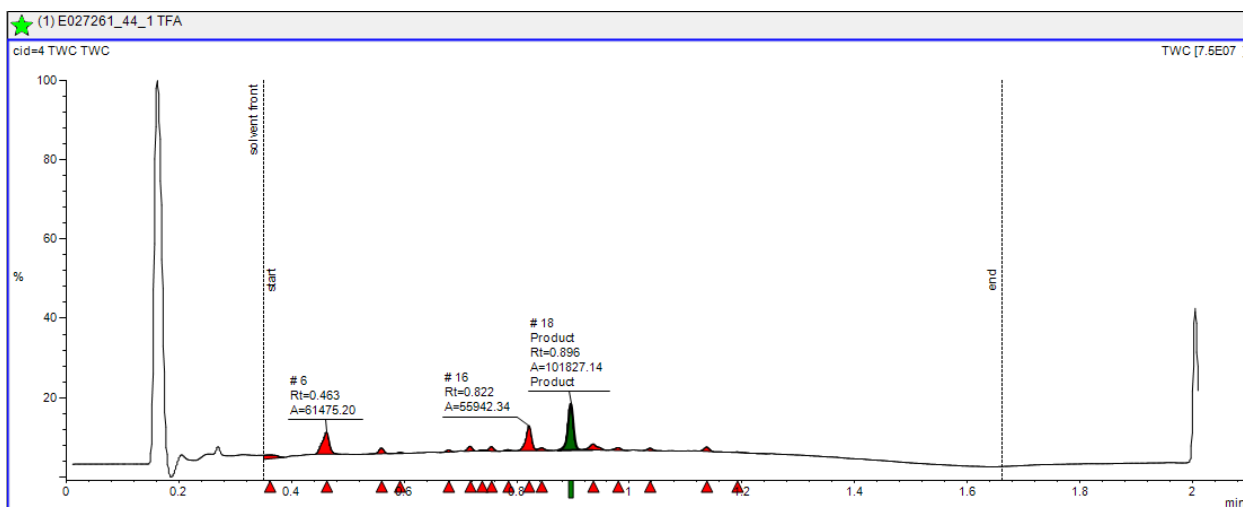

### III. Chemistry Optimization Data



## HTE Screening Procedure for NHS-Ester Coupling Optimization

A 24-vial aluminum reaction screening block with 1 mL vials was charged with a stock solution of the indicated amine to each well in DMF (5.5  $\mu\text{mol}$ , 12.5  $\mu\text{L}$ , [0.44], 1.1 equiv) followed by JQ1-NHS ester **3** in DMF (5  $\mu\text{mol}$ , 12.5  $\mu\text{L}$ , [0.2], 1 equiv). To the indicated wells was then added the additive as either a stock solution or slurry in DMF (12.5  $\mu\text{L}$ ) followed by the indicated base as either a stock solution or slurry (10  $\mu\text{mol}$ , 2 equiv) and the plate was sealed and stirred at room temperature for 16 h before unsealing and quenching with a solution of Ph<sub>3</sub>N in MeCN/DMSO (250  $\mu\text{L}$ , [0.002], 3:1). The crude mixtures were mixed vigorously and aliquots were removed (25  $\mu\text{L}$ ) for UPLC-MS analysis.

Table S2. Optimization Data for JQ1-NHS ester Coupling

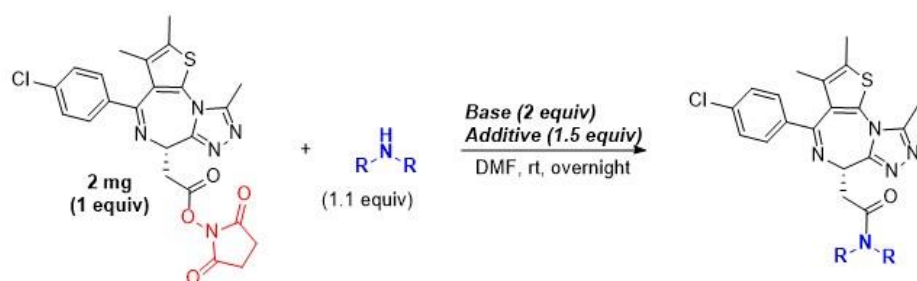

### Amine Substrates

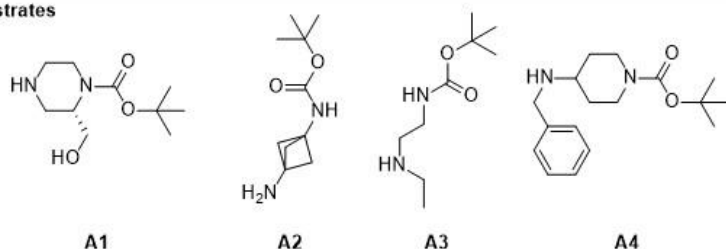

| Substrate | Base                            | Additive | Prod./IS | SM1/IS | JQ1-CO <sub>2</sub> H/IS |
|-----------|---------------------------------|----------|----------|--------|--------------------------|
| A1        | DIPEA                           | none     | 14.02    | 0.00   | 0.35                     |
| A1        | DIPEA                           | DMAP     | 13.40    | 0.00   | 0.36                     |
| A1        | DIPEA                           | Si-DMAP  | 12.08    | 0.00   | 0.36                     |
| A1        | Cs <sub>2</sub> CO <sub>3</sub> | none     | 9.50     | 0.00   | 1.38                     |
| A1        | Cs <sub>2</sub> CO <sub>3</sub> | DMAP     | 10.08    | 0.00   | 1.44                     |
| A1        | Cs <sub>2</sub> CO <sub>3</sub> | Si-DMAP  | 10.51    | 0.00   | 0.91                     |
| A2        | DIPEA                           | none     | 12.63    | 0.00   | 0.35                     |
| A2        | DIPEA                           | DMAP     | 12.13    | 0.00   | 0.34                     |
| A2        | DIPEA                           | Si-DMAP  | 11.13    | 0.00   | 0.29                     |
| A2        | Cs <sub>2</sub> CO <sub>3</sub> | none     | 9.76     | 0.00   | 2.21                     |
| A2        | Cs <sub>2</sub> CO <sub>3</sub> | DMAP     | 10.79    | 0.00   | 1.42                     |
| A2        | Cs <sub>2</sub> CO <sub>3</sub> | Si-DMAP  | 10.32    | 0.00   | 1.02                     |

|    |                                 |         |       |       |       |
|----|---------------------------------|---------|-------|-------|-------|
| A3 | DIPEA                           | none    | 11.18 | 2.27  | 0.70  |
| A3 | DIPEA                           | DMAP    | 10.51 | 0.49  | 2.19  |
| A3 | DIPEA                           | Si-DMAP | 8.75  | 0.00  | 0.53  |
| A3 | Cs <sub>2</sub> CO <sub>3</sub> | none    | 9.14  | 0.00  | 2.84  |
| A3 | Cs <sub>2</sub> CO <sub>3</sub> | DMAP    | 9.41  | 0.00  | 2.40  |
| A3 | Cs <sub>2</sub> CO <sub>3</sub> | Si-DMAP | 3.58  | 0.00  | 2.72  |
| A4 | DIPEA                           | none    | 0.60  | 10.66 | 1.73  |
| A4 | DIPEA                           | DMAP    | 0.68  | 0.47  | 11.67 |
| A4 | DIPEA                           | Si-DMAP | 0.31  | 4.17  | 2.13  |
| A4 | Cs <sub>2</sub> CO <sub>3</sub> | none    | 5.73  | 0.00  | 5.45  |
| A4 | Cs <sub>2</sub> CO <sub>3</sub> | DMAP    | 6.41  | 0.00  | 4.71  |
| A4 | Cs <sub>2</sub> CO <sub>3</sub> | Si-DMAP | 0.21  | 0.00  | 4.47  |

Figure S2. Bar chart of JQ1-NHS ester coupling optimization results.

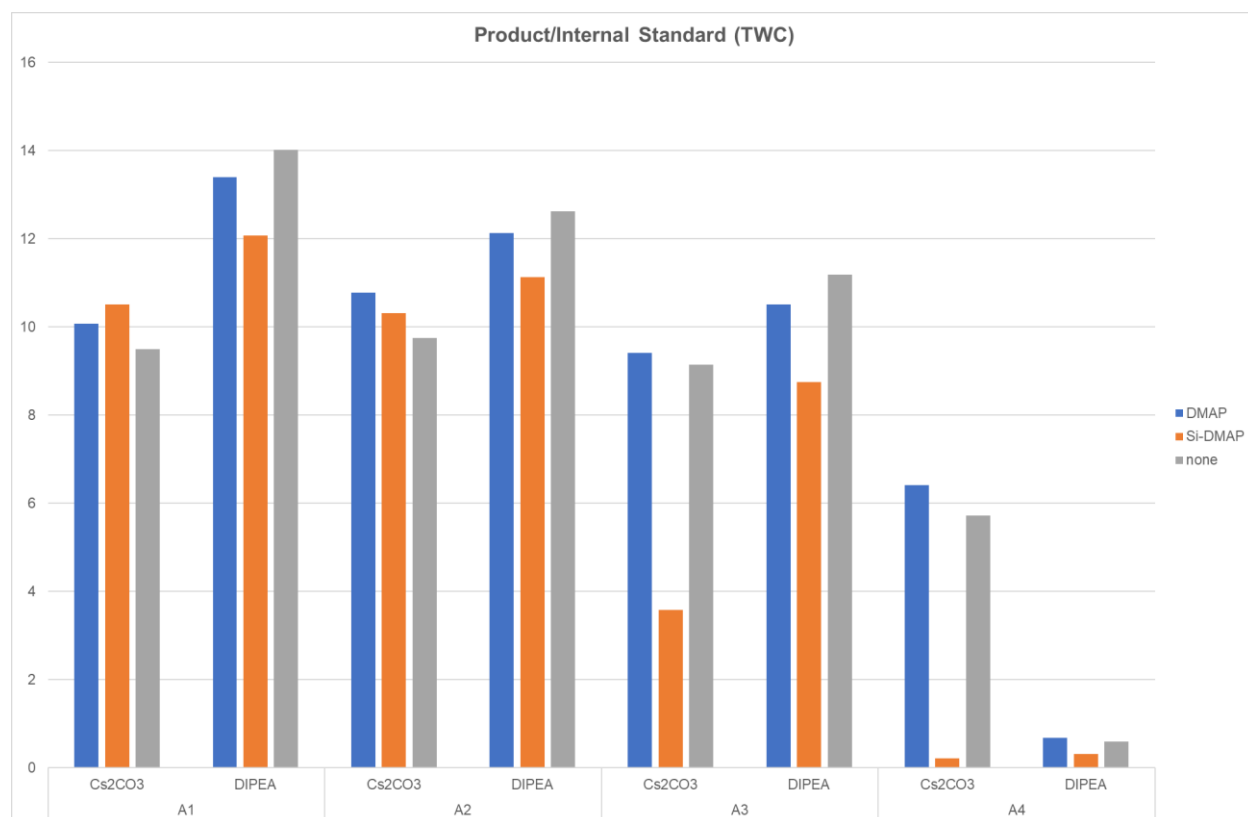

## Pilot Study Procedure for Direct-to-Biology Sequence

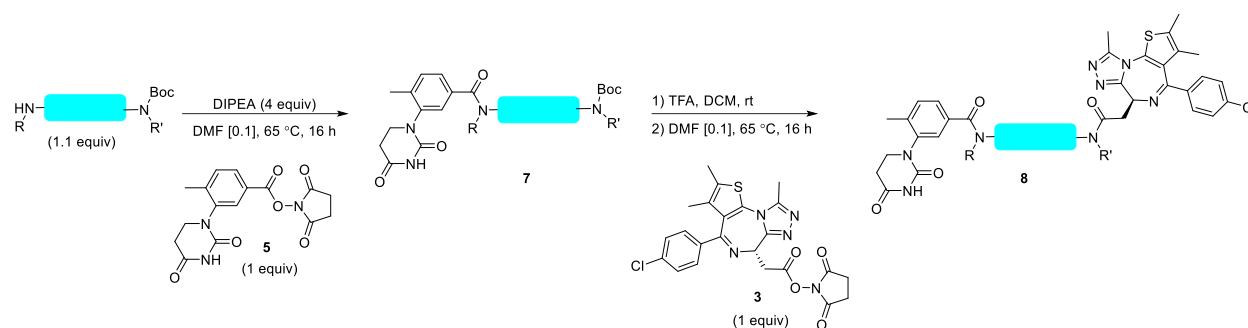

A 24-vial aluminum reaction screening block with 1 mL vials was charged with a stock solution of the indicated amine in DMF (5.5  $\mu\text{mol}$ , 28  $\mu\text{L}$ , [0.2], 1.1 equiv) followed by either JQ1-NHS ester **3** in DMF (5  $\mu\text{mol}$ , 25  $\mu\text{L}$ , [0.2], 1 equiv), or tDHU-NHS ester **5** in DMF (5  $\mu\text{mol}$ , 25  $\mu\text{L}$ , [0.2], 1 equiv) then DIPEA (3.5  $\mu\text{L}$ , 4 equiv) before sealing the plate, stirring at 65 °C for 16 h, and cooling to room temperature. An aliquot was removed for pre-scavenger analysis, then to the indicated wells was added MP-Trisamine resin (approx. 20 mg) and PS-isocyanate resin (approx. 20 mg) followed by additional DMF (150  $\mu\text{L}$ ) and the resulting slurry stirred at room temperature for 4 hours before removing the resin by vacuum filtration, washing with DMF (2 x 150  $\mu\text{L}$ ), removing an aliquot for analysis, transferring to clean 1 mL vials, and concentrating by Genevac to afford the crude Boc-protected amine intermediate which was carried forward without further purification.

Table S3. Results of tDHU-NHS amine coupling with and without scavenging

| Amine            | Product Area | tDHU-NHS Area | IS Area | P/IS | tDHU-NHS/IS |
|------------------|--------------|---------------|---------|------|-------------|
| <b>CRUDE</b>     |              |               |         |      |             |
| 1                | 571778       | 182527        | 601466  | 0.95 | 0.30        |
| 2                | 519705       | 53589         | 606438  | 0.86 | 0.09        |
| 3                | 855200       |               | 603450  | 1.42 | 0.00        |
| 4                | 383613       | 346398        | 603323  | 0.64 | 0.57        |
| 5                | 635491       |               | 602729  | 1.05 | 0.00        |
| 6                | 799539       |               | 548050  | 1.46 | 0.00        |
| <b>SCAVENGED</b> |              |               |         |      |             |
| 1                | 734268       |               | 618621  | 1.19 | 0.00        |
| 2                | 505830       |               | 590482  | 0.86 | 0.00        |
| 3                | 912662       |               | 622034  | 1.47 | 0.00        |
| 4                | 386488       |               | 647899  | 0.60 | 0.00        |
| 5                | 709439       |               | 664493  | 1.07 | 0.00        |
| 6                | 888876       |               | 718373  | 1.24 | 0.00        |

Figure S3. Bar graph of D2B Pilot Study Product Formation

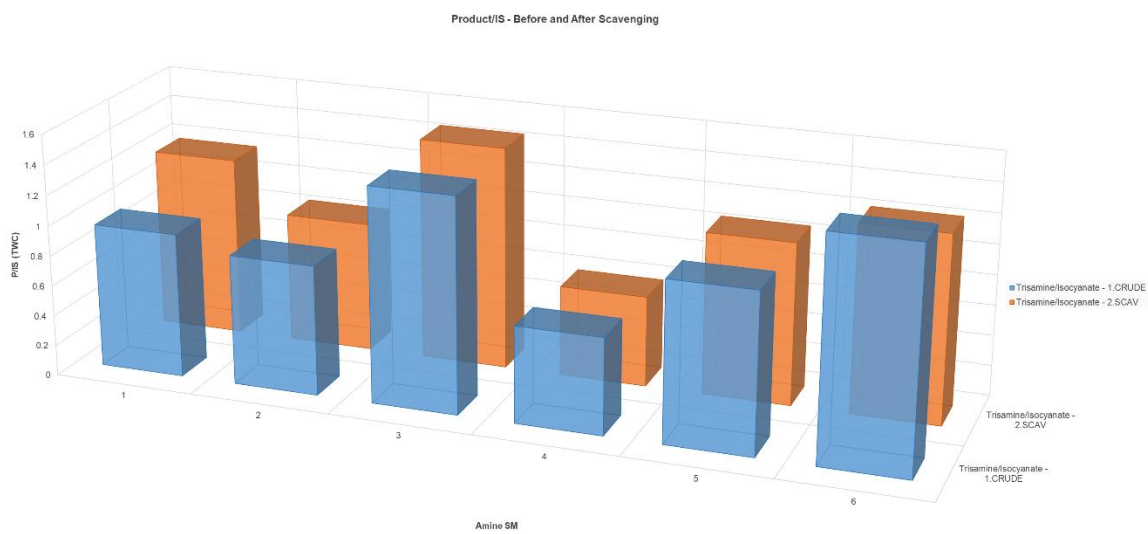

Figure S4. Stacked bar graph of relative purity after tDHU-NHS coupling step

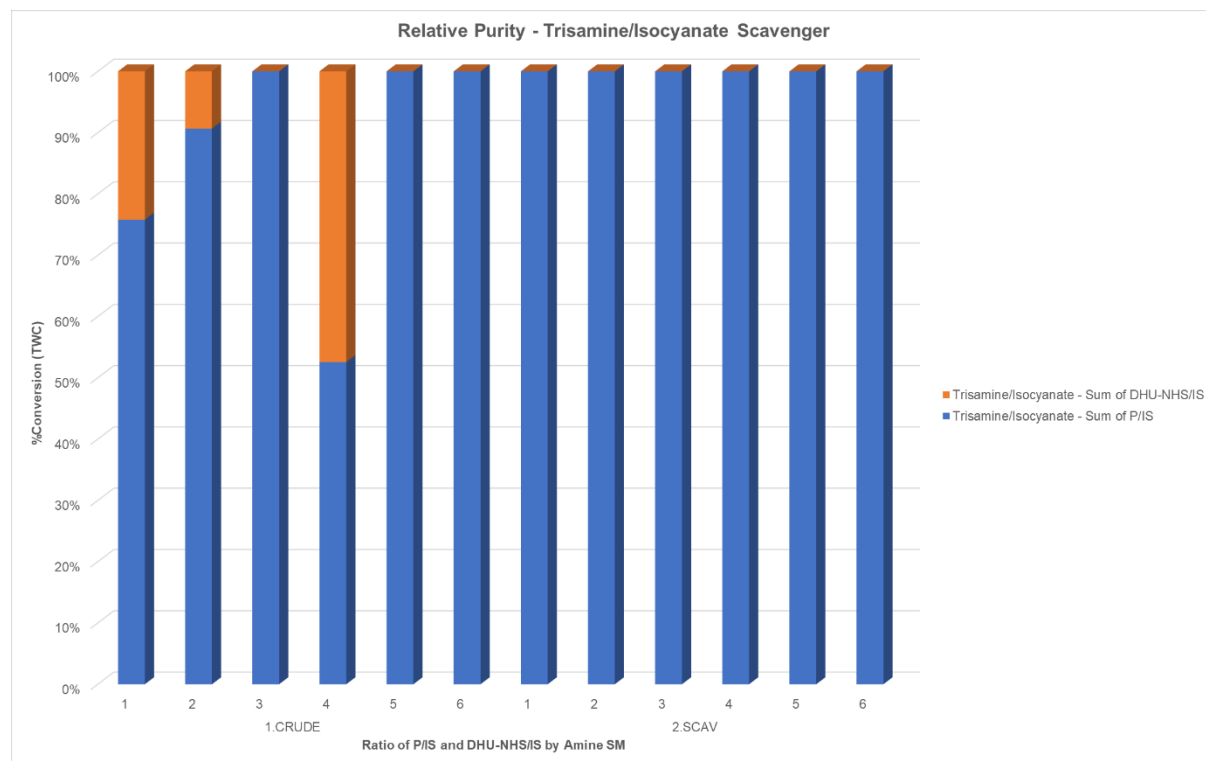

To the vials containing the crude *N*-Boc diamines and charged with a stir bar was added DCM (15  $\mu$ L) followed by TFA (35  $\mu$ L) and the reactions stirred at room temperature for 4 hours before concentrating by Genevac. To the thoroughly dried crude salts was then added a stock solution of either JQ1-NHS ester **3** in DMF (5  $\mu$ mol, 25  $\mu$ L, [0.2], 1 equiv), or tDHU-NHS ester **5** in DMF (5  $\mu$ mol, 25  $\mu$ L, [0.2], 1 equiv) then DIPEA (4.3  $\mu$ L, 5 equiv) before sealing the plate, stirring at 65  $^{\circ}$ C for 16 h, and cooling to room temperature. An aliquot was removed for pre-scavenger analysis, then to the indicated wells was added MP-Trisamine resin (approx. 20 mg) and PS-isocyanate resin (approx. 20 mg) followed by additional DMF (150  $\mu$ L) and the resulting slurry stirred at room temperature for 4 hours before removing an aliquot for analysis.

Table S4. Pilot D2B Results for JQ1-NHS ester coupling step with and without Scavenging.

| Amine            | P/IS | JQ1-CO2H/IS | JQ1-NHS/IS |
|------------------|------|-------------|------------|
| <b>CRUDE</b>     |      |             |            |
| 1                | 2.70 | 0.00        | 0.66       |
| 2                | 2.36 | 0.00        | 0.20       |
| 3                | 3.14 | 0.00        | 0.23       |
| 4                | 1.61 | 0.47        | 1.04       |
| 5                | 2.93 | 0.29        | 0.36       |
| 6                | 2.92 | 0.31        | 0.28       |
| <b>SCAVENGED</b> |      |             |            |
| 1                | 4.01 | 0.00        | 0.00       |
| 2                | 2.34 | 0.00        | 0.00       |
| 3                | 3.40 | 0.00        | 0.00       |
| 4                | 1.69 | 0.39        | 0.00       |
| 5                | 2.97 | 0.25        | 0.00       |
| 6                | 4.59 | 0.43        | 0.00       |

Figure S5. Bar graph of product vs. internal standard before and after scavenging

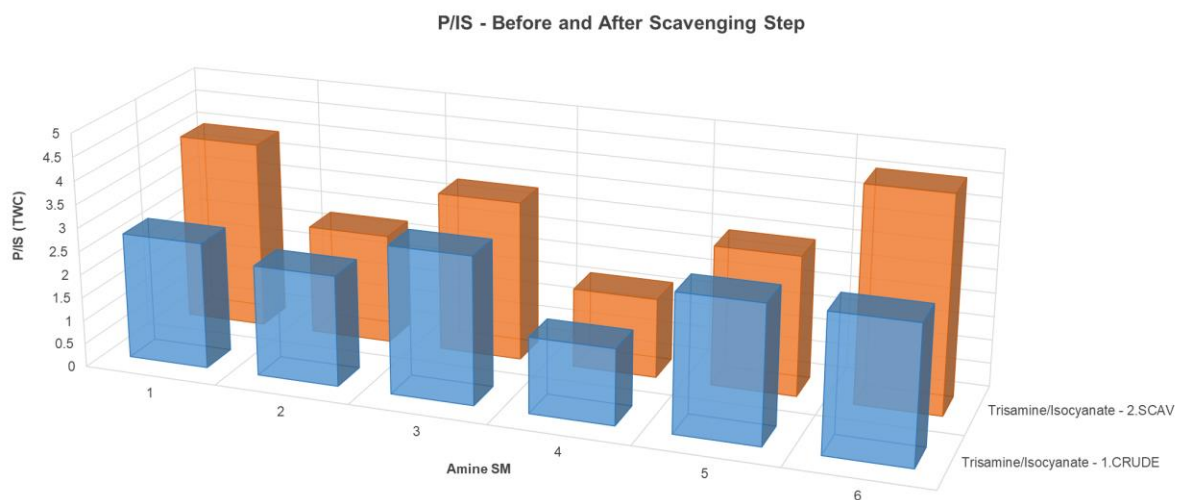

Figure S6. Stacked bar-graph showing relative purity of product before and after scavenging.

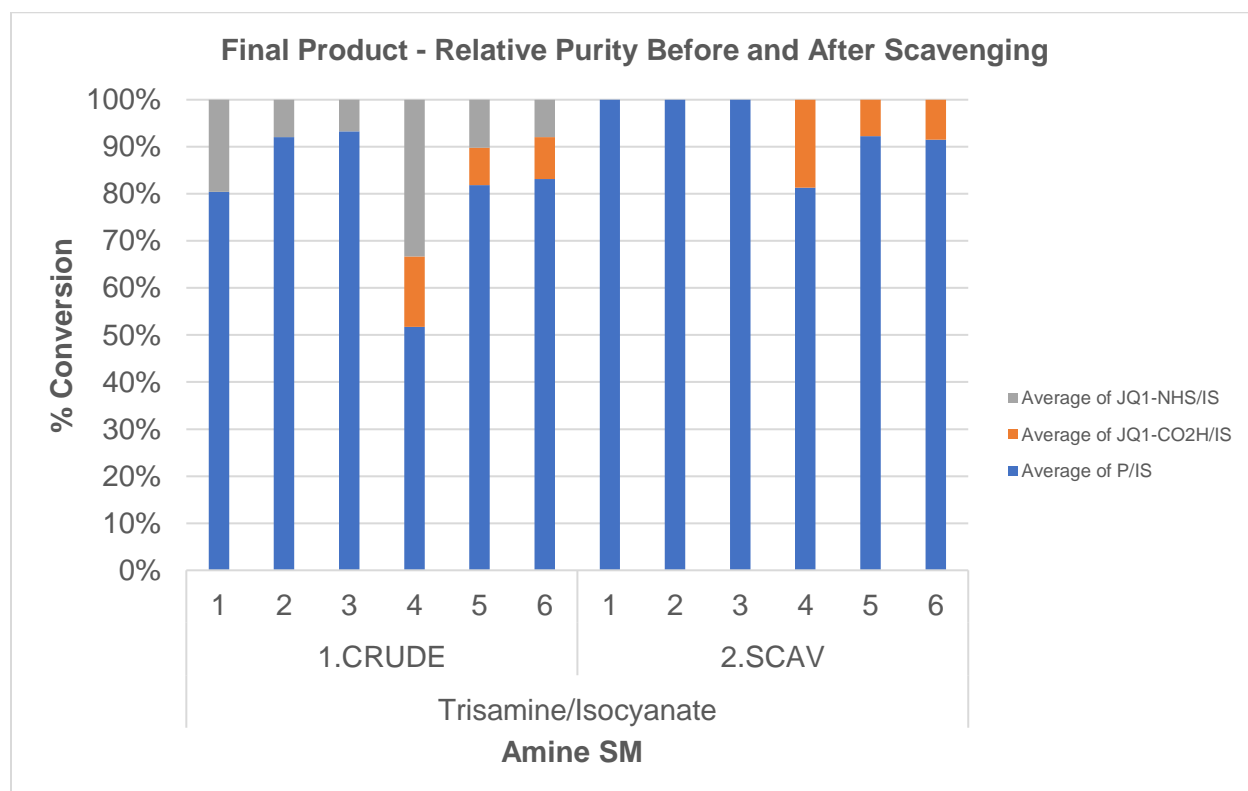

## IV. Property Trends Observed from D2B Library Data

Figure S7. Box plots representing RBA versus H-Bond acceptor count, H-Bond donor count, and clogD.

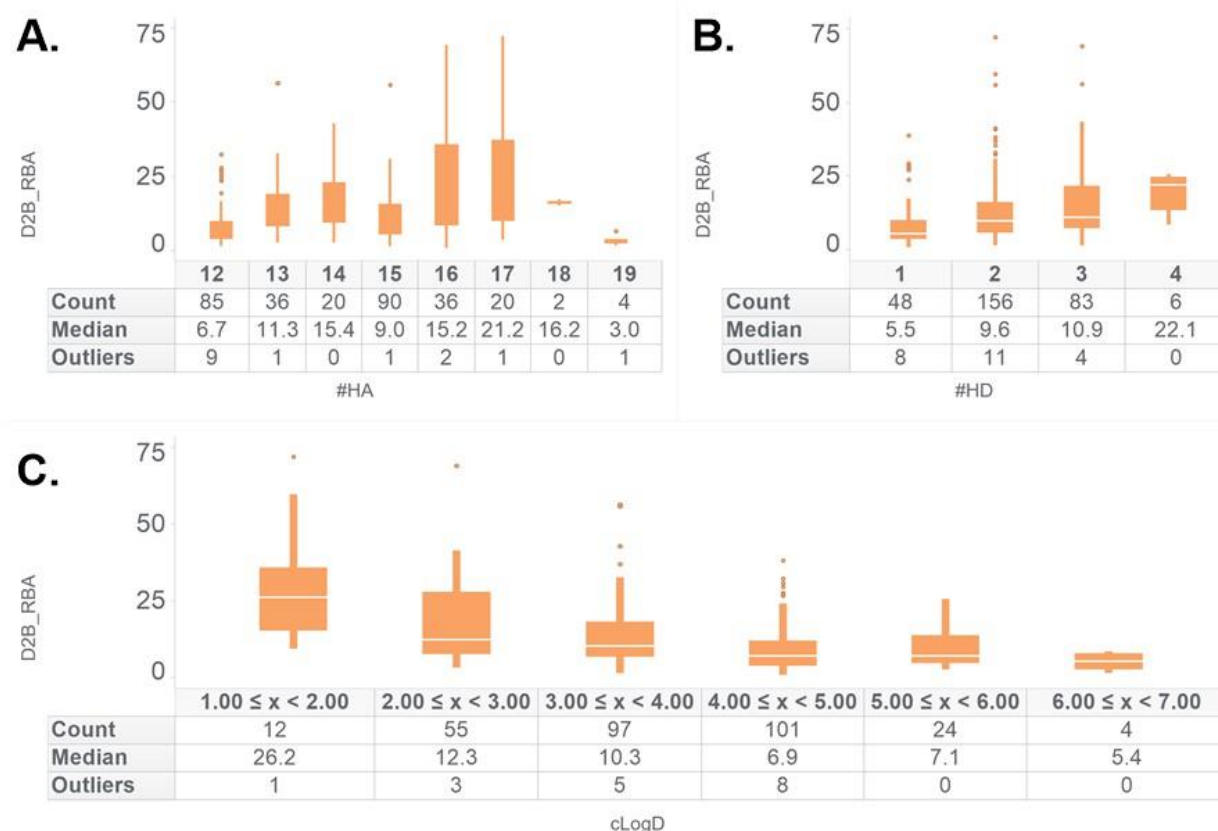

## V. Product Synthesis and Characterization

### General Procedure B: Library Synthesis of Degraders using NHS-Esters

#### Synthesis of Stock Solution of JQ1-NHS (3)

To a 20 mL vial add (S)-2-(4-(4-chlorophenyl)-2,3,9-trimethyl-6H-thieno[3,2-f][1,2,4]triazolo[4,3-a][1,4]diazepin-6-yl)acetic acid (500 mg, 1.25 mmol, 1 equiv), *N*-hydroxysuccinimide (161 mg, 1.37 mmol, 1.1 equiv), DMAP (11 mg, 0.09 mmol, 0.07 equiv), and PS-DCC resin (1.49 g, 1.67 mmol/g, 2.49 mmol, 2 equiv) followed by DMF (8.3 mL) and the resulting slurry was stirred until all solid acid was dissolved then allowed to stand at room temperature overnight after which time the resin was removed by vacuum filtration, rinsing with minimal DCM. Volatiles were removed by rotary evaporation to afford the crude product as a solution in DMF which was immediately carried forward without further purification as a stock solution in DMF ([0.21]) with presumed quantitative yield and volume of remaining DMF.

#### Synthesis of Stock Solution of O-Pom-NHS (4)

To a 40 mL vial add 2-((2-(2,6-dioxopiperidin-3-yl)-1,3-dioxoisindolin-4-yl)oxy)acetic acid (731 mg, 2.20 mmol, 1 equiv), *N*-hydroxysuccinimide (284 mg, 2.42 mmol, 1.1 equiv), DMAP (40 mg, 0.33 mmol, 0.15 equiv), and PS-DCC resin (2.65 g, 2.61 mmol/g, 6.92 mmol, 3.14 equiv) followed by DMF (14.7 mL) and the resulting slurry was stirred until all solid acid was dissolved then allowed to stand at room temperature overnight after which time the resin was removed by vacuum filtration to afford the crude product as a solution in DMF. The resulting product solution was immediately carried forward without further purification as a stock solution in DMF ([0.15]) with presumed quantitative yield.

#### Synthesis of Stock Solution of tDHU-NHS (5)

To a 20 mL vial add 3-(2,4-dioxotetrahydropyrimidin-1(2H)-yl)-4-methylbenzoic acid (350 mg, 1.41 mmol, 1 equiv), *N*-hydroxysuccinimide (182 mg, 1.55 mmol, 1.1 equiv), DMAP (12 mg, 0.1 mmol, 0.07 equiv), and PS-DCC resin (2.53 g, 1.67 mmol/g, 4.23 mmol, 3 equiv) followed by DMF (9.4 mL) and the resulting slurry was stirred until all solid acid was dissolved then allowed to stand at room temperature overnight after which time the resin was removed by vacuum filtration, rinsing with minimal DCM. The DCM was distilled off by rotary evaporation at moderate vacuum to afford the crude product as a solution in DMF which was immediately carried forward without further purification as a stock solution in DMF ([0.15]) with presumed quantitative yield.

#### Synthesis of Degraders

##### Step 1: E3-ligase ligand coupling to afford Boc-protected intermediates S

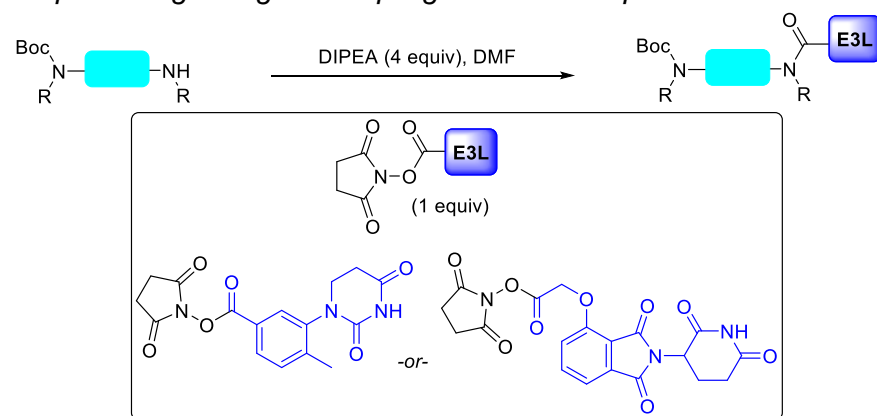



To a 24-vial reactor block containing 1 dram vials with pre-dispensed mono-Boc-diamines (80  $\mu\text{mol}$ , 1.07 equiv) was added a stock solution of either O-Pom-NHS **4** or tDHU-NHS **5** (0.52 mL, [0.15], 75  $\mu\text{mol}$ , 1 equiv) followed by DIPEA (52  $\mu\text{L}$ , 0.30 mmol, 4 equiv) before the vials were sealed, placed on either 40  $^{\circ}\text{C}$  (O-Pom-NHS) or 65  $^{\circ}\text{C}$  (tDHU-NHS) heat and stirred vigorously for 24 hours before being cooled to room temperature.

*Workup: OPom-NHS*

The reaction vials were unsealed and to each of the crude mixtures was added MP-trisamine resin (0.1 g) and an additional aliquot of DMF (0.4 mL) before the resulting slurries were stirred, gently, for 4 hours at room temperature. The contents of each vial were then transferred to a vacuum filtration plate, rinsing each source vial with DMF (0.5 mL), filtered, and the resulting filtrate transferred to fresh 1-dram vials before concentrating to dryness by centrifuge evaporation overnight to afford the crude amide intermediate.

*Workup: tDHU-NHS*

The reaction vials were unsealed and to each of the crude mixtures was added MP-isocyanate resin (0.1 g) and PS-tosyl-hydrazine resin (0.1 g) followed by an additional aliquot of DMF (0.4 mL) before the resulting slurries were stirred, gently, overnight at room temperature. The contents of each vial were then transferred to a vacuum filtration plate, rinsing each source vial with DMF (0.5 mL), filtered, and the resulting filtrate transferred to fresh 1-dram vials before concentrating to dryness by centrifuge evaporation overnight to afford the crude amide intermediate.

*Step 2: Boc-deprotection*

To a reactor block containing 1 dram vials with the crude Boc-amines, to each vial was added DCM (0.1 mL) followed by TFA (0.3 mL), the vials sealed, and the resulting mixtures stirred at room temperature for either 3 hours (O-Pom substrates) or overnight (DHU substrates) before unsealing and concentrating to dryness by centrifuge evaporation.

*Step 3: JQ1-NHS ester coupling*

To a reactor block containing 1 dram vials with crude TFA amine salts (75  $\mu\text{mol}$ , 1.07 equiv) was added a crude stock solution of JQ1-NHS ester **3** ([0.21], 0.34 mL, 70  $\mu\text{mol}$ , 1 equiv) followed by DIPEA (60  $\mu\text{L}$ , 0.35 mmol, 5 equiv) and stirred at (for O-Pom substrates) 40  $^{\circ}\text{C}$  for 16 h or (for tDHU substrates) room temperature for 72 h. The crude mixtures were treated with (O-Pom substrates) MP-trisamine (0.1 g) or (for tDHU substrates) Si-carbonate (0.1 g) and stirred gently for 5 h before transferring the contents of each vial to a vacuum filtration plate, rinsing with DMF (0.5 mL), and filtering to afford the crude reaction mixtures in DMF which were directly injected for purification using Mass-Directed Liquid Chromatography to afford purified products.

## **Product Characterization of Select Purified Validation Compounds**

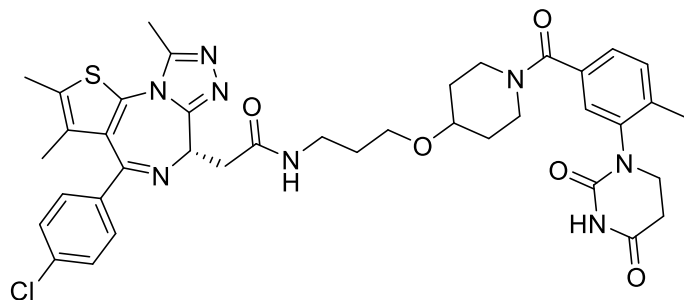

**(S)-2-(4-(4-chlorophenyl)-2,3,9-trimethyl-6H-thieno[3,2-f][1,2,4]triazolo[4,3-a][1,4]diazepin-6-yl)-N-(3-((1-(3-(2,4-dioxotetrahydropyrimidin-1(2H)-yl)-4-methylbenzoyl)piperidin-4-yl)oxy)propyl)acetamide (9).** Purified standard synthesized using General Procedure B with tDHU-NHS to give title compound (37.5 mg, 62% yield).  $^1\text{H}$  NMR (400 MHz, MeOD)  $\delta$  7.52 – 7.38 (m, 5H), 7.37 – 7.27 (m, 2H), 4.70 (dd,  $J$  = 8.5, 5.6 Hz, 1H), 3.88 (dd,  $J$  = 33.9, 15.8 Hz, 3H), 3.74 – 3.34 (m, 10H), 2.97 – 2.67 (m, 4H), 2.63 – 2.17 (m, 8H), 2.11 – 1.44 (m, 8H); HRMS-ESI ( $m/z$ ) Calcd for ( $\text{C}_{39}\text{H}_{44}\text{ClN}_8\text{O}_5\text{S}$ ) ( $[\text{M}+\text{H}]^+$ ): 771.2838; found: 771.2843.

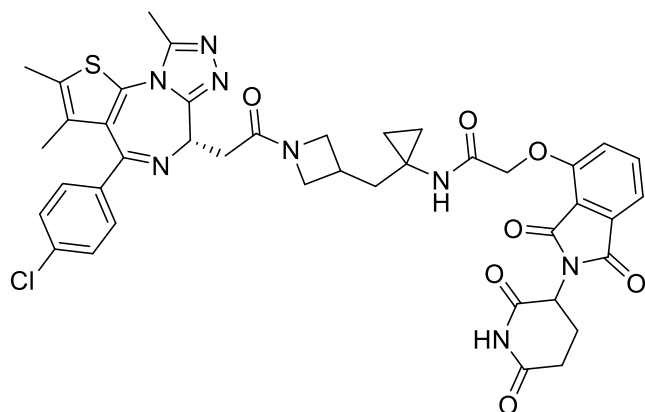

**N-(1-((1-(2-((S)-4-(4-chlorophenyl)-2,3,9-trimethyl-6H-thieno[3,2-f][1,2,4]triazolo[4,3-a][1,4]diazepin-6-yl)acetyl)azetididin-3-yl)methyl)cyclopropyl)-2-((2-(2,6-dioxopiperidin-3-yl)-1,3-dioxoisindolin-4-yl)oxy)acetamide (10).** Purified standard synthesized using General Procedure B with OPom-NHS to give title compound (22.6 mg, 37% yield).  $^1\text{H}$  NMR (400 MHz, DMSO, glutarimide N-H silent) as a mixture of diastereomers  $\delta$  11.13 (s, 1H), 8.25 (d,  $J$  = 7.5 Hz, 1H), 7.88 – 7.78 (m, 1H), 7.61 – 7.28 (m, 6H), 5.26 – 5.05 (m, 1H), 4.74 (s, 2H), 4.58 – 4.33 (m, 2H), 4.25 – 3.87 (m, 2H), 3.28 – 3.04 (m, 2H), 3.00 – 2.71 (m, 2H), 2.61 (d,  $J$  = 2.3 Hz, 4H), 2.42 (s, 3H), 2.11 – 1.79 (m, 3H), 1.63 (d,  $J$  = 2.6 Hz, 3H), 0.66 (d,  $J$  = 4.0 Hz, 4H).  $^{13}\text{C}$  NMR (100 MHz, DMSO) as a mixture of diastereomers  $\delta$  172.8, 169.9, 169.6, 167.5, 167.5, 166.8, 165.6, 165.5, 163.3, 163.2, 155.2, 155.0, 150.1, 137.0, 136.7, 135.3, 133.0, 132.2, 130.9, 130.2, 129.9, 129.6, 129.6, 128.5, 120.5, 116.8, 116.8, 116.0, 67.6, 55.3, 53.8, 53.7, 53.0, 48.8, 33.1, 31.2, 31.1, 30.9, 26.6, 22.0, 14.1, 12.7, 12.6, 11.3. HRMS-ESI ( $m/z$ ) Calcd for ( $\text{C}_{41}\text{H}_{40}\text{ClN}_8\text{O}_7\text{S}$ ) ( $[\text{M}+\text{H}]^+$ ): 823.2429; found: 823.2425.

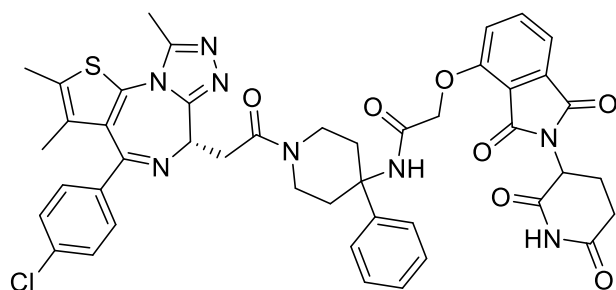

***N*-(1-(2-((*S*)-4-(4-chlorophenyl)-2,3,9-trimethyl-6*H*-thieno[3,2-*f*][1,2,4]triazolo[4,3-*a*][1,4]diazepin-6-yl)acetyl)-4-phenylpiperidin-4-yl)-2-((2-(2,6-dioxopiperidin-3-yl)-1,3-dioxoisindolin-4-yl)oxy)acetamide (11).** Purified standard synthesized using General Procedure B with OPom-NHS to give title compound (3.0 mg, 4% yield). <sup>1</sup>H NMR (401 MHz, DMSO, 6H not observed due to suppression of water signal) δ 11.05 (dd, *J* = 12.4, 6.2 Hz, 1H), 7.96 (s, 1H), 7.77 – 7.63 (m, 1H), 7.50 – 6.91 (m, 10H), 5.01 (s, 1H), 4.76 (d, *J* = 21.0 Hz, 1H), 4.68 – 4.50 (m, 3H), 4.32 – 3.96 (m, 1H), 3.53 (t, *J* = 66.4 Hz, 3H), 2.91 – 2.65 (m, 1H), 2.65 – 2.53 (m, 3H), 2.38 (d, *J* = 4.3 Hz, 3H), 1.98 (s, 1H), 1.58 (q, *J* = 5.5, 5.0 Hz, 3H). HRMS-ESI (*m/z*) Calcd for (C<sub>45</sub>H<sub>42</sub>ClN<sub>8</sub>O<sub>7</sub>S) ([*M*+*H*]<sup>+</sup>): 873.2580; found: 873.2586.

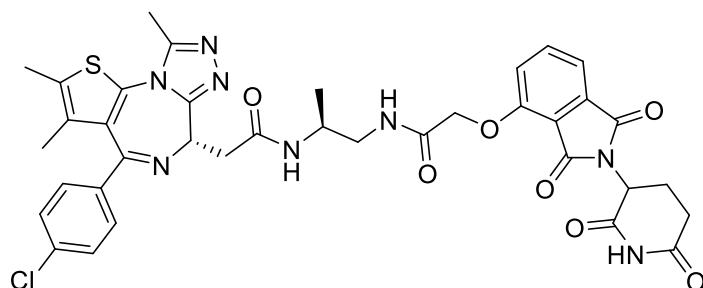

**2-((*S*)-4-(4-chlorophenyl)-2,3,9-trimethyl-6*H*-thieno[3,2-*f*][1,2,4]triazolo[4,3-*a*][1,4]diazepin-6-yl)-*N*-((2*S*)-1-(2-((2-(2,6-dioxopiperidin-3-yl)-1,3-dioxoisindolin-4-yl)oxy)acetamido)propan-2-yl)acetamide (S1).** Purified standard synthesized using General Procedure B with OPom-NHS to give title compound (6.1 mg, 10% yield). <sup>1</sup>H NMR (401 MHz, DMSO, 2H masked by DMSO peak) as a mixture of diastereomers δ 11.07 (s, 1H), 8.73 (s, 1H), 7.79 (q, *J* = 8.1, 6.7 Hz, 1H), 7.60 – 7.11 (m, 7H), 5.03 (q, *J* = 5.4 Hz, 1H), 4.73 (d, *J* = 4.3 Hz, 2H), 4.51 (s, 1H), 3.50 (d, *J* = 35.6 Hz, 3H), 3.33 (s, 1H), 2.86 (d, *J* = 57.0 Hz, 2H), 2.55 (t, *J* = 3.0 Hz, 3H), 2.34 (d, *J* = 4.3 Hz, 3H), 2.12 (d, *J* = 51.8 Hz, 2H), 1.80 – 1.31 (m, 5H). HRMS-ESI (*m/z*) Calcd for (C<sub>37</sub>H<sub>36</sub>ClN<sub>8</sub>O<sub>7</sub>S) ([*M*+*H*]<sup>+</sup>): 771.2111; found: 771.2123.

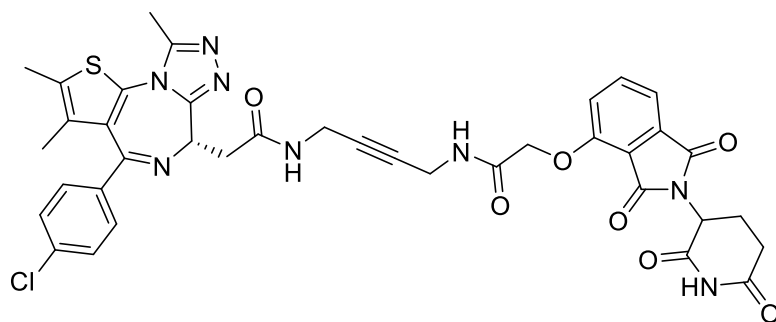

**2-((*S*)-4-(4-chlorophenyl)-2,3,9-trimethyl-6*H*-thieno[3,2-*f*][1,2,4]triazolo[4,3-*a*][1,4]diazepin-6-yl)-*N*-(4-(2-((2-(2,6-dioxopiperidin-3-yl)-1,3-dioxoisindolin-4-yl)oxy)acetamido)but-2-yn-**

**1-yl)acetamide (S2).** Purified standard synthesized using General Procedure B with OPom-NHS to give title compound (2 mg, 3% yield). <sup>1</sup>H NMR (400 MHz, DMSO) δ 11.13 (s, 1H), 8.68 (t, J = 5.5 Hz, 1H), 8.46 (t, J = 5.6 Hz, 1H), 7.81 (dd, J = 8.5, 7.3 Hz, 1H), 7.53 – 7.46 (m, 3H), 7.41 (dt, J = 13.6, 8.0 Hz, 3H), 5.12 (dd, J = 12.9, 5.4 Hz, 1H), 4.84 (s, 2H), 4.51 (dd, J = 8.0, 6.2 Hz, 1H), 4.03 – 3.92 (m, 3H), 3.33 – 3.13 (m, 2H), 2.96 – 2.82 (m, 1H), 2.59 (s, 4H), 2.41 (s, 3H), 2.07 – 1.98 (m, 1H), 1.61 (s, 3H). <sup>13</sup>C NMR (100 MHz, DMSO) δ 172.8, 169.9, 169.3, 166.8, 166.8, 165.4, 163.2, 155.1, 155.0, 150.0, 136.9, 136.7, 135.3, 133.1, 132.2, 130.9, 130.2, 129.9, 129.6, 128.5, 120.4, 116.8, 116.1, 79.3, 78.5, 67.4, 53.7, 48.8, 37.3, 31.0, 28.0, 28.0, 22.0, 14.1, 12.7, 11.3. HRMS-ESI (m/z) Calcd for (C<sub>38</sub>H<sub>34</sub>ClN<sub>8</sub>O<sub>7</sub>S) ([M+H]<sup>+</sup>): 781.1960; found: 781.1958.

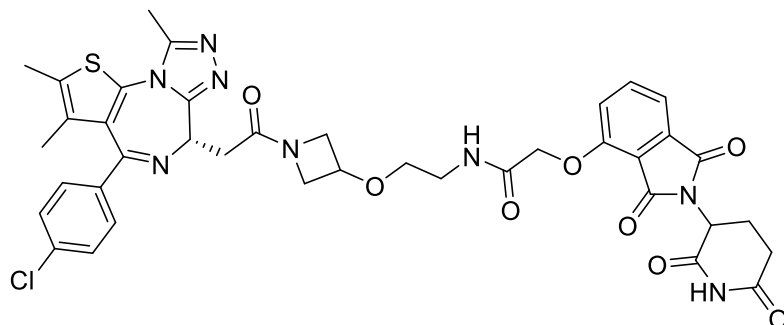

**N-(2-((1-(2-((S)-4-(4-chlorophenyl)-2,3,9-trimethyl-6H-thieno[3,2-f][1,2,4]triazolo[4,3-a][1,4]diazepin-6-yl)acetyl)azetidin-3-yl)oxy)ethyl)-2-((2-(2,6-dioxopiperidin-3-yl)-1,3-dioxoisindolin-4-yl)oxy)acetamide (S3).** Purified standard synthesized using General Procedure B with OPom-NHS to give title compound (6 mg, 10% yield). <sup>1</sup>H NMR (401 MHz, DMSO) as a mixture of diastereomers δ 11.10 (s, 1H), 7.76 (dt, J = 11.0, 8.0 Hz, 1H), 7.52 – 7.22 (m, 8H), 5.14 (d, J = 8.7 Hz, 2H), 5.05 (dd, J = 12.8, 5.4 Hz, 1H), 4.53 (t, J = 6.8 Hz, 1H), 3.87 – 3.80 (m, 1H), 3.77 – 3.34 (m, 2H), 3.01 (s, 3H), 2.57 (s, 4H), 2.37 (s, 3H), 2.15 – 1.93 (m, 1H), 1.59 (s, 3H). HRMS-ESI (m/z) Calcd for (C<sub>39</sub>H<sub>38</sub>ClN<sub>8</sub>O<sub>8</sub>S) ([M+H]<sup>+</sup>): 813.2222; found: 813.2232.

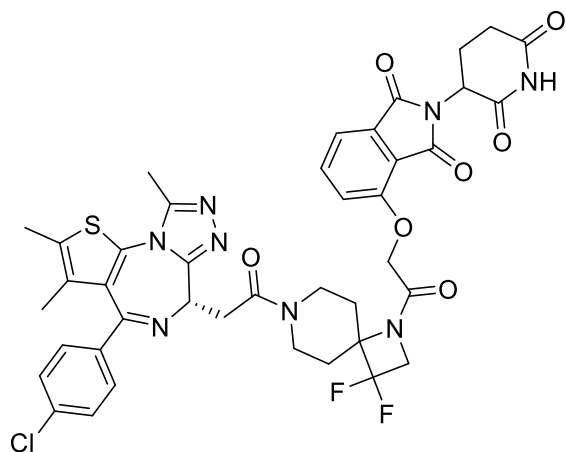

**4-(2-(7-(2-((S)-4-(4-chlorophenyl)-2,3,9-trimethyl-6H-thieno[3,2-f][1,2,4]triazolo[4,3-a][1,4]diazepin-6-yl)acetyl)-3,3-difluoro-1,7-diazaspiro[3.5]nonan-1-yl)-2-oxoethoxy)-2-(2,6-dioxopiperidin-3-yl)isoindoline-1,3-dione (S4).** Purified standard synthesized using General Procedure B with OPom-NHS to give title compound (16 mg, 27% yield, 90% purity). <sup>1</sup>H NMR (400 MHz, MeOD, 6H masked by DMSO and water peaks) as a mixture of diastereomers δ 7.74 (s, 1H), 6.97 (dd, J = 8.5, 7.3 Hz, 1H), 6.76 – 6.51 (m, 6H), 4.32 (dd, J = 12.6, 5.4 Hz, 1H),

4.14 – 4.07 (m, 2H), 3.89 (td,  $J = 5.9, 2.6$  Hz, 1H), 3.79 (d,  $J = 14.9$  Hz, 1H), 3.57 (t,  $J = 13.4$  Hz, 1H), 2.99 – 2.85 (m, 1H), 2.78 – 2.53 (m, 2H), 2.23 – 1.76 (m, 6H), 1.71 – 1.59 (m, 3H), 1.58 – 1.24 (m, 2H), 0.91 – 0.87 (m, 3H); HRMS-ESI ( $m/z$ ) Calcd for ( $C_{41}H_{38}ClF_2N_8O_7S$ ) ( $[M+H]^+$ ): 859.2241; found: 859.2237.

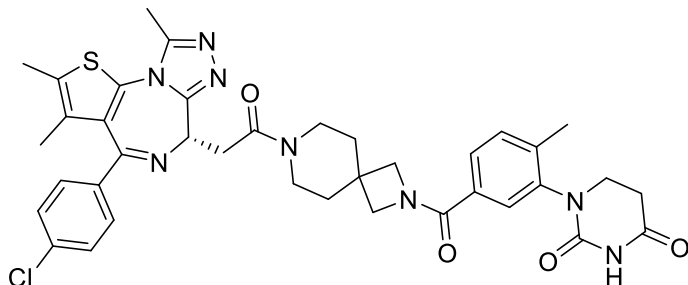

**(S)-1-(5-(7-(2-(4-(4-chlorophenyl)-2,3,9-trimethyl-6H-thieno[3,2-f][1,2,4]triazolo[4,3-a][1,4]diazepin-6-yl)acetyl)-2,7-diazaspiro[3.5]nonane-2-carbonyl)-2-methylphenyl)dihydropyrimidine-2,4(1H,3H)-dione (S5).** Purified standard synthesized using General Procedure B with tDHU-NHS to give title compound (42 mg, 81% yield).  $^1H$  NMR (400 MHz, MeOD)  $\delta$  7.63 – 7.57 (m, 2H), 7.51 – 7.39 (m, 6H), 4.75 (t,  $J = 6.9$  Hz, 1H), 4.21 (d,  $J = 4.3$  Hz, 2H), 4.01 – 3.84 (m, 3H), 3.82 – 3.48 (m, 6H), 2.96 – 2.78 (m, 2H), 2.77 – 2.72 (m, 3H), 2.46 (s, 3H), 2.33 (s, 3H), 2.06 – 1.92 (m, 2H), 1.83 (t,  $J = 5.8$  Hz, 2H), 1.71 (s, 3H). HRMS-ESI ( $m/z$ ) Calcd for ( $C_{38}H_{40}ClN_8O_4S$ ) ( $[M+H]^+$ ): 739.2576; found: 739.2584.

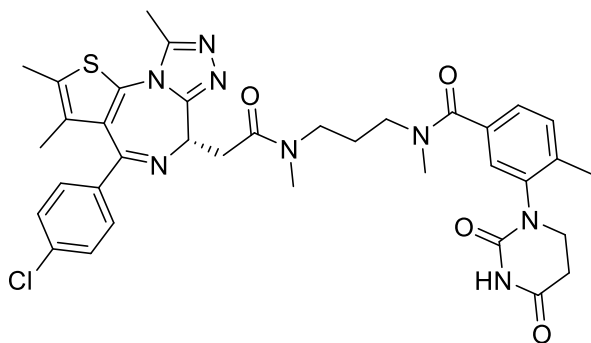

**(S)-N-(3-(2-(4-(4-chlorophenyl)-2,3,9-trimethyl-6H-thieno[3,2-f][1,2,4]triazolo[4,3-a][1,4]diazepin-6-yl)-N-methylacetamido)propyl)-3-(2,4-dioxotetrahydropyrimidin-1(2H)-yl)-N,4-dimethylbenzamide (S6).** Purified standard synthesized using General Procedure B with tDHU-NHS to give title compound (37 mg, 73% yield).  $^1H$  NMR (400 MHz, MeOD)  $\delta$  10.36 (s, 1H), 7.63 – 7.08 (m, 7H), 4.54 (d,  $J = 40.7$  Hz, 2H), 3.79 (s, 1H), 3.45 (d,  $J = 39.0$  Hz, 6H), 3.20 (s, 1H), 2.96 (d,  $J = 26.6$  Hz, 5H), 2.61 (s, 4H), 2.43 (s, 4H), 2.20 (s, 4H), 2.01 (d,  $J = 12.1$  Hz, 1H), 1.86 – 1.56 (m, 4H). HRMS-ESI ( $m/z$ ) Calcd for ( $C_{36}H_{40}ClN_8O_4S$ ) ( $[M+H]^+$ ): 715.2582; found: 715.2581.

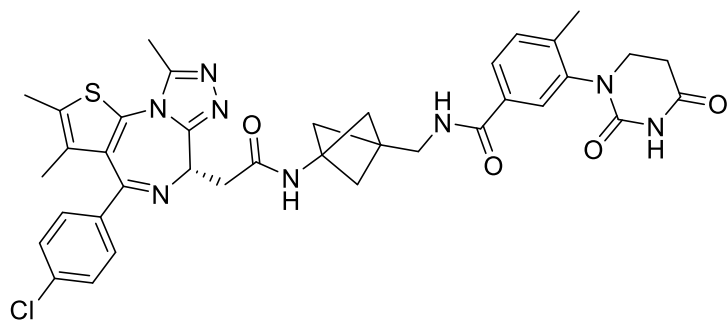

**(S)-N-((3-(2-(4-(4-chlorophenyl)-2,3,9-trimethyl-6H-thieno[3,2-f][1,2,4]triazolo[4,3-a][1,4]diazepin-6-yl)acetamido)bicyclo[1.1.1]pentan-1-yl)methyl)-3-(2,4-dioxotetrahydropyrimidin-1(2H)-yl)-4-methylbenzamide (S7).** Purified standard synthesized using General Procedure B with tDHU-NHS to give title compound (33 mg, 66% yield) as a TFA salt. <sup>1</sup>H NMR (400 MHz, DMSO) δ 10.39 (s, 1H), 8.67 (s, 1H), 8.46 (t, *J* = 6.0 Hz, 1H), 7.73 (d, *J* = 8.4 Hz, 2H), 7.56 – 7.30 (m, 5H), 4.47 (t, *J* = 7.0 Hz, 1H), 3.82 (ddd, *J* = 14.6, 9.3, 5.2 Hz, 1H), 3.55 (dt, *J* = 12.2, 6.0 Hz, 1H), 3.43 (q, *J* = 8.3, 7.0 Hz, 2H), 3.25 – 3.11 (m, 2H), 2.86 – 2.65 (m, 2H), 2.60 (s, 3H), 2.41 (s, 3H), 2.23 (s, 3H), 1.90 (s, 6H), 1.62 (s, 3H). <sup>13</sup>C NMR (101 MHz, DMSO) δ 170.7, 169.8, 165.3, 163.1, 158.4, 158.0, 155.0, 151.8, 149.9, 140.8, 138.9, 136.7, 135.3, 133.4, 132.2, 130.8, 130.4, 130.2, 129.9, 129.6, 128.5, 126.2, 126.1, 116.9, 114.0, 53.6, 52.1, 45.5, 44.5, 37.5, 36.7, 31.1, 17.5, 14.1, 12.7, 11.3. HRMS-ESI (*m/z*) Calcd for (C<sub>37</sub>H<sub>38</sub>ClN<sub>8</sub>O<sub>4</sub>S) ([M+H]<sup>+</sup>): 725.2425; found: 725.2421.

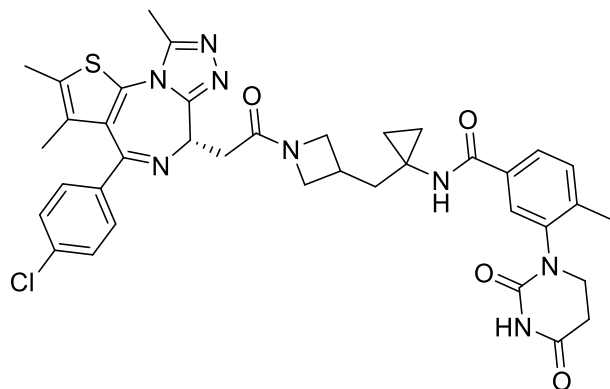

**(S)-N-((1-((1-(2-(4-(4-chlorophenyl)-2,3,9-trimethyl-6H-thieno[3,2-f][1,2,4]triazolo[4,3-a][1,4]diazepin-6-yl)acetyl)azetid-3-yl)methyl)cyclopropyl)-3-(2,4-dioxotetrahydropyrimidin-1(2H)-yl)-4-methylbenzamide (S8).** Purified standard synthesized using General Procedure B with tDHU-NHS to give title compound (39 mg, 69% yield, 90% purity). <sup>1</sup>H NMR (400 MHz, MeOD, N-H protons silent, 2H masked by MeOD signal) δ 7.83 – 7.61 (m, 2H), 7.57 – 7.34 (m, 5H), 4.69 – 4.50 (m, 2H), 4.34 – 4.07 (m, 2H), 3.93 – 3.56 (m, 2H), 3.35 (s, 0H), 3.30 – 3.10 (m, 1H), 2.99 (t, *J* = 7.0 Hz, 1H), 2.90 – 2.67 (m, 5H), 2.45 (s, 3H), 2.35 – 2.25 (m, 3H), 2.06 (dd, *J* = 11.8, 7.4 Hz, 2H), 1.69 (d, *J* = 2.1 Hz, 3H), 1.13 – 0.66 (m, 4H); HRMS-ESI (*m/z*) Calcd for (C<sub>38</sub>H<sub>40</sub>ClN<sub>8</sub>O<sub>4</sub>S) ([M+H]<sup>+</sup>): 739.2576; found: 739.2578.

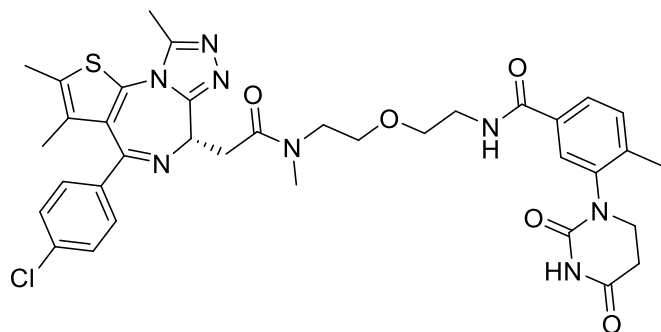

**(S)-N-(2-(2-(2-(4-(4-chlorophenyl)-2,3,9-trimethyl-6H-thieno[3,2-f][1,2,4]triazolo[4,3-a][1,4]diazepin-6-yl)-N-methylacetamido)ethoxy)ethyl)-3-(2,4-dioxotetrahydropyrimidin-1(2H)-yl)-4-methylbenzamide (S9).** Purified standard synthesized using General Procedure B with tDHU-NHS to give title compound (19 mg, 38% yield).  $^1\text{H}$  NMR (400 MHz, DMSO, 2H masked by NMR solvent) as a mixture of diastereomers  $\delta$  10.41 – 10.31 (m, 1H), 8.59 – 8.39 (m, 1H), 7.77 – 7.61 (m, 2H), 7.52 – 7.39 (m, 4H), 7.30 (ddd,  $J$  = 30.4, 8.1, 3.2 Hz, 1H), 4.56 (dt,  $J$  = 12.8, 6.3 Hz, 1H), 3.84 – 3.36 (m, 11H), 3.17 (s, 1H), 2.94 – 2.54 (m, 6H), 2.44 – 2.39 (m, 3H), 2.28 – 2.09 (m, 3H), 1.69 – 1.60 (m, 3H). HRMS-ESI ( $m/z$ ) Calcd for ( $\text{C}_{36}\text{H}_{40}\text{ClN}_8\text{O}_5\text{S}$ ) ( $[\text{M}+\text{H}]^+$ ): 731.2525; found: 731.2528.

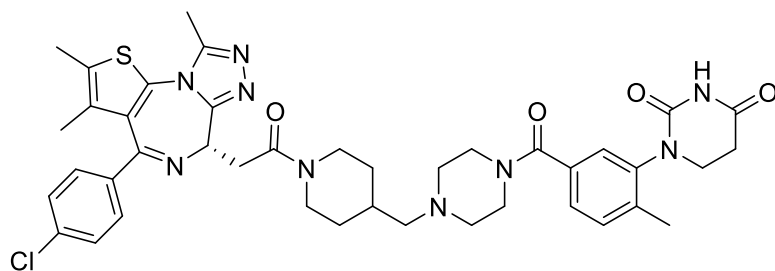

**(S)-1-(5-(4-((1-(2-(4-(4-chlorophenyl)-2,3,9-trimethyl-6H-thieno[3,2-f][1,2,4]triazolo[4,3-a][1,4]diazepin-6-yl)acetyl)piperidin-4-yl)methyl)piperazine-1-carbonyl)-2-methylphenyl) dihydropyrimidine-2,4(1H,3H)-dione (S10).** Purified standard synthesized using HATU (1.05 equiv) and DIPEA (5 equiv) from JQ1-CO<sub>2</sub>H (60  $\mu\text{mol}$ , 1 equiv) to give title compound (8.5 mg, 17% yield).  $^1\text{H}$  NMR (400 MHz, MeOD, N-H proton is silent, 9H missing due to broadening)  $\delta$  7.59 – 7.33 (m, 7H), 4.71 (t,  $J$  = 6.9 Hz, 1H), 4.60 (d,  $J$  = 13.3 Hz, 1H), 4.31 (t,  $J$  = 16.2 Hz, 1H), 3.87 (ddd,  $J$  = 12.4, 9.6, 5.4 Hz, 1H), 3.76 – 3.44 (m, 3H), 3.18 (d,  $J$  = 6.9 Hz, 2H), 2.95 – 2.66 (m, 6H), 2.46 (d,  $J$  = 0.8 Hz, 3H), 2.35 (s, 3H), 2.26 (dd,  $J$  = 16.6, 9.3 Hz, 1H), 2.04 – 1.82 (m, 2H), 1.70 (d,  $J$  = 0.9 Hz, 3H), 1.64 – 1.36 (m, 1H), 1.36 – 1.16 (m, 1H).; HRMS-ESI ( $m/z$ ) Calcd for ( $\text{C}_{41}\text{H}_{46}\text{ClN}_9\text{O}_4\text{S}$ ) ( $[\text{M}+\text{H}]^+$ ): 796.3155; found: 796.3154.

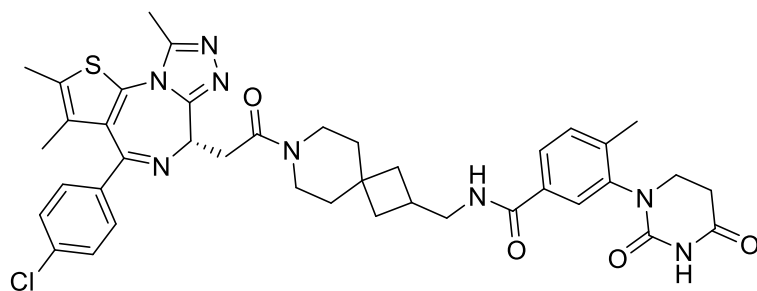

**(S)-N-((7-(2-(4-(4-chlorophenyl)-2,3,9-trimethyl-6H-thieno[3,2-f][1,2,4]triazolo[4,3-a][1,4]diazepin-6-yl)acetyl)-7-azaspiro[3.5]nonan-2-yl)methyl)-3-(2,4-dioxotetrahydropyrimidin-1(2H)-yl)-4-methylbenzamide (S11).** Purified standard synthesized using HATU (1.05 equiv) and DIPEA (5 equiv) from JQ1-CO<sub>2</sub>H (60 μmol, 1 equiv) to give the title compound (25.1 mg, 52%). <sup>1</sup>H NMR (400 MHz, MeOD, N-H protons silent) δ 7.82 – 7.65 (m, 2H), 7.59 – 7.30 (m, 5H), 4.75 (dd, *J* = 7.4, 6.3 Hz, 1H), 3.89 (ddd, *J* = 12.6, 9.4, 5.6 Hz, 1H), 3.76 – 3.48 (m, 7H), 3.44 (d, *J* = 7.2 Hz, 2H), 2.96 – 2.76 (m, 2H), 2.74 (s, 3H), 2.64 (p, *J* = 7.8 Hz, 1H), 2.46 (d, *J* = 0.9 Hz, 3H), 2.33 (s, 3H), 2.10 – 1.99 (m, 2H), 1.83 – 1.76 (m, 1H), 1.73 – 1.60 (m, 7H), 1.56 (t, *J* = 5.8 Hz, 1H); HRMS-ESI (*m/z*) Calcd for (C<sub>40</sub>H<sub>44</sub>ClN<sub>8</sub>O<sub>4</sub>S) ([M+H]<sup>+</sup>): 767.2889; found: 767.2891.

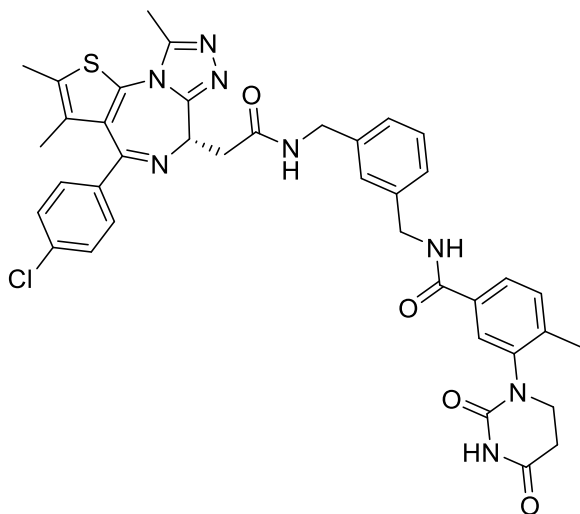

**(S)-N-3-(((2-(4-(4-chlorophenyl)-2,3,9-trimethyl-6H-thieno[3,2-f][1,2,4]triazolo[4,3-a][1,4]diazepin-6-yl)acetamido)methyl)benzyl)-3-(2,4-dioxotetrahydropyrimidin-1(2H)-yl)-4-methylbenzamide (S12).** Purified standard synthesized using General Procedure B with tDHU-NHS to give title compound (29 mg, 55% yield). <sup>1</sup>H NMR (400 MHz, MeOD, N-H protons silent, 1H masked by residual NMR solvent peak) δ 7.80 – 7.70 (m, 2H), 7.37 (d, *J* = 7.0 Hz, 6H), 7.34 – 7.22 (m, 3H), 4.71 – 4.31 (m, 5H), 3.84 (ddt, *J* = 13.8, 9.6, 4.9 Hz, 1H), 3.64 (dtd, *J* = 12.4, 6.1, 2.8 Hz, 1H), 3.46 (dd, *J* = 14.9, 8.8 Hz, 1H), 3.36 (d, *J* = 5.7 Hz, 1H), 2.91 – 2.64 (m, 5H), 2.44 (s, 3H), 2.30 (s, 3H), 1.68 (s, 3H); HRMS-ESI (*m/z*) Calcd for (C<sub>39</sub>H<sub>38</sub>ClN<sub>8</sub>O<sub>4</sub>S) ([M+H]<sup>+</sup>): 749.2425; found: 749.2428.

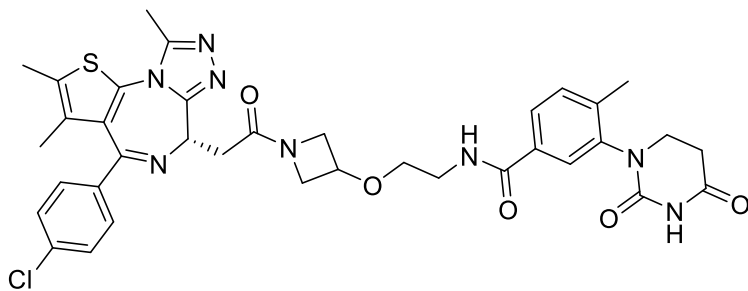

**(S)-N-2-(((1-(2-(4-(4-chlorophenyl)-2,3,9-trimethyl-6H-thieno[3,2-f][1,2,4]triazolo[4,3-a][1,4]diazepin-6-yl)acetyl)azetidinoxy)ethyl)-3-(2,4-dioxotetrahydropyrimidin-1(2H)-yl)-4-methylbenzamide (S13).** Purified standard synthesized using General Procedure B with



tDHU-NHS to give title compound (38 mg, 75% yield). <sup>1</sup>H NMR (400 MHz, MeOD, N-H protons are silent) δ 7.75 (d, *J* = 6.4 Hz, 2H), 7.60 – 7.31 (m, 5H), 4.72 – 4.56 (m, 2H), 4.48 (dq, *J* = 6.8, 3.4 Hz, 1H), 4.37 – 4.16 (m, 2H), 3.89 (dddd, *J* = 16.7, 12.7, 9.3, 3.6 Hz, 2H), 3.64 (ddd, *J* = 16.3, 7.2, 4.8 Hz, 4H), 3.46 – 3.33 (m, 2H), 3.29 – 3.20 (m, 1H), 2.96 – 2.68 (m, 5H), 2.46 (s, 3H), 2.31 (d, *J* = 1.9 Hz, 3H), 1.69 (s, 3H); HRMS-ESI (*m/z*) Calcd for (C<sub>36</sub>H<sub>38</sub>ClN<sub>8</sub>O<sub>5</sub>S) ([M+H]<sup>+</sup>): 729.2369; found: 729.2375.

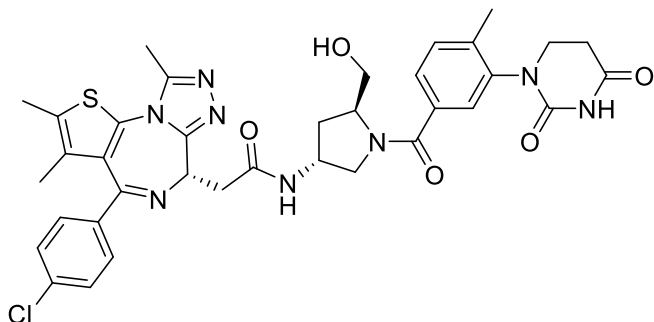

**2-((S)-4-(4-chlorophenyl)-2,3,9-trimethyl-6H-thieno[3,2-f][1,2,4]triazolo[4,3-a][1,4]diazepin-6-yl)-N-((3R,5S)-1-(3-(2,4-dioxotetrahydropyrimidin-1(2H)-yl)-4-methylbenzoyl)-5-(hydroxymethyl)pyrrolidin-3-yl)acetamide (S14).** Purified standard synthesized using General Procedure B with tDHU-NHS to give title compound (36 mg, 58% yield). <sup>1</sup>H NMR (400 MHz, MeOD, N-H and O-H protons silent, 1H masked by residual NMR solvent signal) δ 7.59 – 7.25 (m, 7H), 4.70 – 4.31 (m, 4H), 4.06 – 3.54 (m, 3H), 3.49 (t, *J* = 10.2 Hz, 1H), 2.97 – 2.61 (m, 5H), 2.44 (s, 4H), 2.32 (s, 5H), 2.15 (d, *J* = 10.1 Hz, 1H), 1.67 (t, *J* = 8.2 Hz, 4H); HRMS-ESI (*m/z*) Calcd for (C<sub>36</sub>H<sub>38</sub>ClN<sub>8</sub>O<sub>5</sub>S) ([M+H]<sup>+</sup>): 729.2374; found: 729.2370.

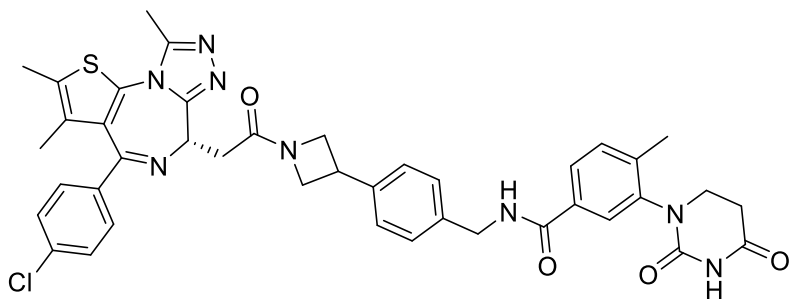

**(S)-N-(4-(1-(2-(4-(4-chlorophenyl)-2,3,9-trimethyl-6H-thieno[3,2-f][1,2,4]triazolo[4,3-a][1,4]diazepin-6-yl)acetyl)azetid-3-yl)benzyl)-3-(2,4-dioxotetrahydropyrimidin-1(2H)-yl)-4-methylbenzamide (S15).** Purified standard synthesized using General Procedure B with tDHU-NHS to give title compound (36 mg, 66% yield). <sup>1</sup>H NMR (400 MHz, MeOD, N-H protons silent, 1H masked by residual NMR solvent signal) δ 7.78 (dd, *J* = 6.8, 1.8 Hz, 2H), 7.65 – 7.29 (m, 9H), 4.78 – 4.64 (m, 1H), 4.64 – 4.39 (m, 4H), 4.22 – 3.81 (m, 3H), 3.67 (ddd, *J* = 13.0, 6.6, 5.2 Hz, 1H), 3.56 – 3.36 (m, 2H), 3.28 – 3.20 (m, 0H), 2.95 – 2.70 (m, 5H), 2.46 (s, 3H), 2.33 (s, 3H), 1.70 (d, *J* = 5.9 Hz, 3H); HRMS-ESI (*m/z*) Calcd for (C<sub>41</sub>H<sub>40</sub>ClN<sub>8</sub>O<sub>4</sub>S) ([M+H]<sup>+</sup>): 775.2576; found: 775.2583.

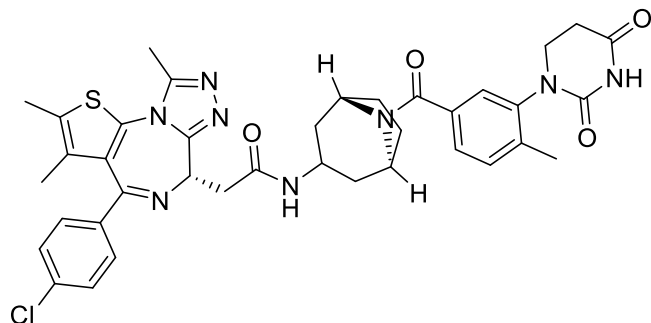

**2-((S)-4-(4-chlorophenyl)-2,3,9-trimethyl-6H-thieno[3,2-f][1,2,4]triazolo[4,3-a][1,4]diazepin-6-yl)-N-((1S,5S)-8-(3-(2,4-dioxotetrahydropyrimidin-1(2H)-yl)-4-methylbenzoyl)-8-azabicyclo[3.2.1]octan-3-yl)acetamide (S16).** <sup>1</sup>H NMR (400 MHz, MeOD) *N*-H protons not observed, 2H missing  $\delta$  7.46 (d,  $J$  = 6.9 Hz, 7H), 4.79 (d,  $J$  = 13.8 Hz, 1H), 4.68 (dd,  $J$  = 8.9, 5.4 Hz, 1H), 4.44 (tt,  $J$  = 11.6, 5.8 Hz, 1H), 4.25 (s, 1H), 3.90 (s, 1H), 3.71 (s, 1H), 3.41 (dd,  $J$  = 15.0, 9.0 Hz, 1H), 3.31 – 3.24 (m, 1H), 3.04 – 2.68 (m, 5H), 2.48 (s, 3H), 2.36 (s, 3H), 2.27 – 1.80 (m, 6H), 1.73 (s, 3H). HRMS-ESI ( $m/z$ ) Calcd for (C<sub>38</sub>H<sub>40</sub>ClN<sub>8</sub>O<sub>4</sub>S) ([M+H]<sup>+</sup>): 739.2582; found: 739.2577.

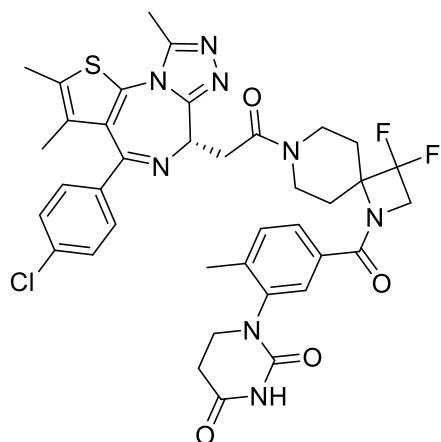

**(S)-1-(5-(7-(2-(4-(4-chlorophenyl)-2,3,9-trimethyl-6H-thieno[3,2-f][1,2,4]triazolo[4,3-a][1,4]diazepin-6-yl)acetyl)-3,3-difluoro-1,7-diazaspiro[3.5]nonane-1-carbonyl)-2-methylphenyl)dihydropyrimidine-2,4(1H,3H)-dione (S17).** Purified standard synthesized using General Procedure B with tDHU-NHS to give title compound (14 mg, 26% yield). <sup>1</sup>H NMR (400 MHz, DMSO)  $\delta$  10.40 (s, 1H), 7.80 – 7.17 (m, 7H), 4.95 – 4.57 (m, 1H), 4.55 – 4.28 (m, 1H), 3.82 (d,  $J$  = 12.2 Hz, 1H), 3.58 (ddd,  $J$  = 22.8, 14.8, 6.8 Hz, 3H), 3.23 (q,  $J$  = 12.6 Hz, 1H), 2.74 (s, 2H), 2.61 (s, 3H), 2.47 – 2.06 (m, 8H), 1.65 (s, 3H). HRMS-ESI ( $m/z$ ) Calcd for (C<sub>38</sub>H<sub>38</sub>ClF<sub>2</sub>N<sub>8</sub>O<sub>4</sub>S) ([M+H]<sup>+</sup>): 775.2393; found: 775.2390.

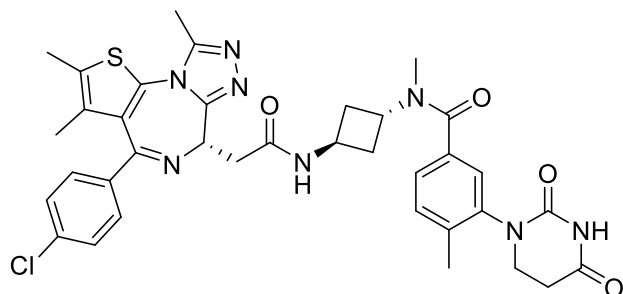

***N*-(1*S*,3*r*)-3-(2-((*S*)-4-(4-chlorophenyl)-2,3,9-trimethyl-6*H*-thieno[3,2-*f*][1,2,4]triazolo[4,3-*a*][1,4]diazepin-6-yl)acetamido)cyclobutyl)-3-(2,4-dioxotetrahydropyrimidin-1(2*H*)-yl)-*N*,4-dimethylbenzamide (S18).** Purified standard synthesized using General Procedure B with tDHU-NHS to give title compound (12 mg, 23% yield). <sup>1</sup>H NMR (400 MHz, MeOD, *N*-H signals not observed, 2H missing due to broadening) δ 7.38 (d, *J* = 28.6 Hz, 7H), 4.60 (dd, *J* = 13.6, 6.5 Hz, 1H), 4.25 (s, 1H), 3.87 (td, *J* = 12.1, 9.5, 5.6 Hz, 1H), 3.68 (dq, *J* = 12.0, 5.9 Hz, 1H), 3.43 (d, *J* = 42.1 Hz, 2H), 3.10 (s, 3H), 2.99 – 2.62 (m, 7H), 2.44 (s, 3H), 2.34 (s, 3H), 1.69 (s, 3H); HRMS-ESI (m/z) Calcd for (C<sub>36</sub>H<sub>38</sub>ClN<sub>8</sub>O<sub>4</sub>S) ([M+H]<sup>+</sup>): 713.2425; found: 713.2424.

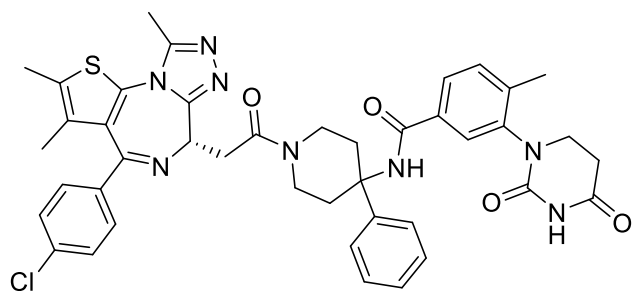

**(*S*)-*N*-(1-(2-(4-(4-chlorophenyl)-2,3,9-trimethyl-6*H*-thieno[3,2-*f*][1,2,4]triazolo[4,3-*a*][1,4]diazepin-6-yl)acetyl)-4-phenylpiperidin-4-yl)-3-(2,4-dioxotetrahydropyrimidin-1(2*H*)-yl)-4-methylbenzamide (S19).** Purified standard synthesized using HATU (1.05 equiv) and DIPEA (5 equiv) from JQ1-CO<sub>2</sub>H (32 μmol, 1 equiv) to give the title compound (18.7 mg, 74%). <sup>1</sup>H NMR (400 MHz, MeOD) δ 7.93 – 7.64 (m, 2H), 7.64 – 7.30 (m, 10H), 7.24 (q, *J* = 7.6 Hz, 1H), 4.72 (dd, *J* = 7.8, 6.0 Hz, 1H), 4.49 (d, *J* = 13.8 Hz, 1H), 4.23 (d, *J* = 14.2 Hz, 1H), 3.89 (d, *J* = 11.7 Hz, 1H), 3.81 – 3.48 (m, 4H), 3.19 (q, *J* = 15.7, 14.4 Hz, 1H), 3.08 – 2.61 (m, 7H), 2.45 (s, 3H), 2.35 (d, *J* = 3.4 Hz, 4H), 2.03 (s, 1H), 1.70 (s, 3H); HRMS-ESI (m/z) Calcd for (C<sub>42</sub>H<sub>42</sub>ClN<sub>8</sub>O<sub>4</sub>S) ([M+H]<sup>+</sup>): 789.2738; found: 789.2733.

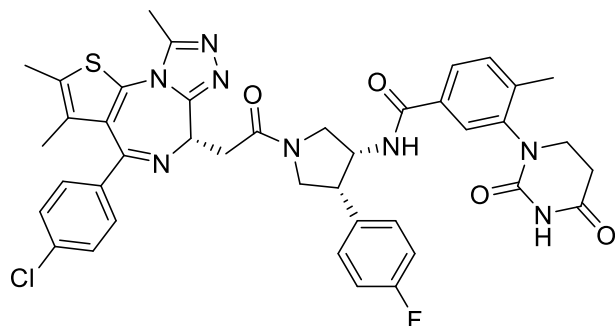

***N*-(3*R*,4*R*)-1-(2-((*S*)-4-(4-chlorophenyl)-2,3,9-trimethyl-6*H*-thieno[3,2-*f*][1,2,4]triazolo[4,3-*a*][1,4]diazepin-6-yl)acetyl)-4-(4-fluorophenyl)pyrrolidin-3-yl)-3-(2,4-dioxotetrahydropyrimidin-1(2*H*)-yl)-4-methylbenzamide (S20)**. Purified standard synthesized using General Procedure B with tDHU-NHS to give title compound (36 mg, 58% yield, 90% purity). <sup>1</sup>H NMR (400 MHz, DMSO, NH silent, 1H masked by DMSO) δ 10.83 (s, 1H), 7.83 – 7.64 (m, 2H), 7.59 – 7.14 (m, 6H), 7.10 – 7.00 (m, 2H), 5.06 (dt, J = 11.7, 5.7 Hz, 1H), 4.81 (d, J = 28.4 Hz, 1H), 4.65 (td, J = 5.3, 2.2 Hz, 3H), 4.42 – 4.03 (m, 1H), 3.95 – 3.31 (m, 5H), 2.92 – 2.75 (m, 1H), 2.70 – 2.55 (m, 4H), 2.52 (d, J = 1.9 Hz, 2H), 2.43 (s, 3H), 2.15 – 1.95 (m, 1H), 1.66 (d, J = 4.9 Hz, 3H); HRMS-ESI (m/z) Calcd for (C<sub>41</sub>H<sub>39</sub>ClFN<sub>8</sub>O<sub>4</sub>S) ([M+H]<sup>+</sup>): 793.2482; found: 793.2491.

## VI. Assay Experimental Procedures

### BRD4-HiBiT and CellTiterGlo assays:

The HiBiT and CellTiterGlo (CTG) assays were run in parallel using the same cell line, HEK293 HiBiT-BRD4 knock in, which was purchased from Promega (CS3023269). Frozen cells were thawed in a 37 °C water bath (cryopreservation media: Gibco 12648-010). The cells were added to 10 mL growth media, DMEM (Gibco 11995-065) with 10% FBS (Gibco 16000-044), then spun down @ 1000 rpm for 4 min. The media was aspirated, and cells were re-suspended in assay media (99% DMEM 1% FBS, Gibco 10566-016, Gibco 16000-044) to a final concentration of 5x10<sup>5</sup> cells/mL. Using a multidrop combi, 20 uL of the cell suspension was dispensed into each well of columns 1-23, and 20 uL of assay media was dispensed to each well of column 24 of a 384 well assay plate (Corning 3570) (Two assay plates per compound source plate, one for the HiBiT assay, the other for the CTG assay). The assay plates were then centrifuged at 1000 rpm for 1 min and left in an incubator for 2 h (37C 5% CO<sub>2</sub>).

D2B compounds were dissolved in DMSO to a theoretical concentration of 20 mM (assuming reactions were 100% productive). 11pt, 3-fold titrations were made from each compound (20 mM theoretical starting concentration). 50 nL of compound titrations or DMSO were dosed into assay plates using an acoustic liquid handler (Echo 655). After dosing, the plates were centrifuged at 1000rpm for 1 min and returned to the incubator for 24 h.

Detecting assay plates: 30 min prior to adding detection reagents, the assay plates were removed from the incubator and allowed to equilibrate to room temperature.

HiBiT-BRD4 detection: HiBiT detection reagents were thawed and allowed to come to room temperature (Promega N3050). LgBiT protein was diluted 1:100, and Nano-Glo substrate was diluted 1:50 in lytic buffer (~9mL per plate). Using a multidrop combi, 20uL of HiBiT detection reagent were added to each well of the 384 well plate. The plate(s) were then incubated in the dark for 30 min before reading.

CTG detection: CTG reagent was thawed and allowed to come to room temperature (Promega G7571). Using a multidrop combi, 20 uL of CTG reagent were added to each well of the 384 well plate. The plate(s) were then incubated in the dark for 30 min before reading.

Detection: Luminescence was read on a PHERAstar FSX using the LUM plus setting with a 0.2 second measurement interval.

## **CRBN-tracer NanoBRET assay:**

### *Generation of assay ready cells:*

The CRBN-tracer nanoBRET assay was run using frozen assay ready transiently transfected cells. To generate assay ready cells, HEK293 cells were grown in T225 flasks with growth media (DMEM (Gibco 10566-016) with 10% FBS (Gibco 16000-044)). To harvest cells, the media was aspirated, then each flask was rinsed with 10mL PBS (Corning, 21-040-CV). 4 mL of warm 0.05% trypsin (Corning 25-051-CI) was added to each plate and incubated at 37C for 3 minutes. 10ml of growth media was added to each flask, and cells were dispersed. The cells were transferred to centrifuge tubes and spun down at 1000rpm for 5 min. The media was aspirated, and the cells were resuspended in growth media to a concentration of 400,000 cells/mL. A 20x transfection mix of Lipid:DNA complexes using plasmids encoding NanoLuc-CRBN and DDB1 (Promega, CRBN-31K, DDB1-5K) was generated in optimem (Gibco 31985-070). For each mL of optimem, 18 ug of DDB1 plasmid and 2 ug of NanoLuc-CRBN was added. Then 60 uL of FuGENE was added, and the tube was gently mixed by inversion 5-10 times. This mixture was incubated at room temperature for 15 min before adding to cells (20x). Cells were grown in T225 flasks overnight and harvested and frozen the next morning. Cells were detached following the same procedure described above. After spinning down and removing the supernatant, the cells were re-suspended in cryopreservation media (Gibco 12648-010) and frozen in a corning coolcell FTS30 chiller.

### *Running the CRBN-tracer nanoBRET assay:*

This assay is run in live and permeabilized modes in parallel. For each compound source plate two assay plates are generated, one for the live mode and one for the permeabilized mode.

Dosing assay plates: 384 well assay plates (corning 3574) were dosed with CRBN-tracer (Promega CS:1810C141) using an Echo655 (25 nL for live plates 7.5 nL for permeabilized plates). Then 50 nL of 11pt, 3-fold titrations of D2B compounds were dosed to each well (20 mM theoretical starting source concentration, 50 uM starting assay concentration).

Preparing cells: Frozen transfected cells were thawed in a 37 °C water bath (cryopreservation media: Gibco 12648-010). The cells were added to 10 mL growth media, DMEM (Gibco 11995-065) with 10% FBS (Gibco 16000-044), then spun down @ 1000 rpm for 4 min. The media was aspirated, and cells were re-suspended in warm optimem without phenol red (Gibco 11058-021) to 500,000 cells/mL.

Adding cells to assay plates: Using a multidrop combi 20 uL of cells were added to the live cell plate(s), and 18 uL of cells were added to the permeabilized plate(s). The plates were spun down at 1000 rpm for 1 min. The live cell plates were incubated at 37 °C for 2 hr. 2 uL of 0.5 mg/mL digitonin (MP Biomedicals 0215948082) in optimem (Gibco 11058-021) was added to each well of the permeabilized plate (50 ug/mL digitonin was dissolved in DMSO, this stock was diluted in optimem to generate a 0.5mg/mL stock). The permeabilized centrifuged at 1000rpm for 1 min and incubated at room temp for 30 min.

Detection: after their incubation periods, 10 uL of 3X nanoBRET detection reagent was added to each well (Promega N2161). For the permeabilized plate nanoBRET Glo substrate was diluted 1:166 in optimem. For the live cell plate, nanoBRET Glo substrate was diluted 1:166 and

extracellular inhibitor was diluted 1:500 in optimum. The plates were centrifuged at 1000 rpm for 1 min then detected using a PHERAstar FSX using LUM 2007H1 module (610-LP, 450-480nm).

*Table S5. Performance statistics of assays evaluated in D2B workflow*

|                                           | Average RZ' | Average S/B | min RZ' | min S/B | Ctrl compd. IC50 (StDev) |
|-------------------------------------------|-------------|-------------|---------|---------|--------------------------|
| HiBiT-BRD4 (ZXH-3-26) <sup>3</sup>        | 0.89        | 538.77      | 0.84    | 291.9   | 4.1 nM (0.18nM)          |
| CellTiterGlo                              | 0.92        | 344.52      | 0.88    | 146.9   |                          |
| CRBN nanoBRET - Live (CC885) <sup>4</sup> | 0.78        | 4.65        | 0.66    | 4.36    | 10 nM (1.2 nM)           |
| CRBN nanoBRET - Perm (CC885) <sup>4</sup> | 0.71        | 3.46        | 0.63    | 3.11    | 18 nM (2.9 nM)           |

## VII. NMR Spectra

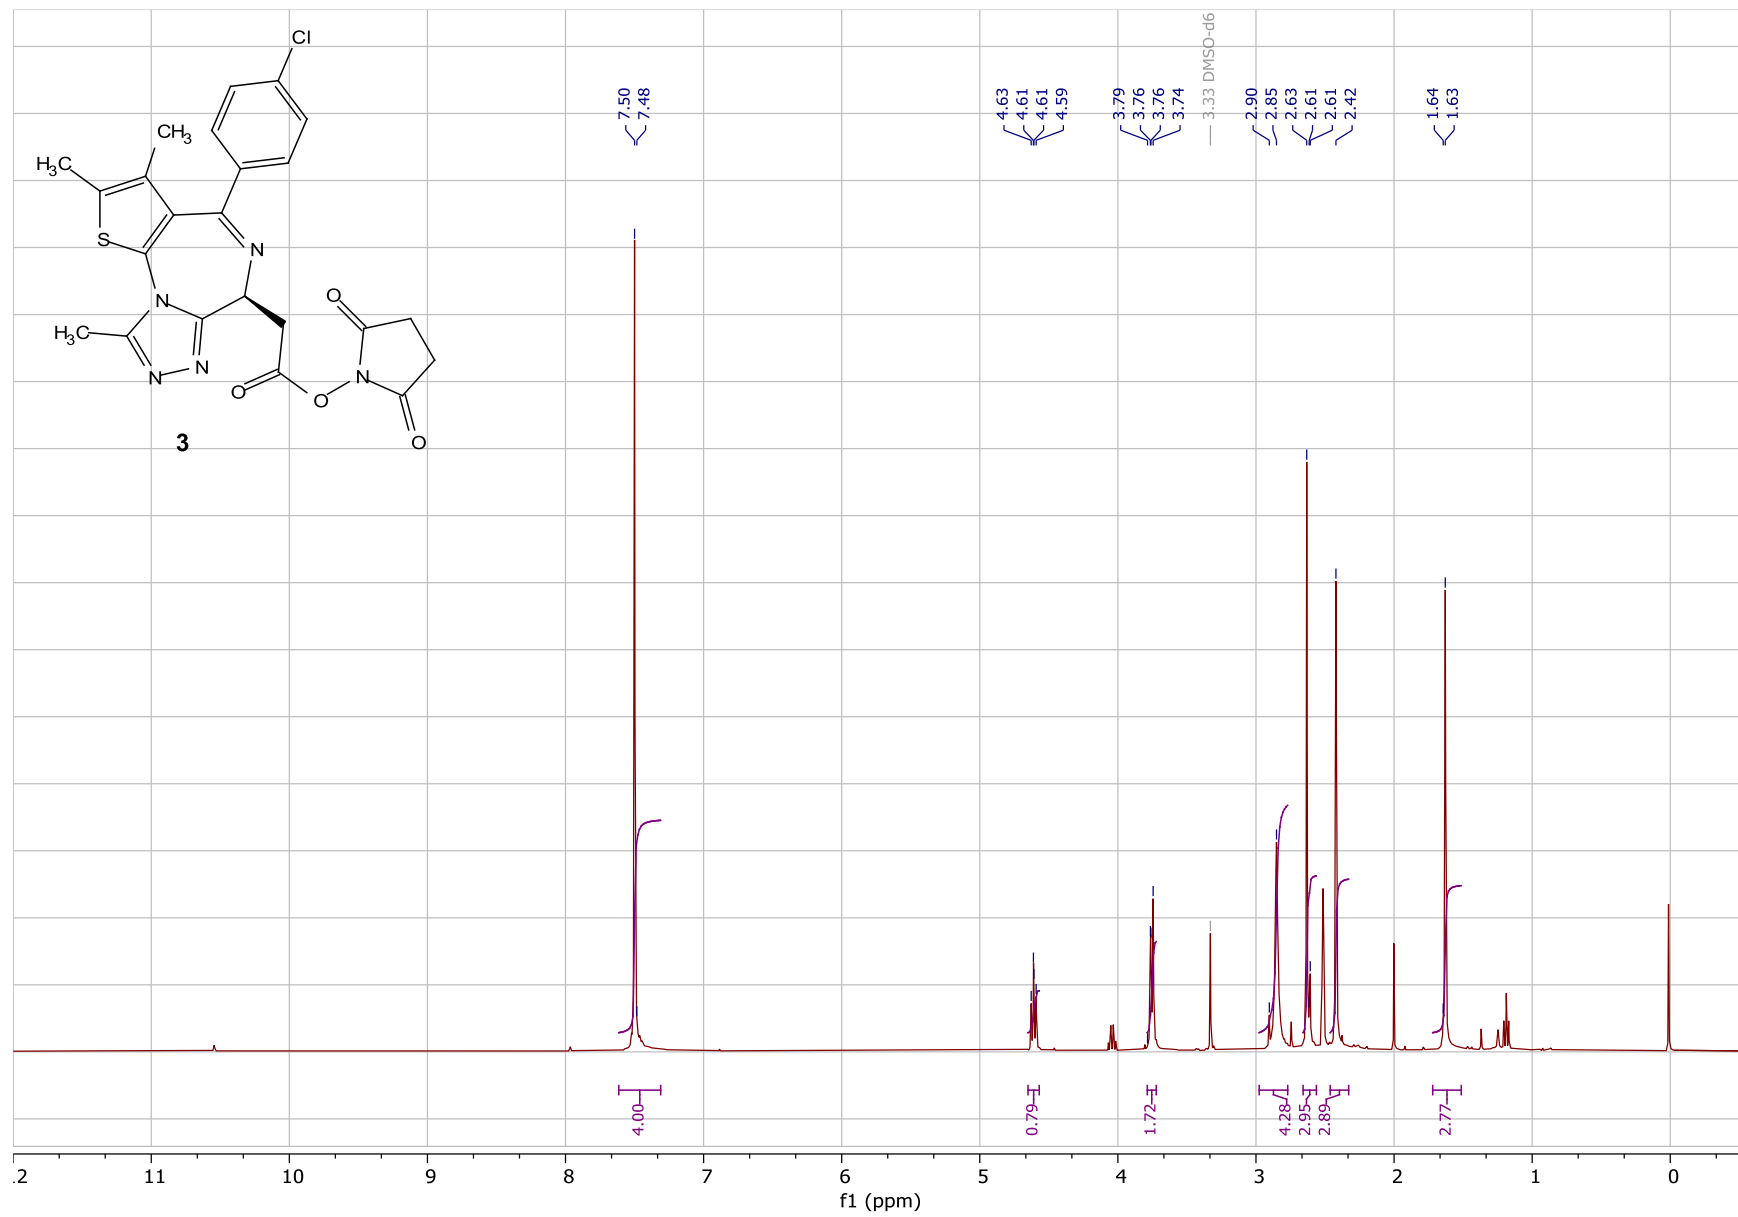

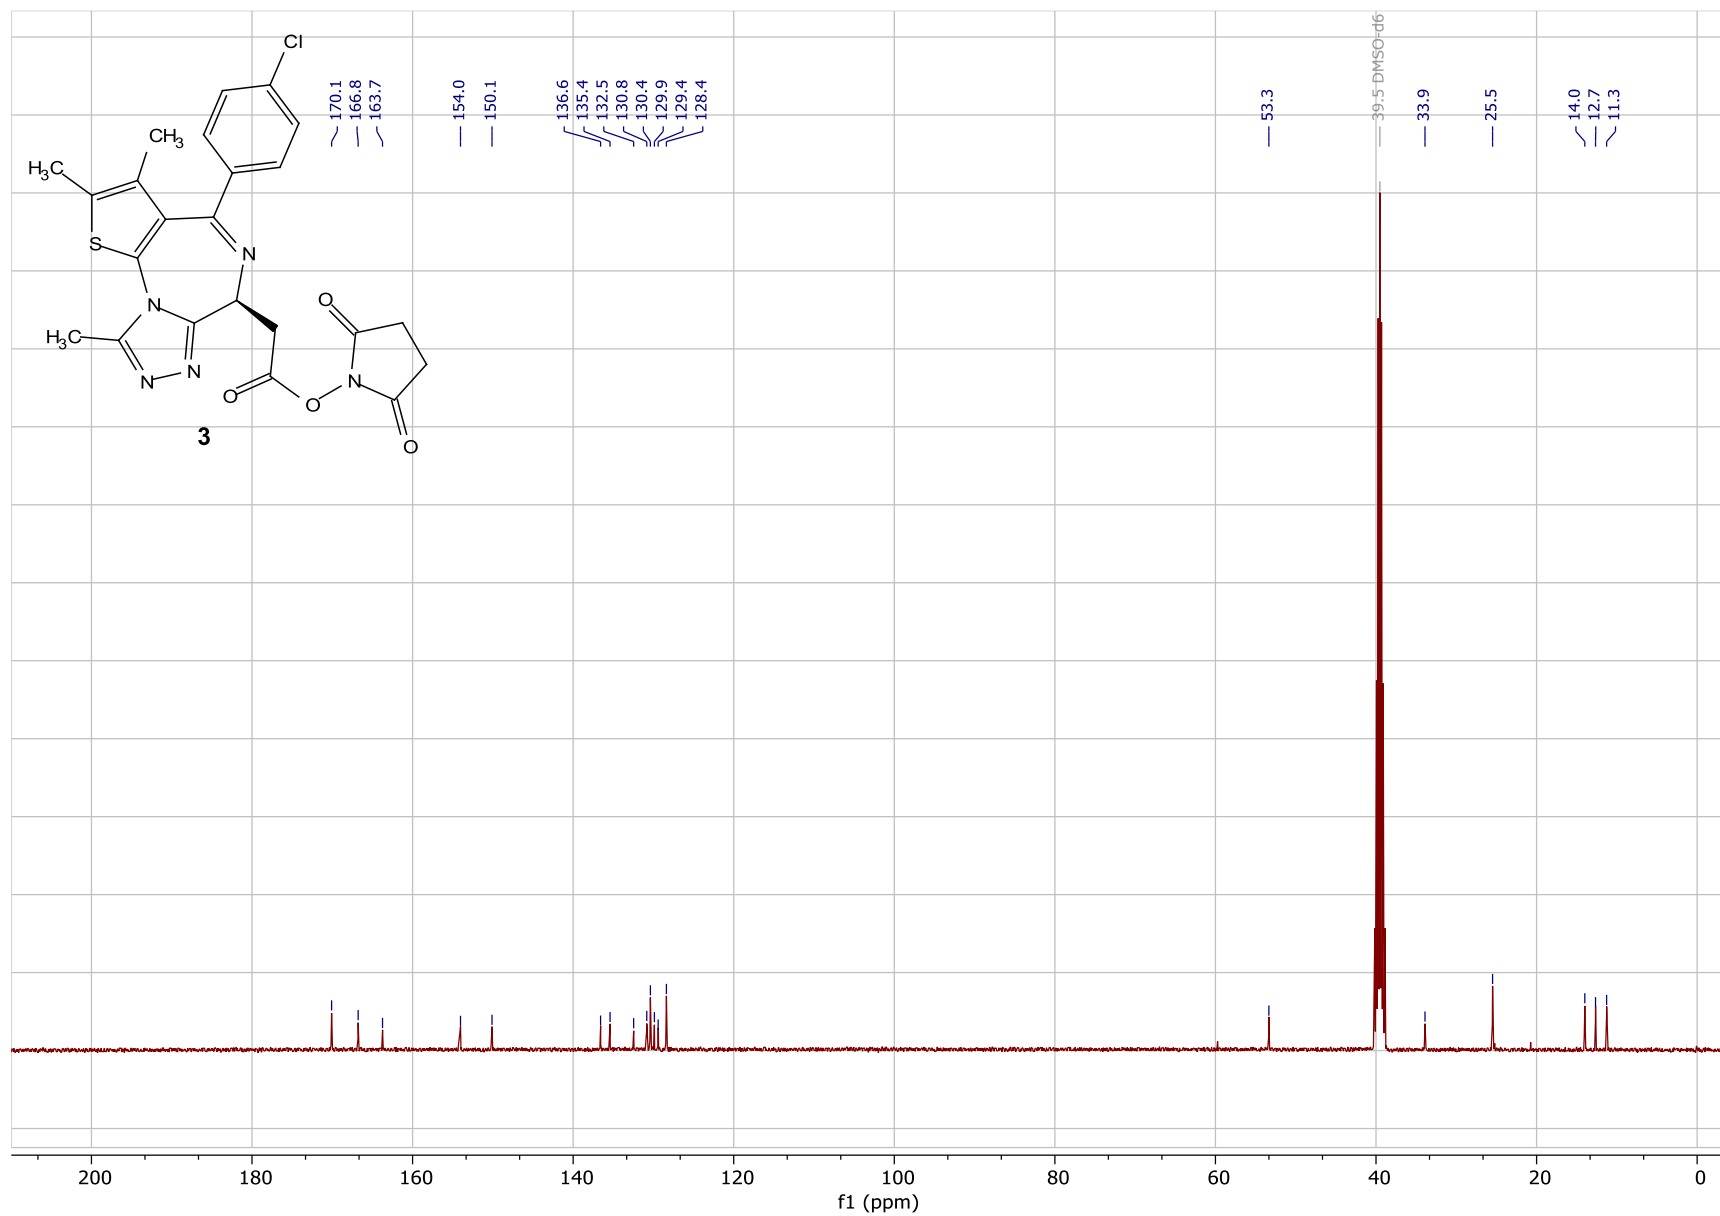



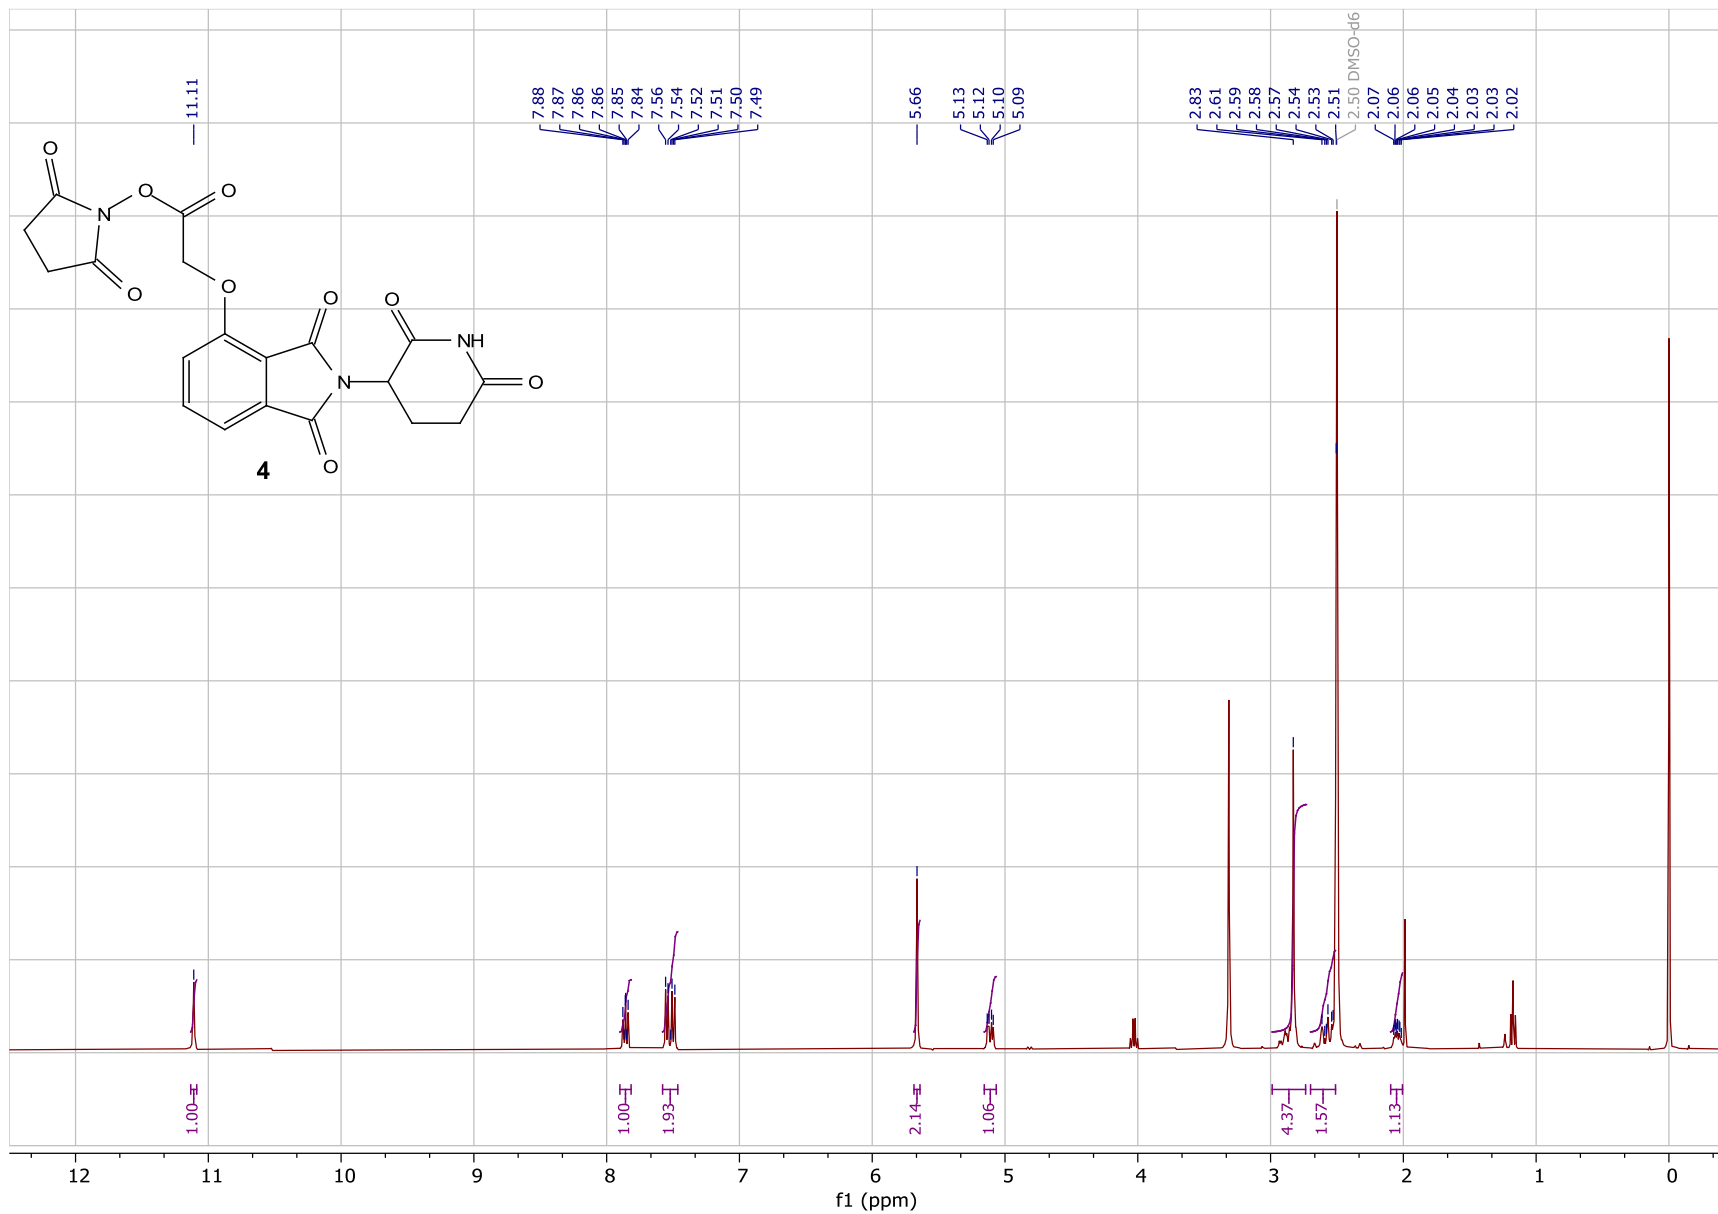

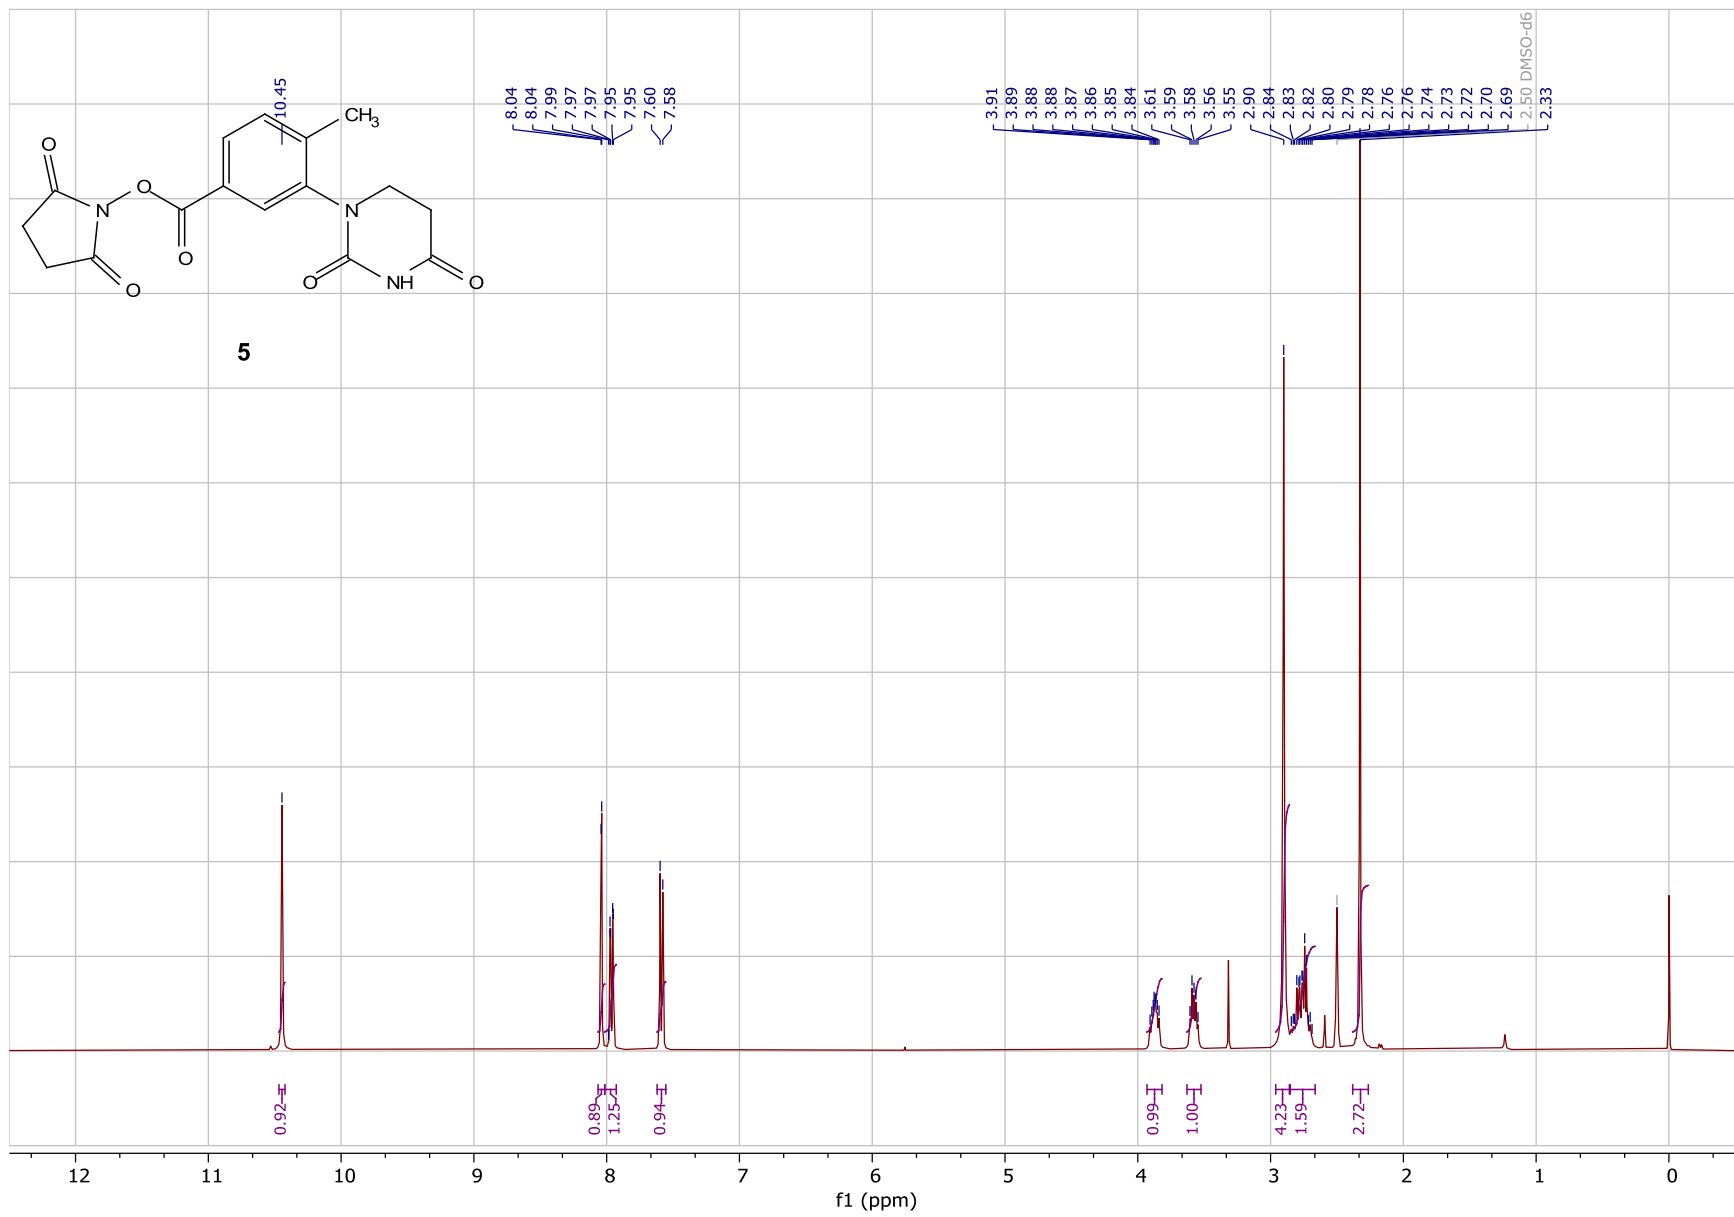

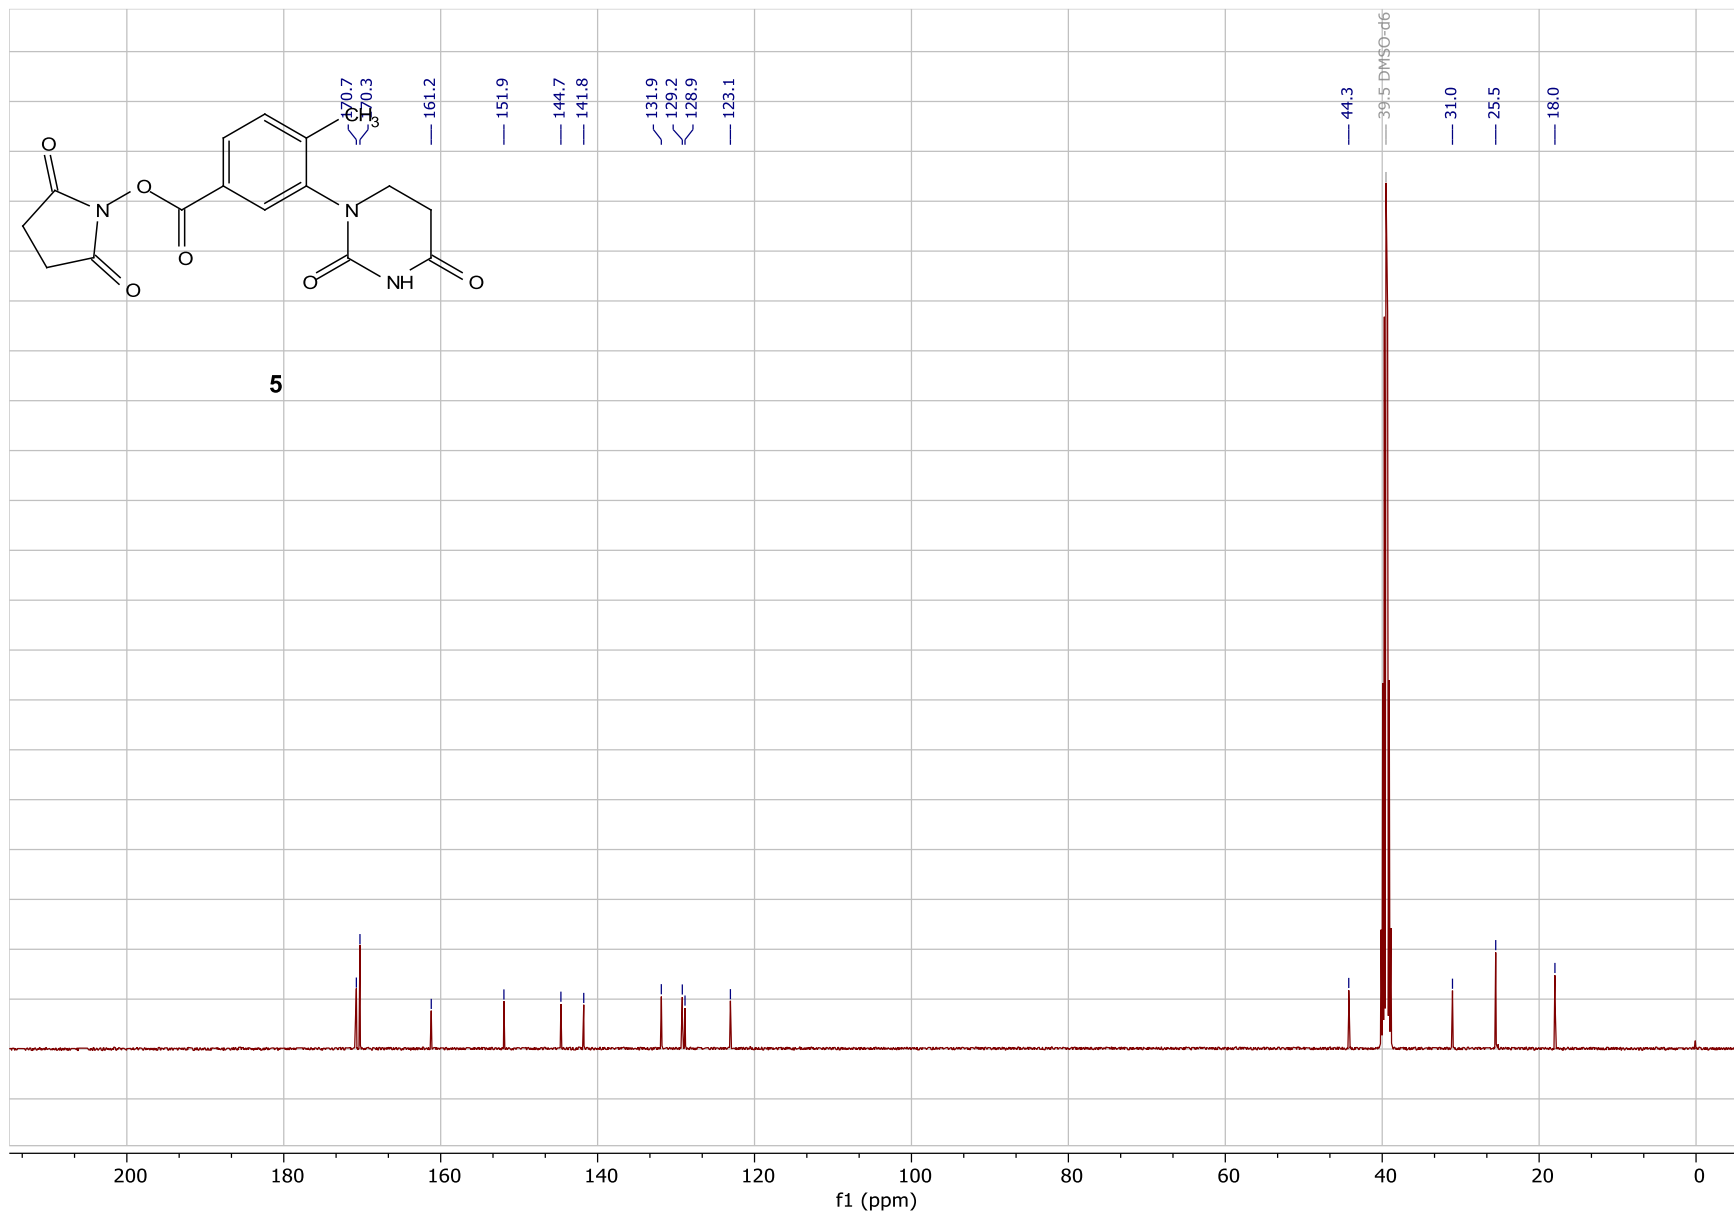

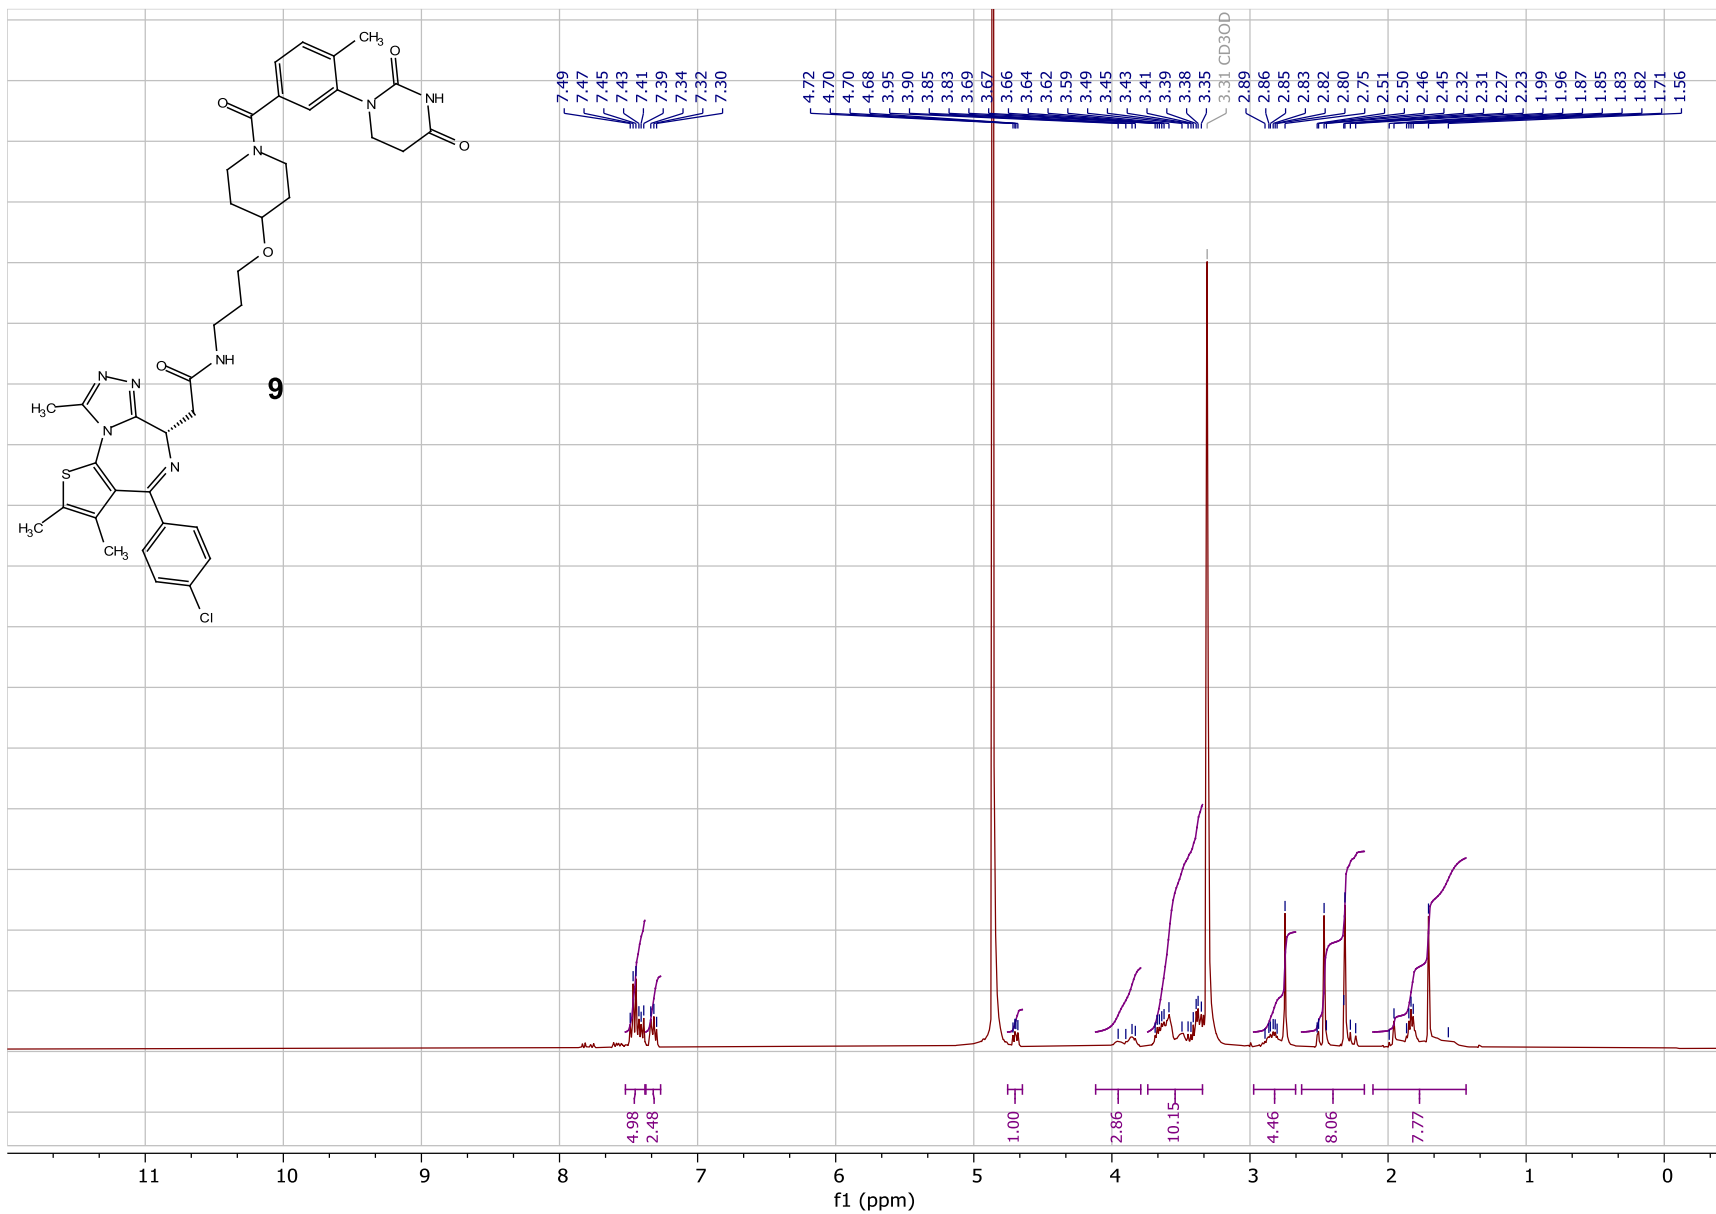

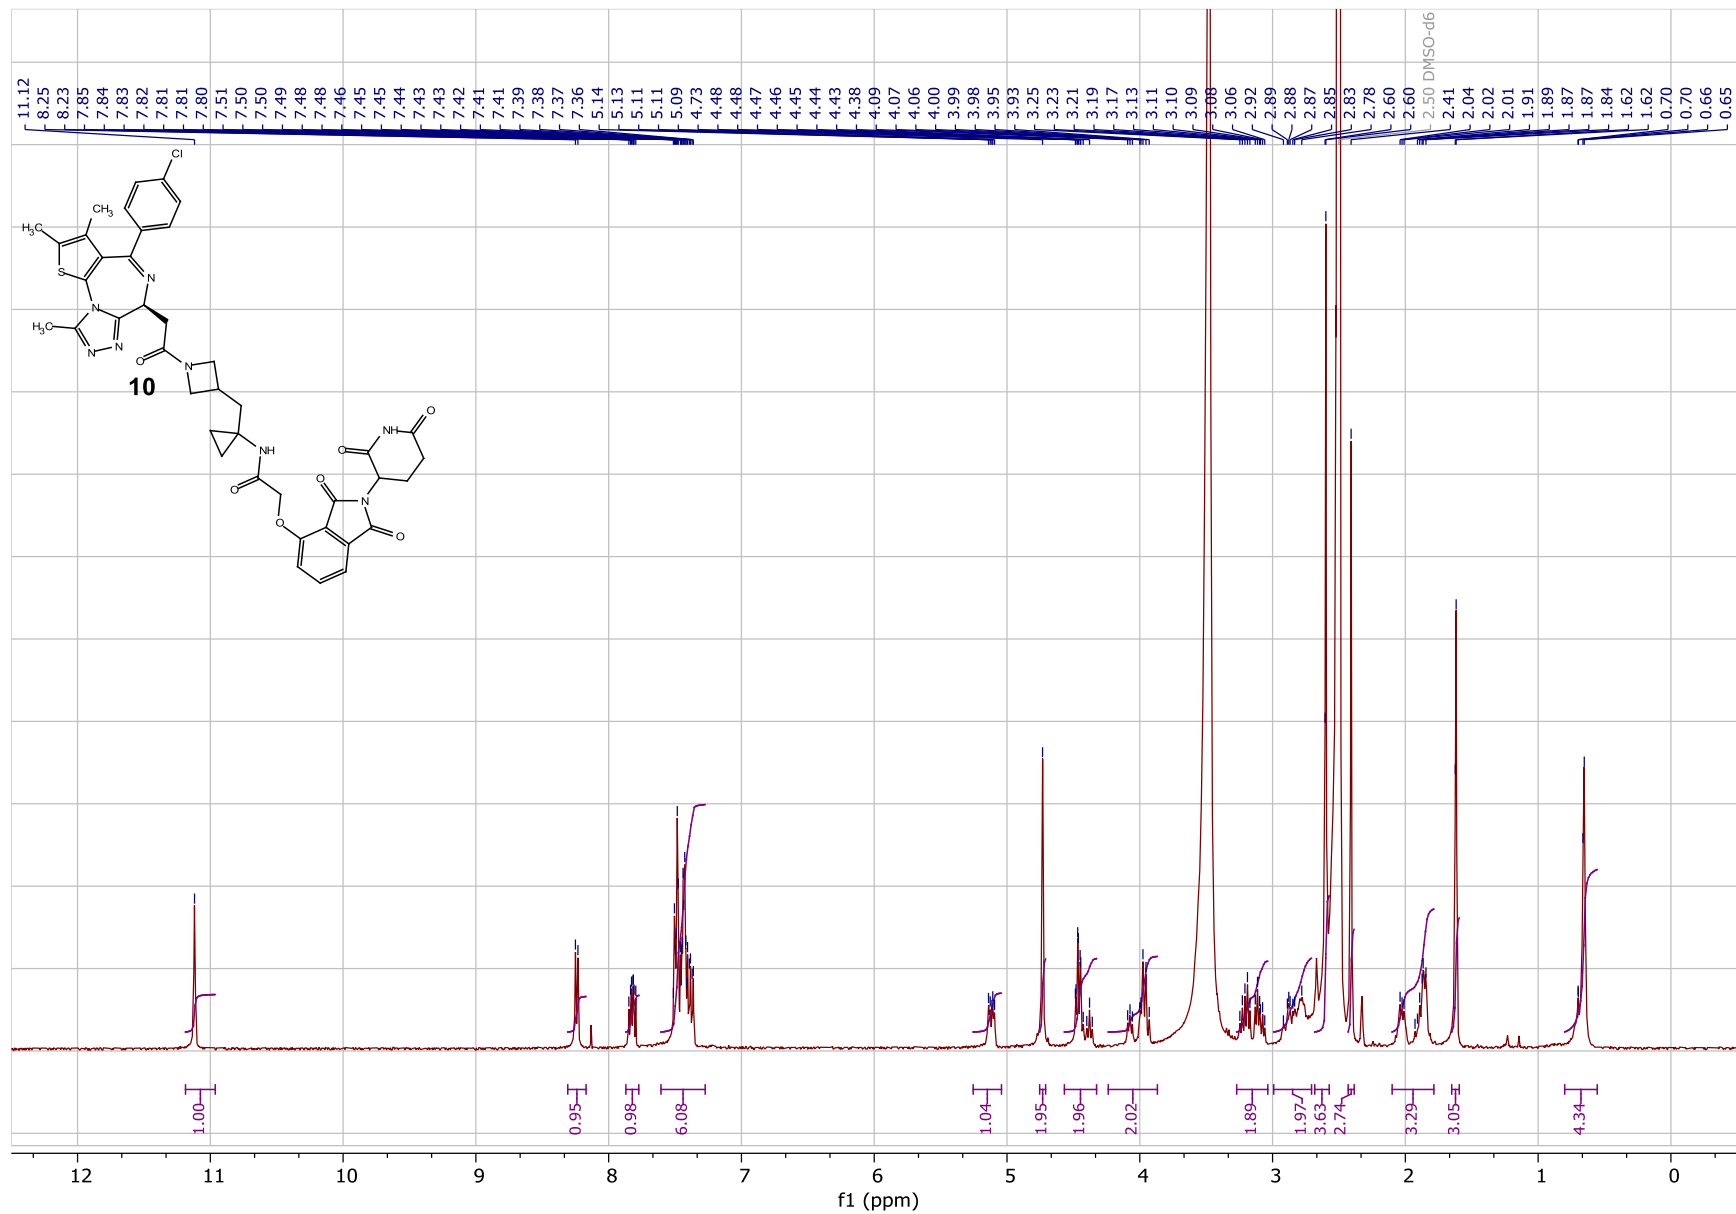

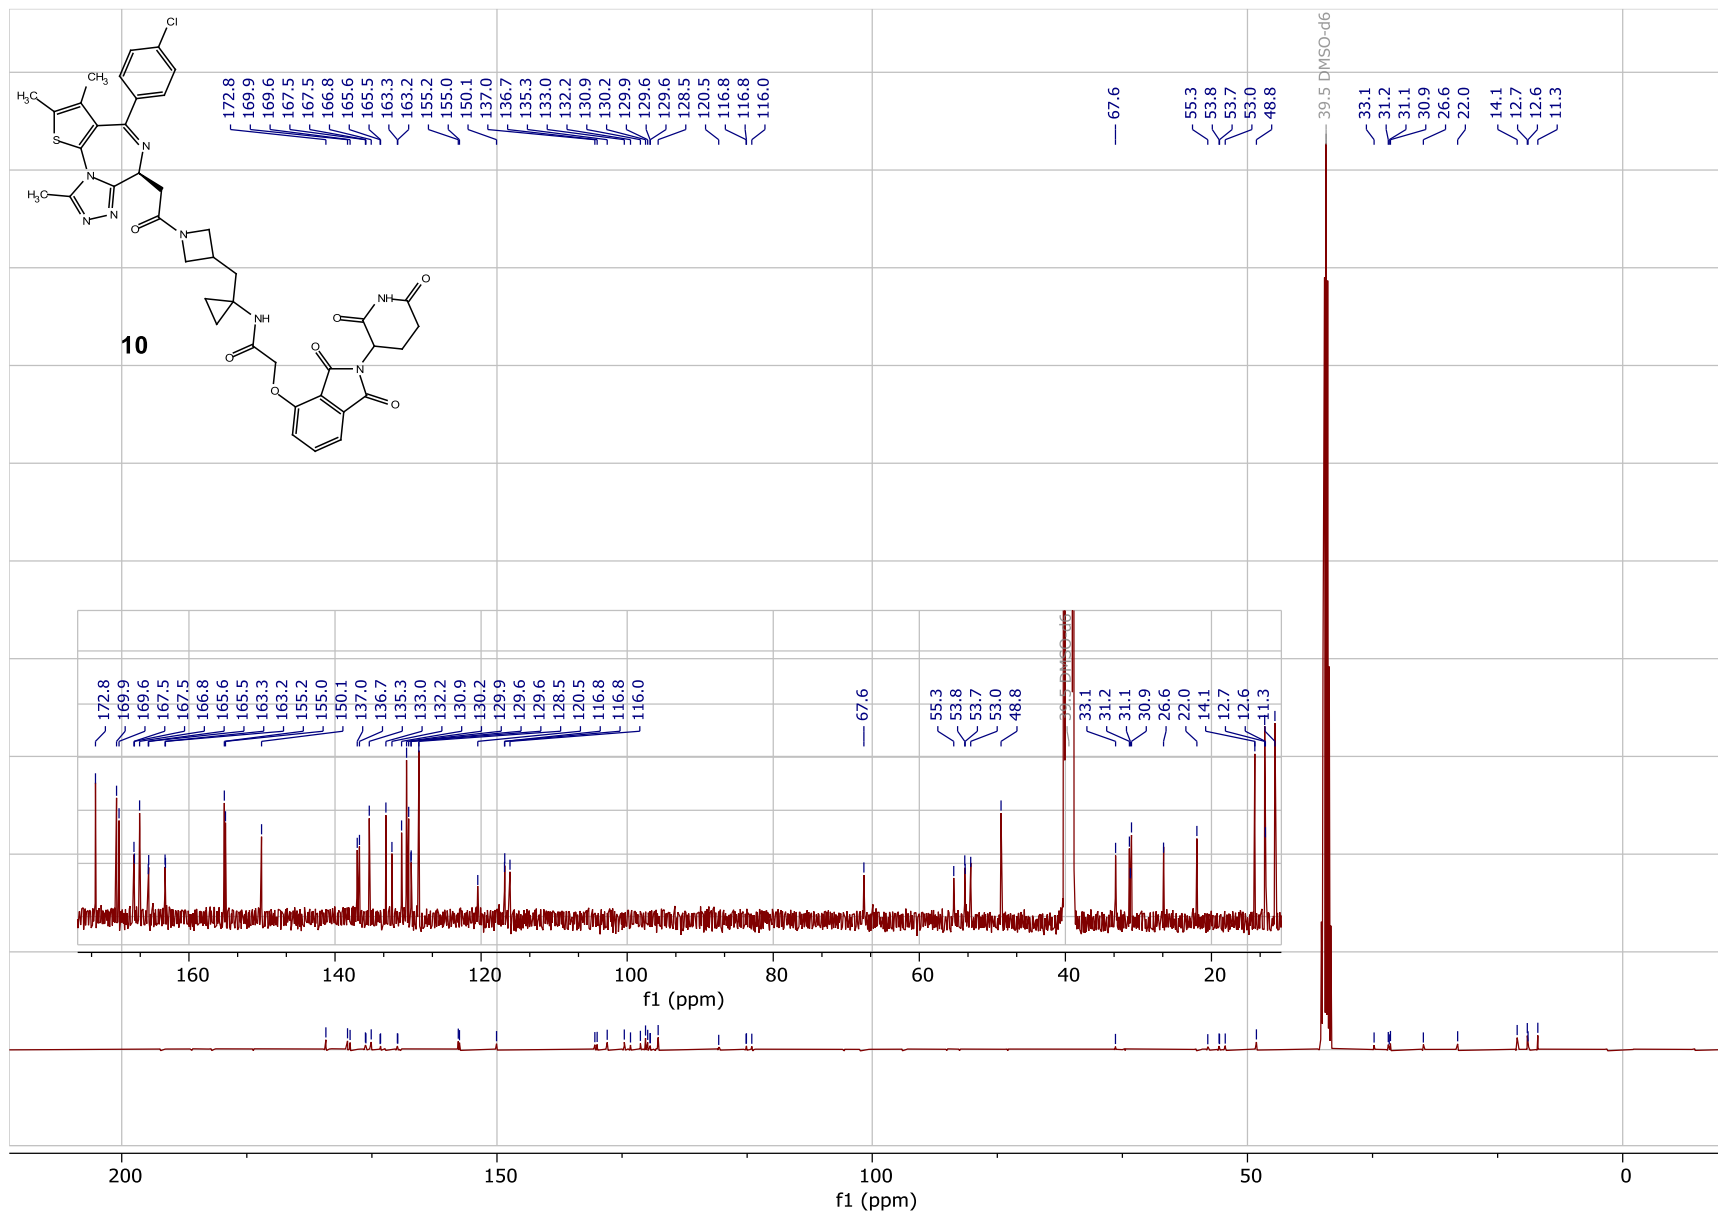

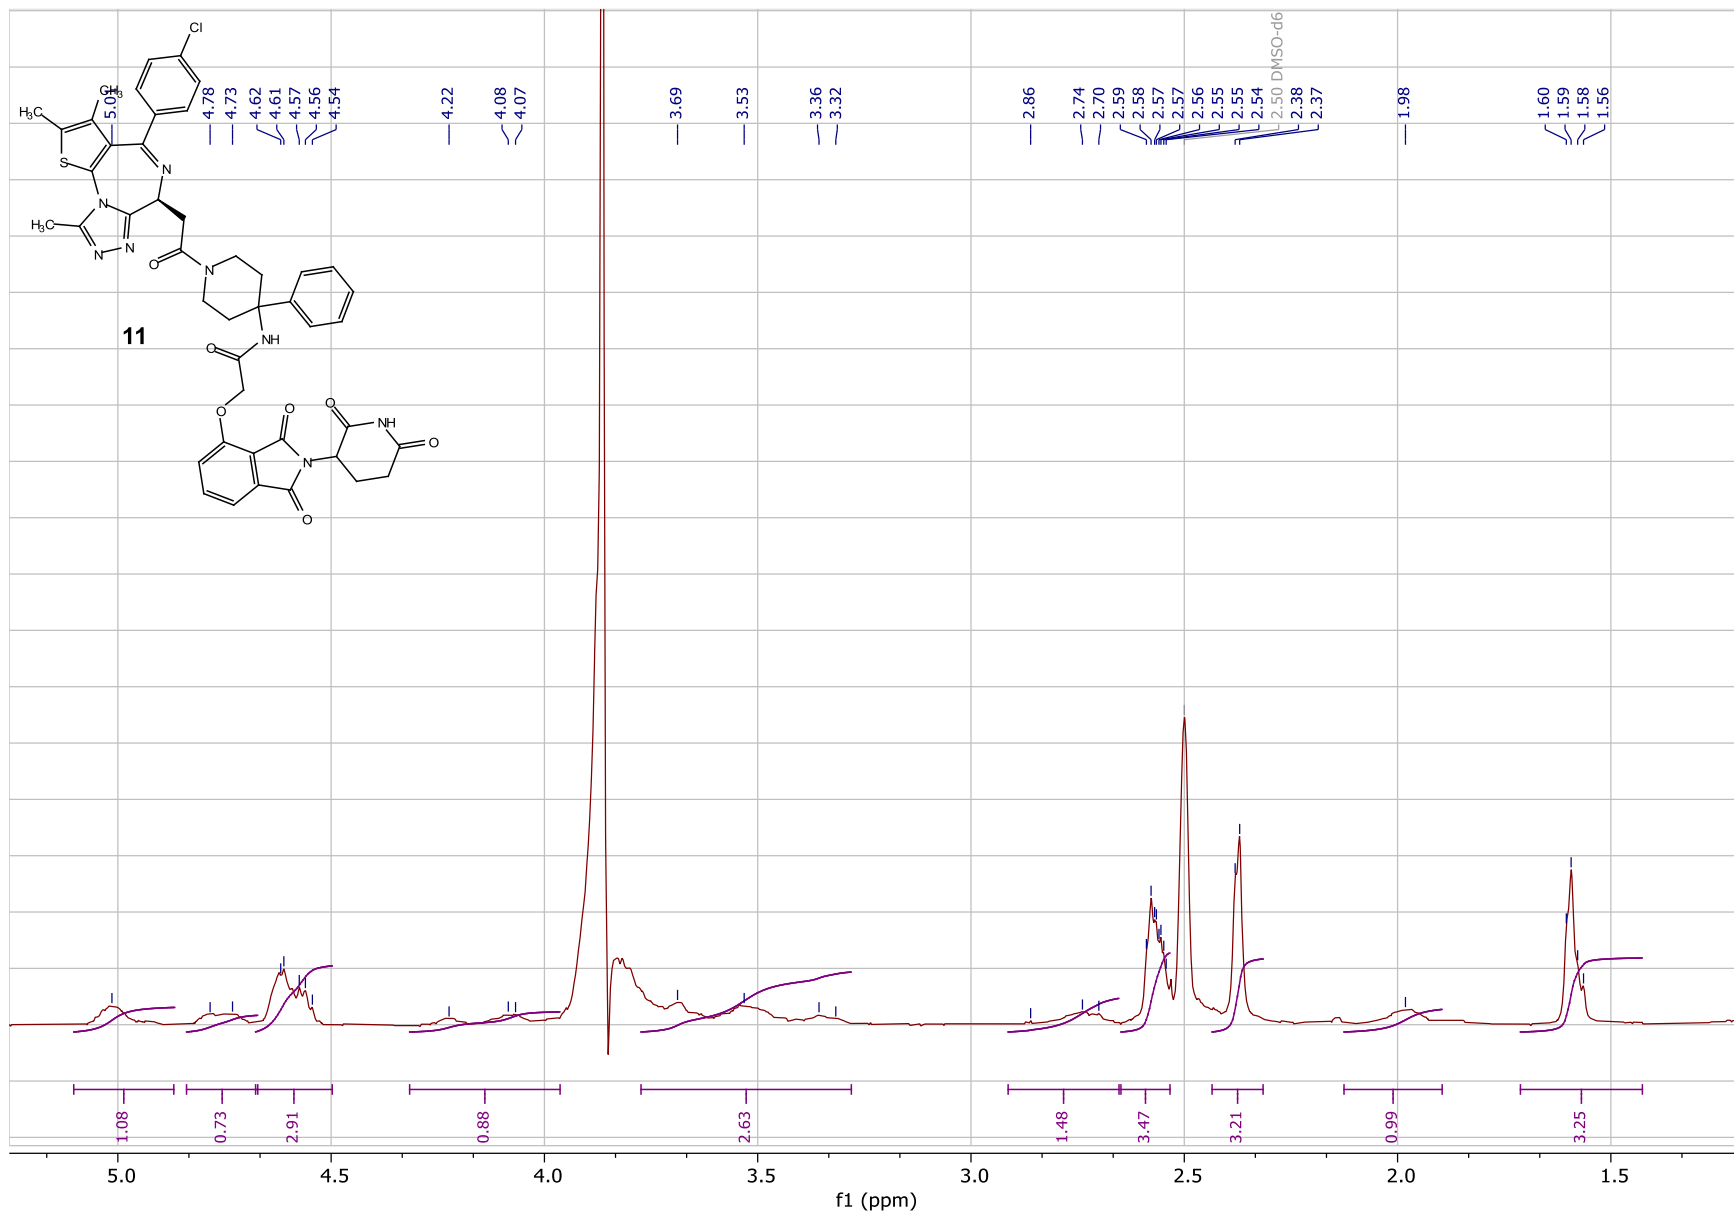

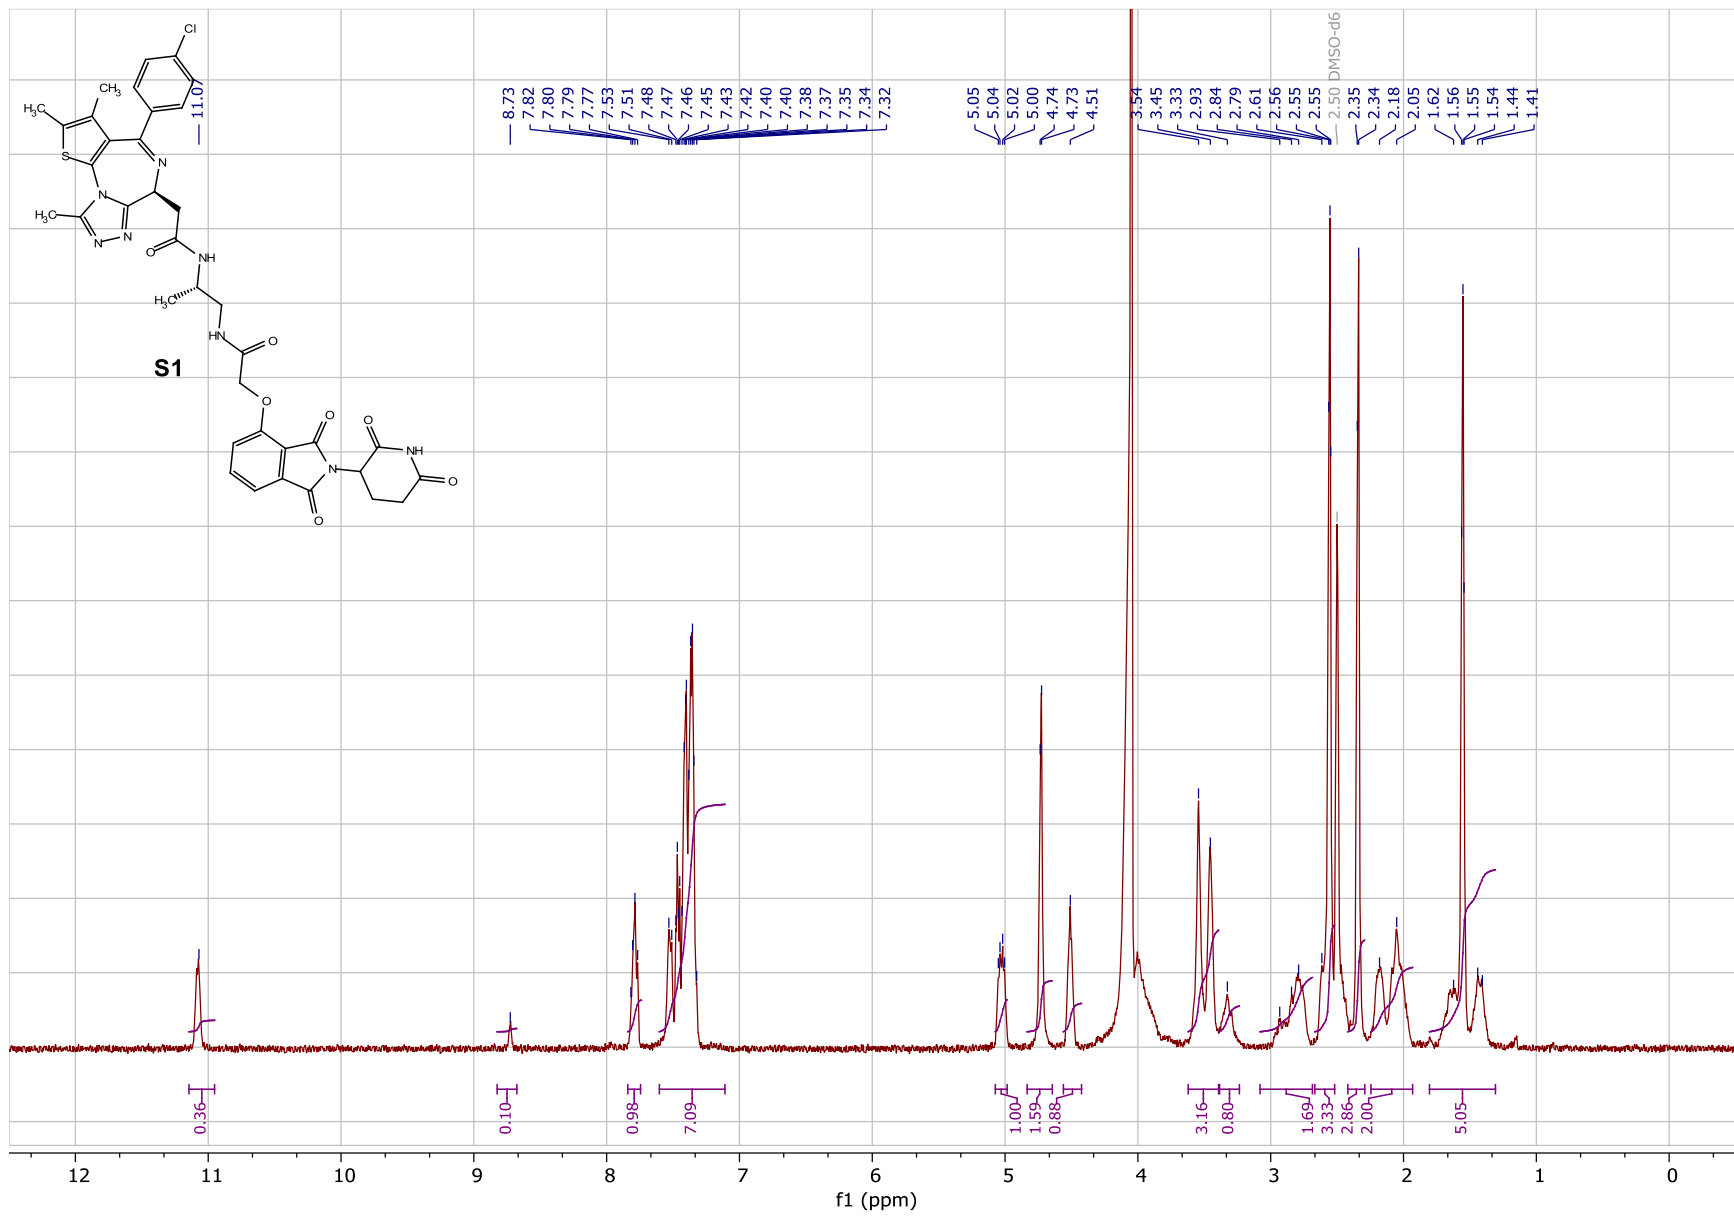



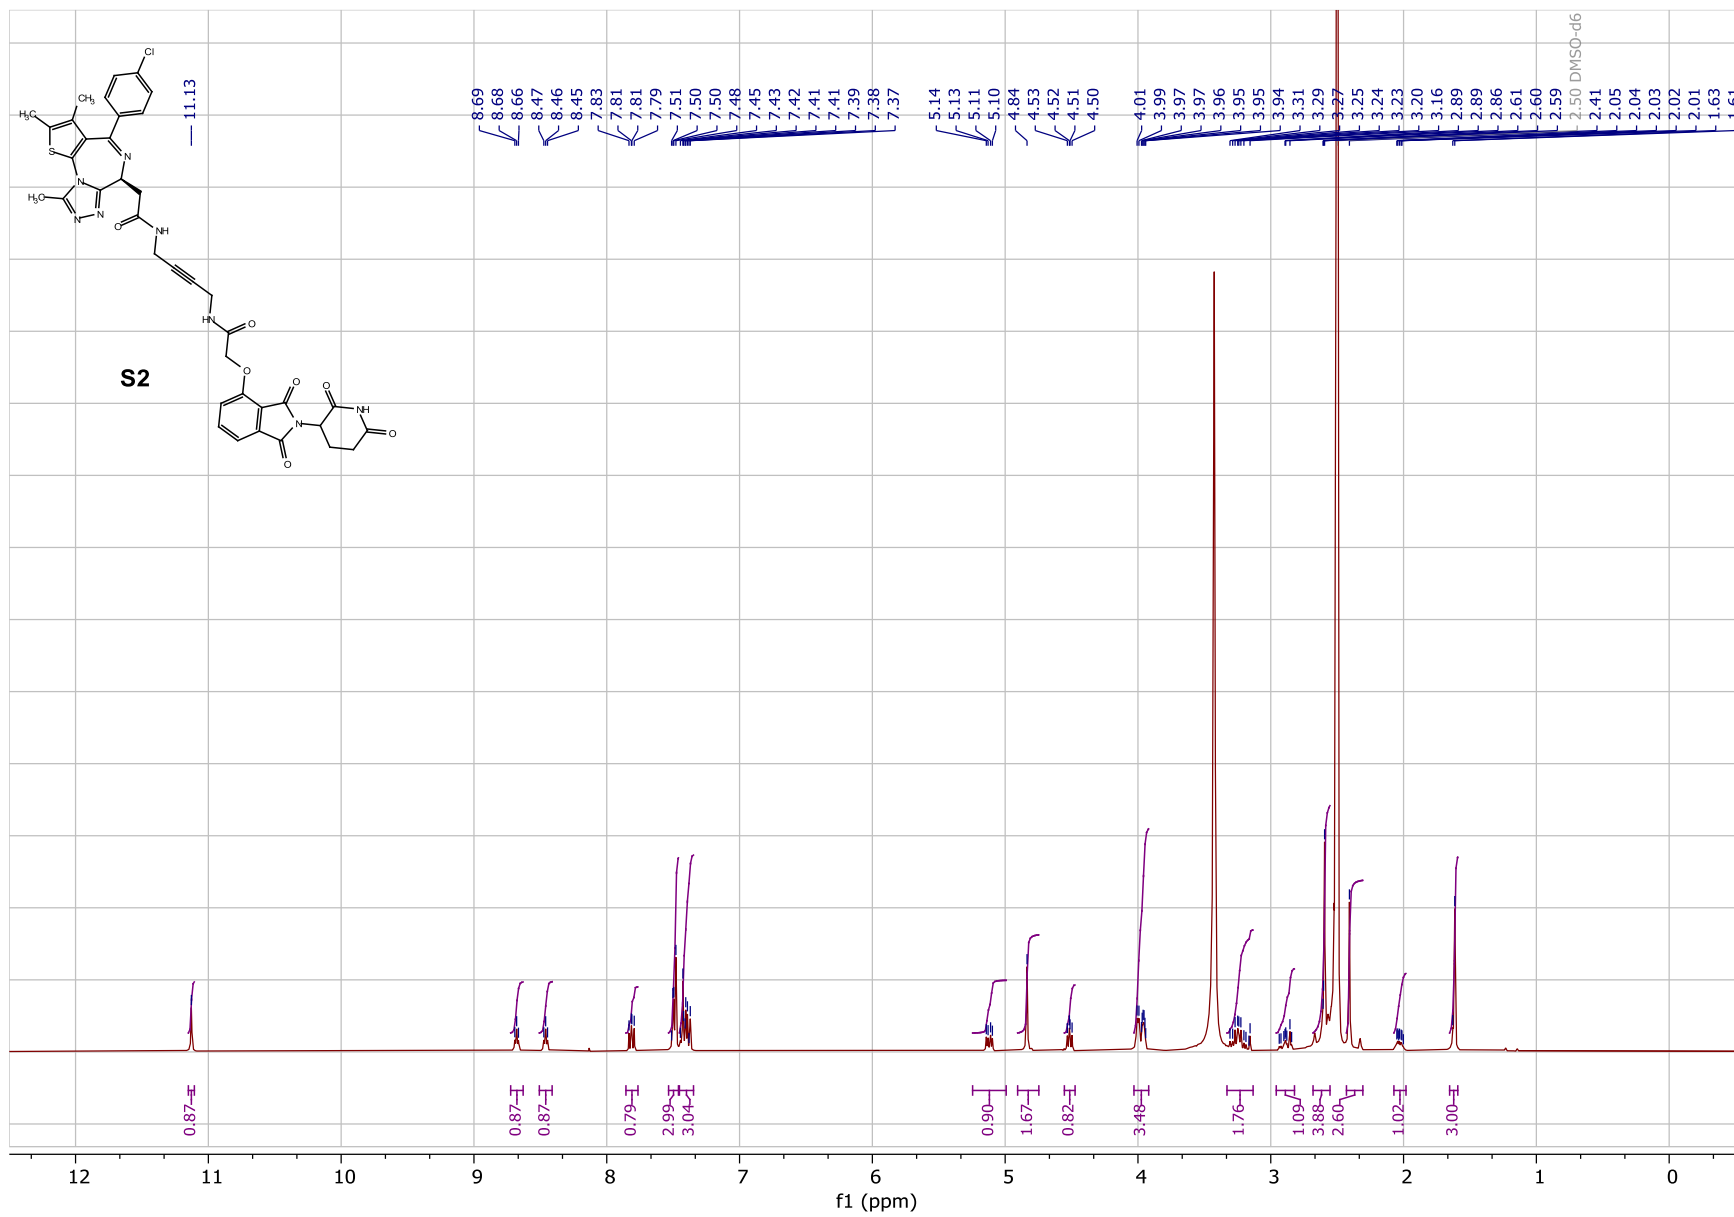

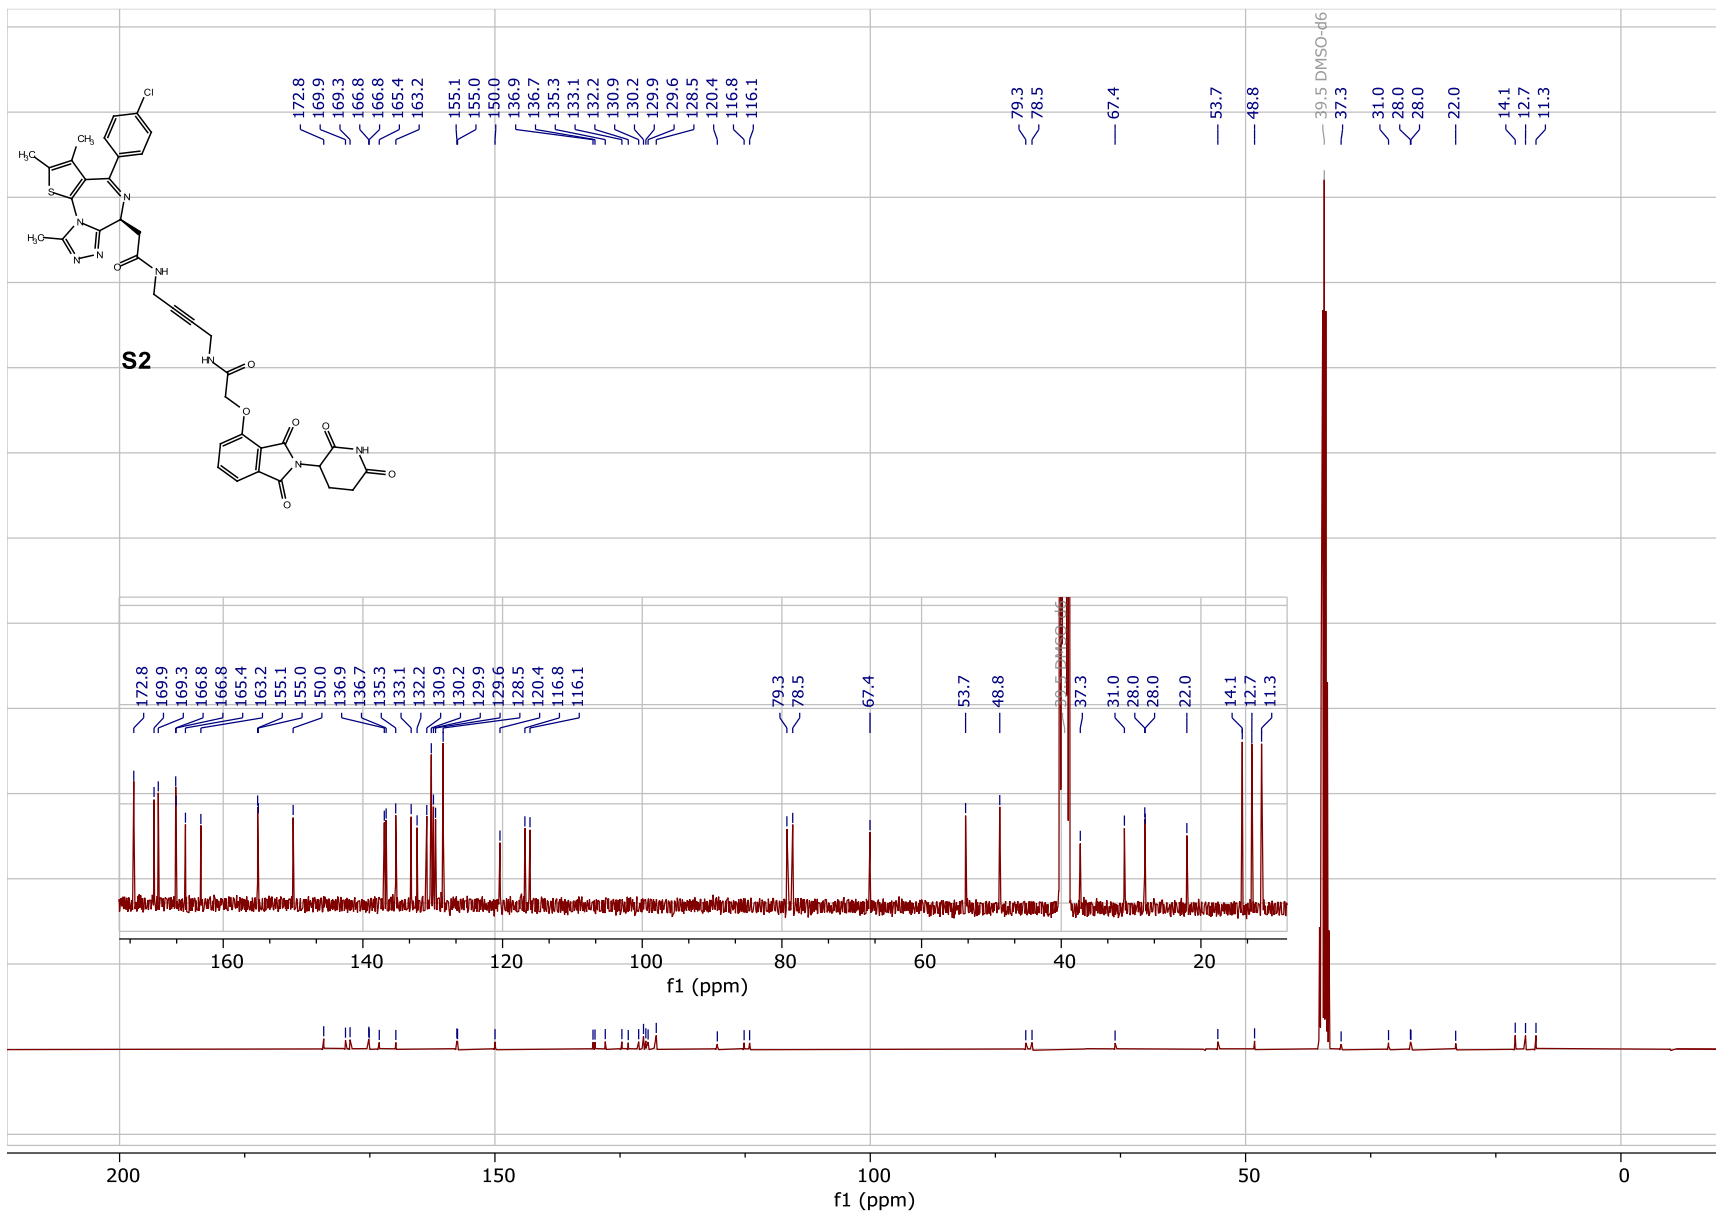

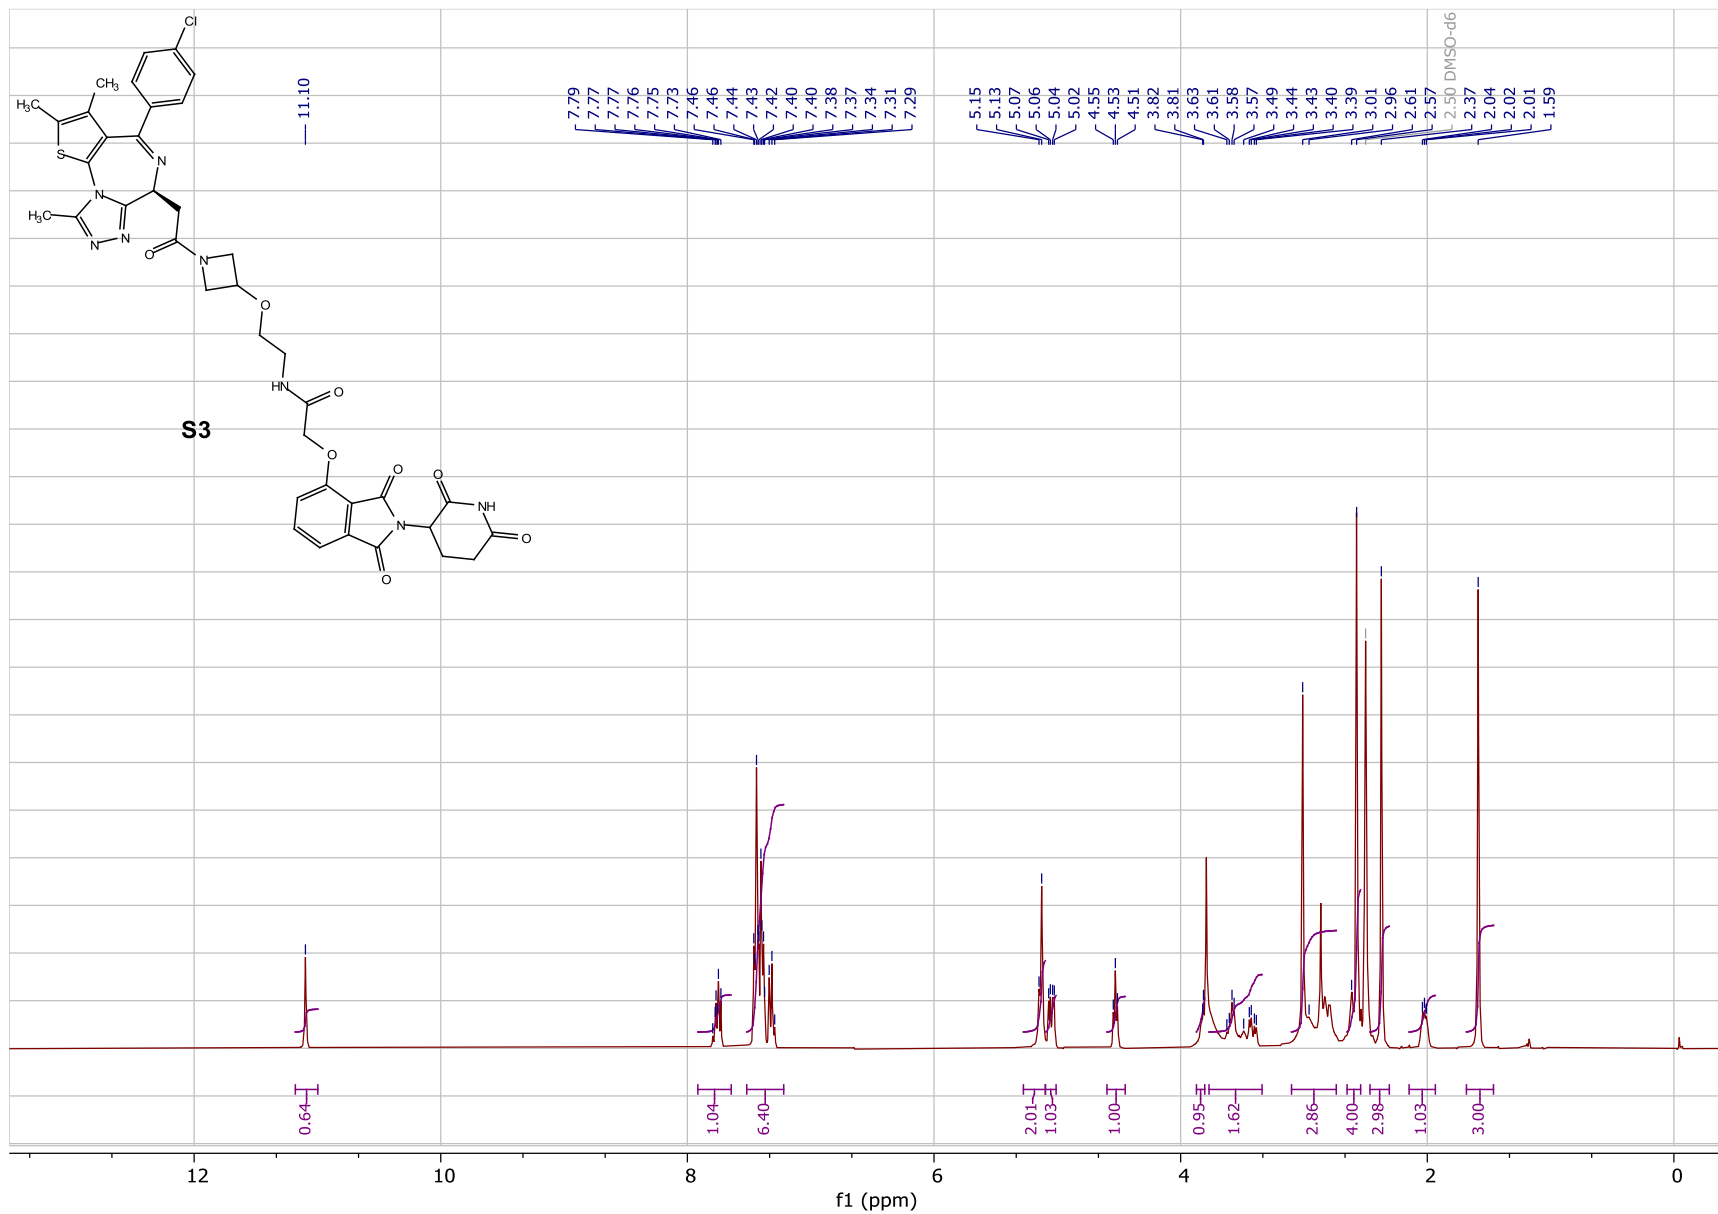

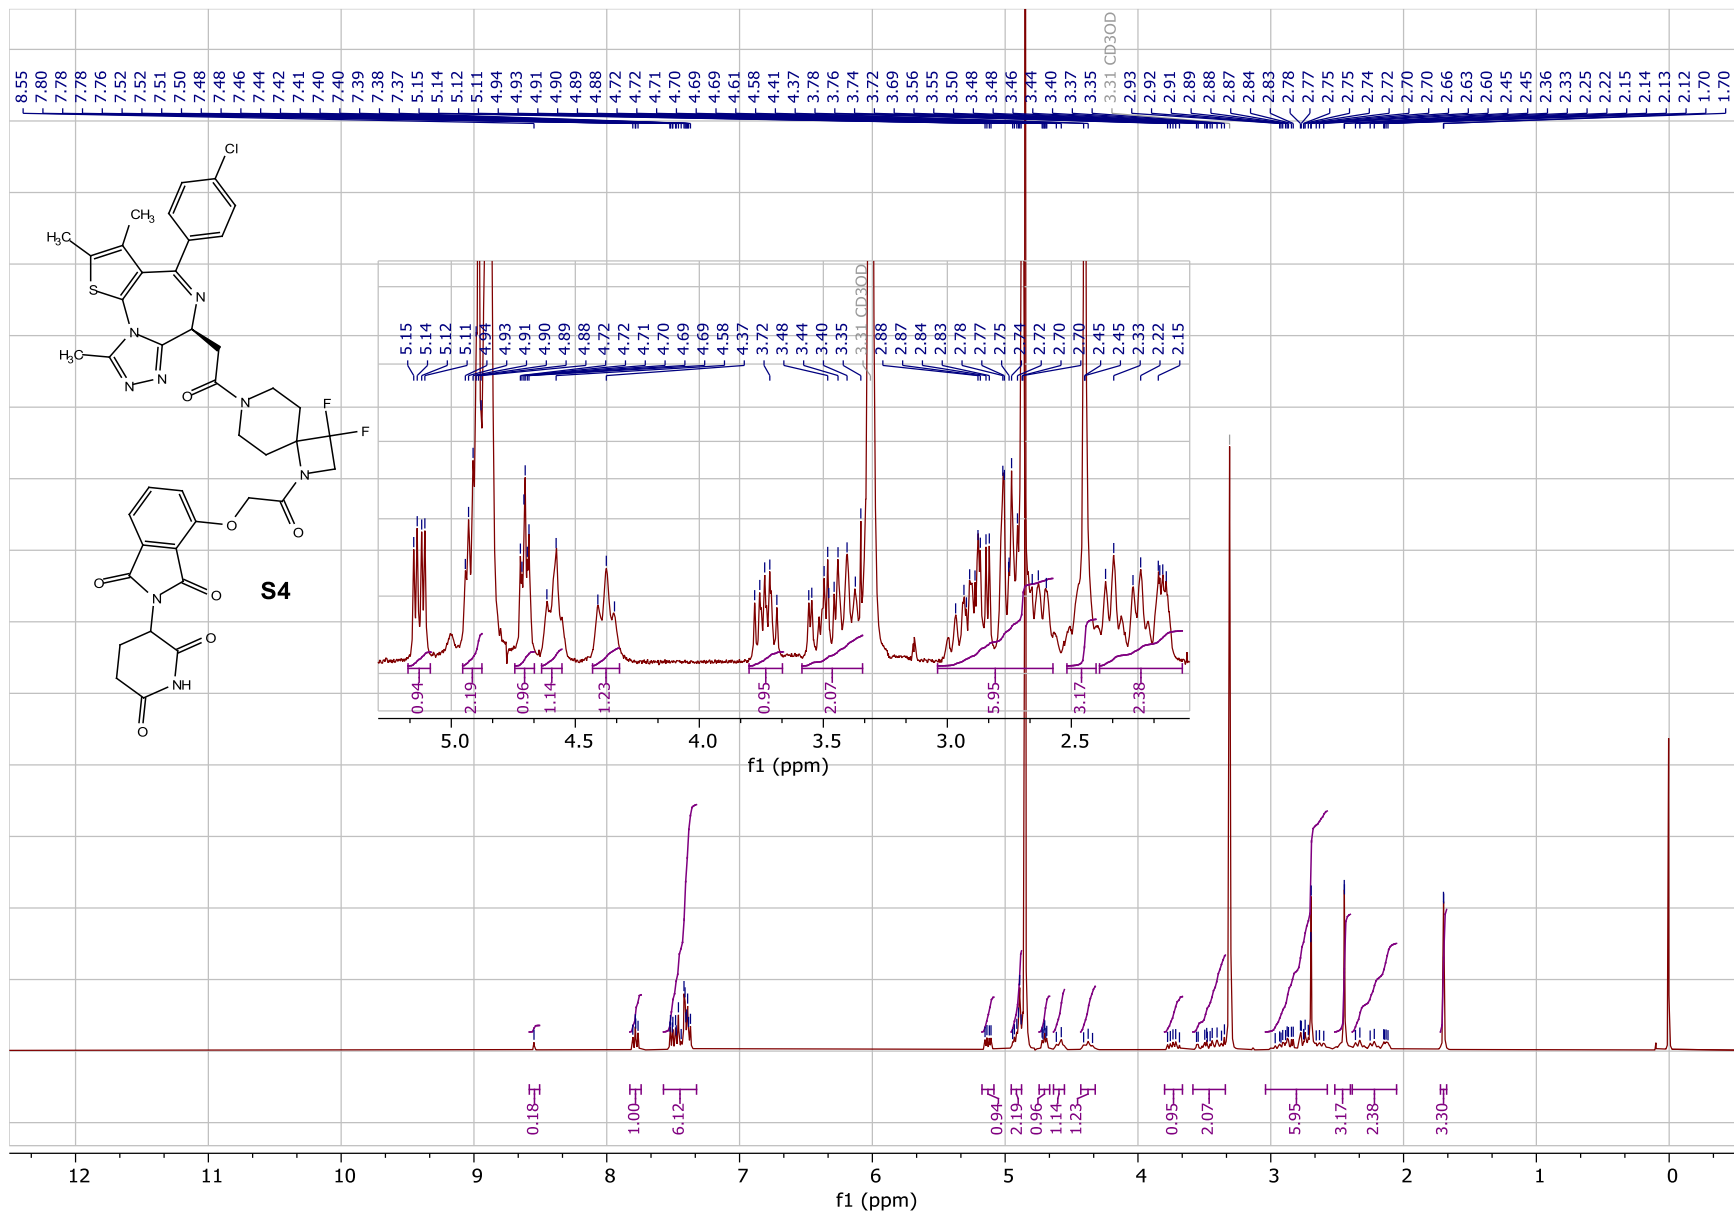

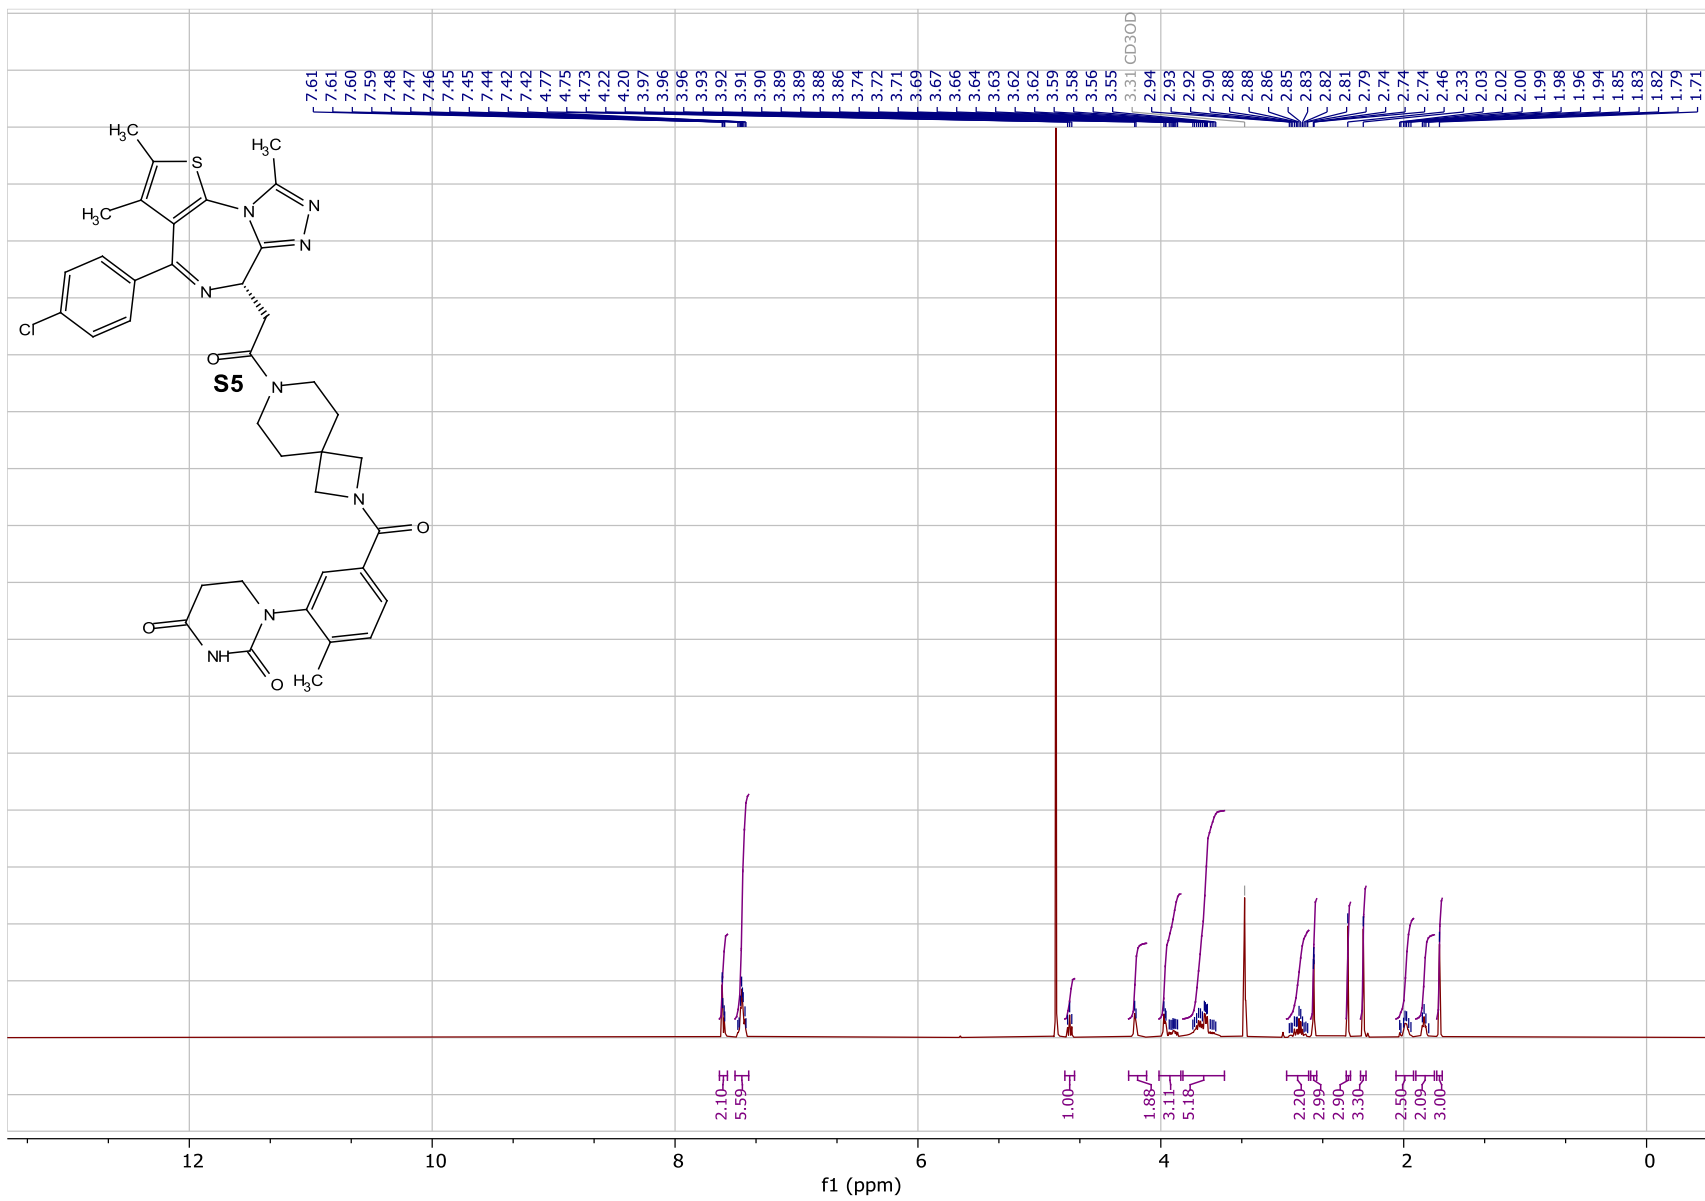

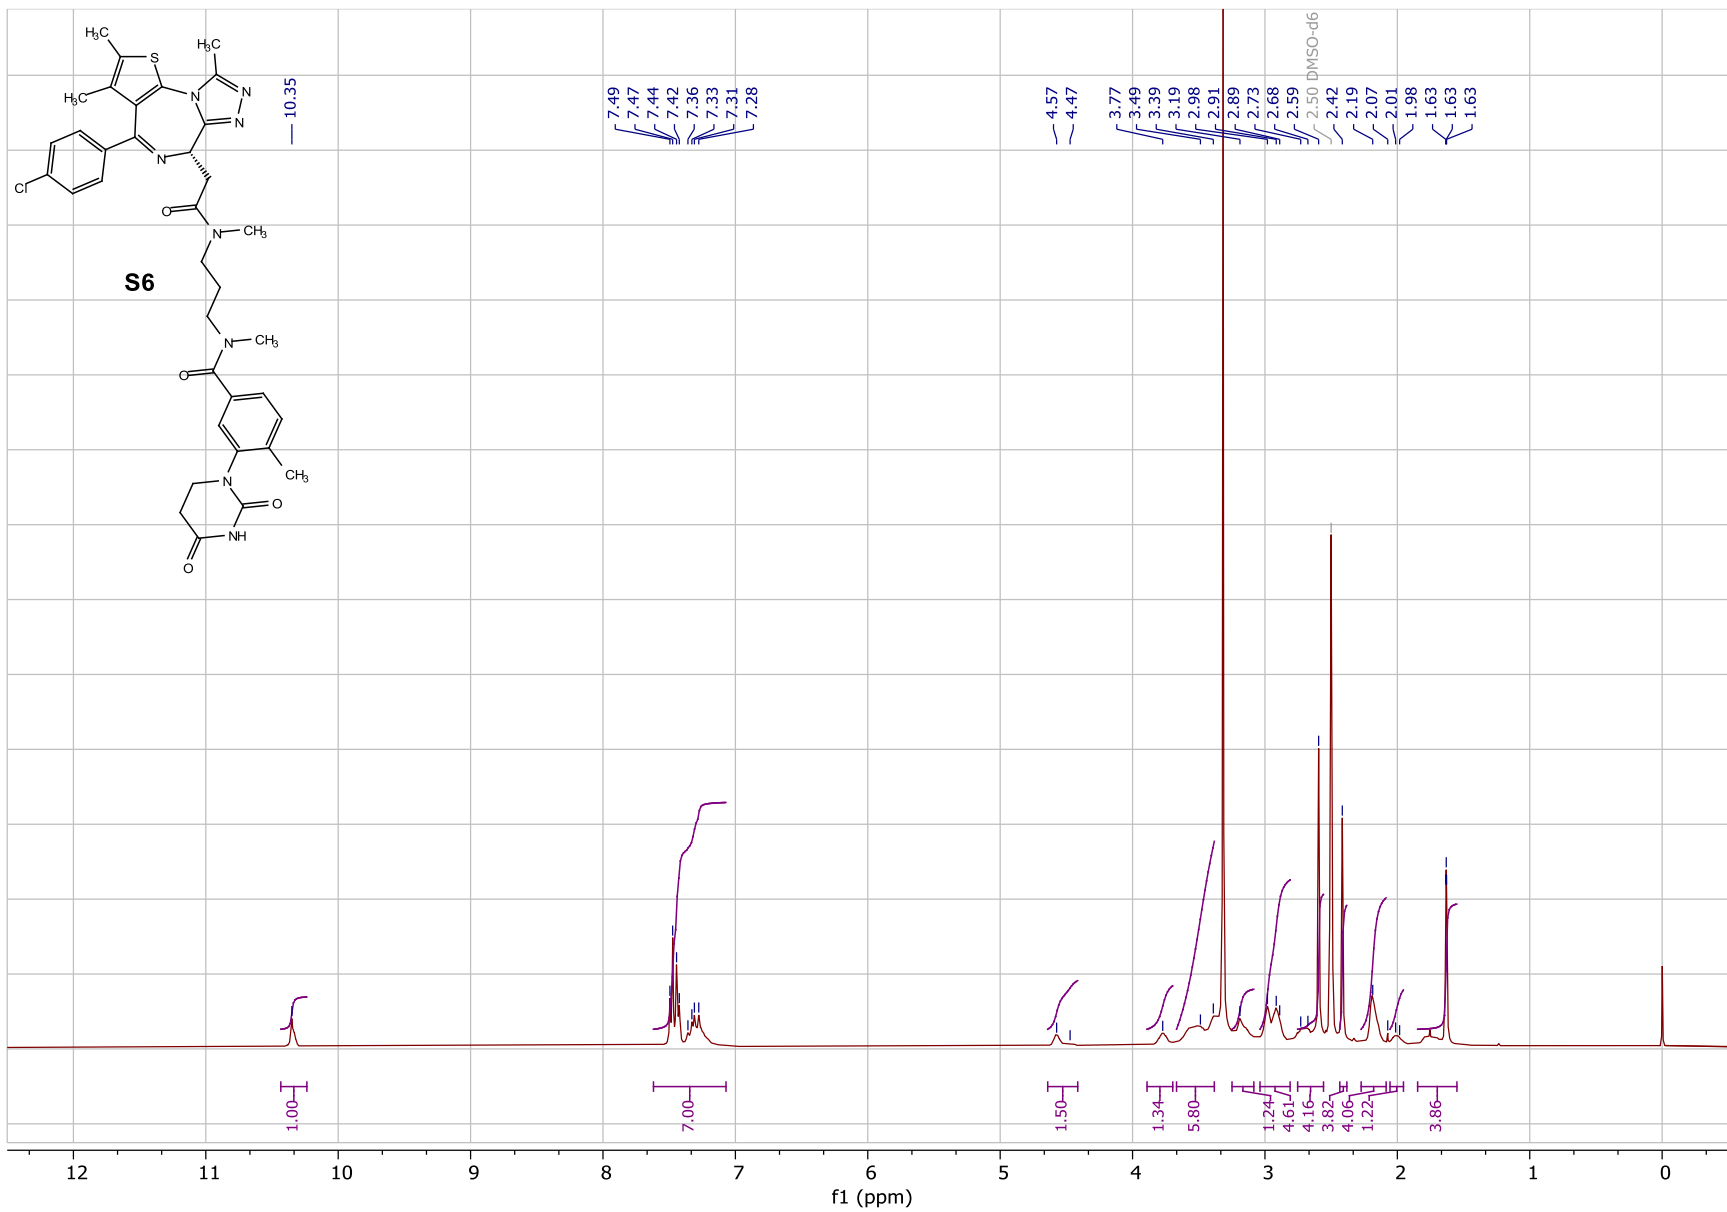

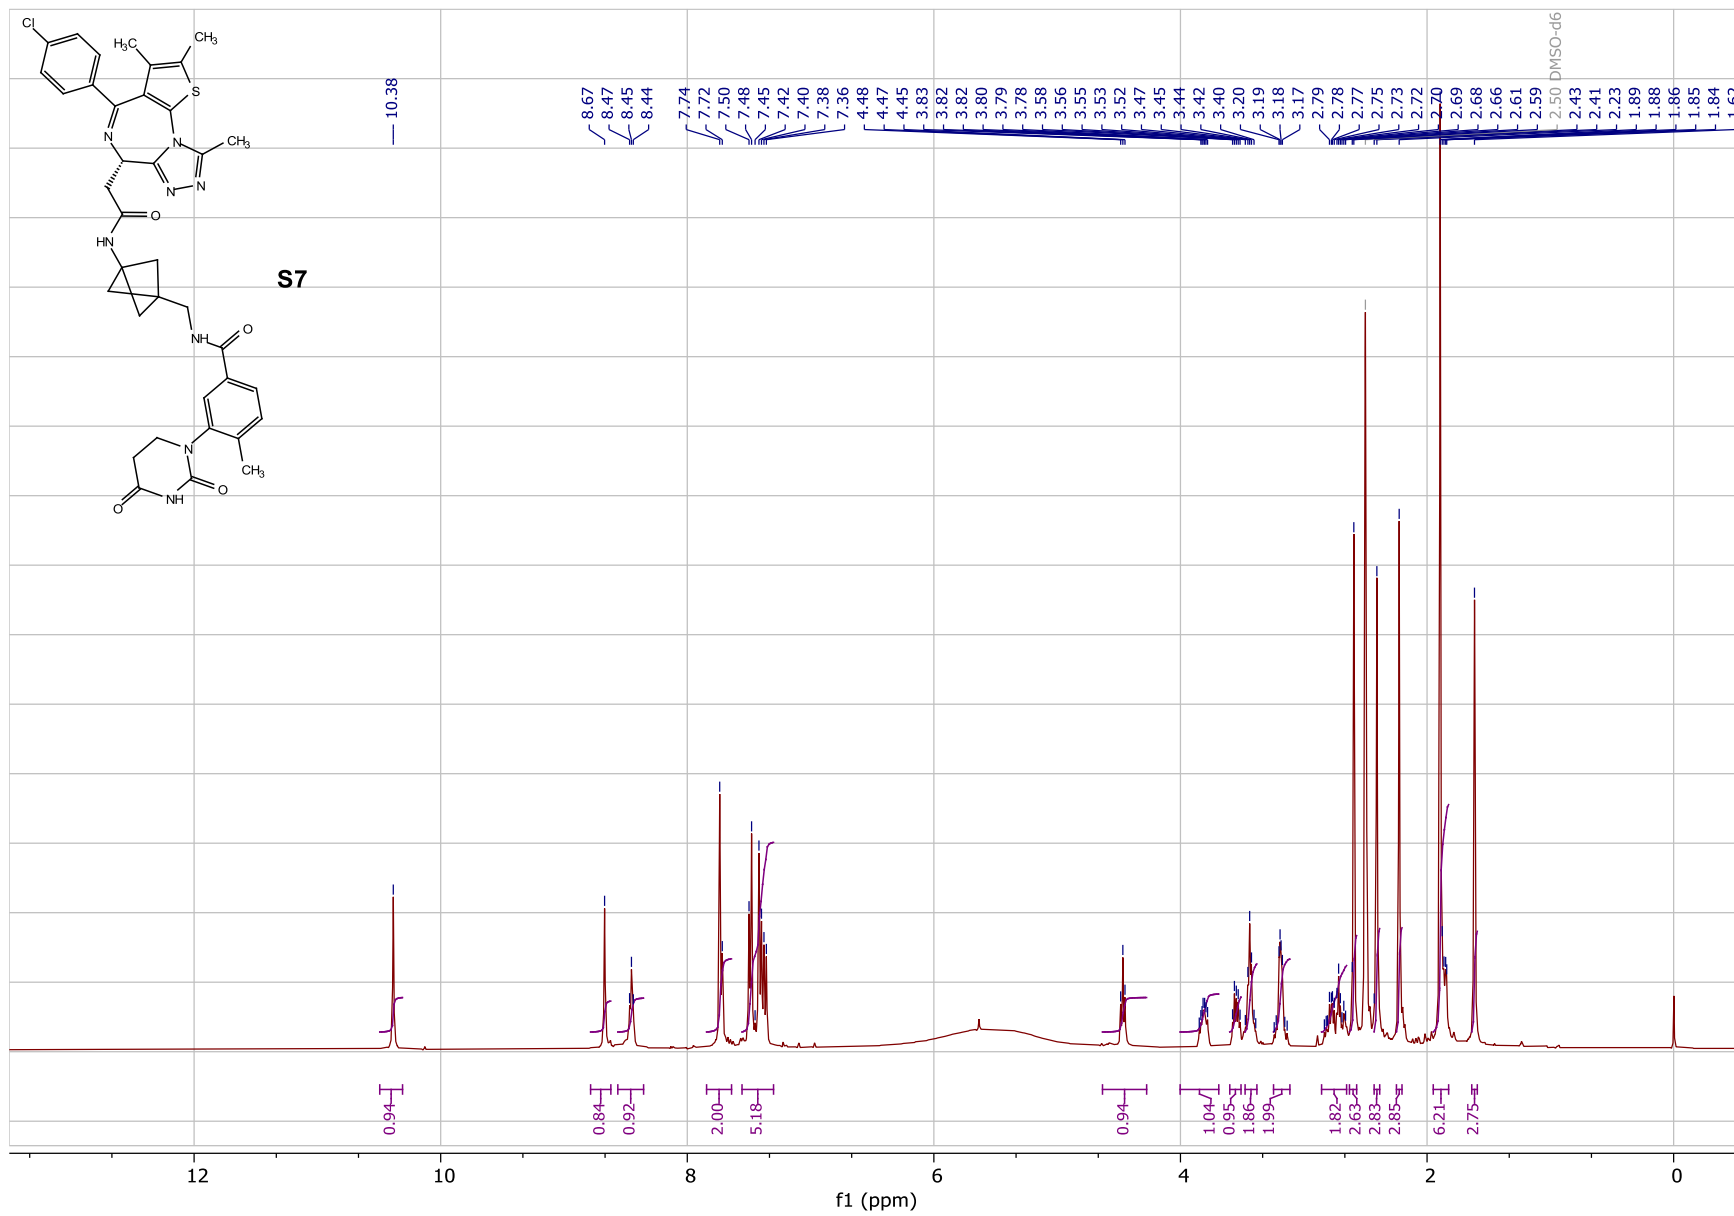

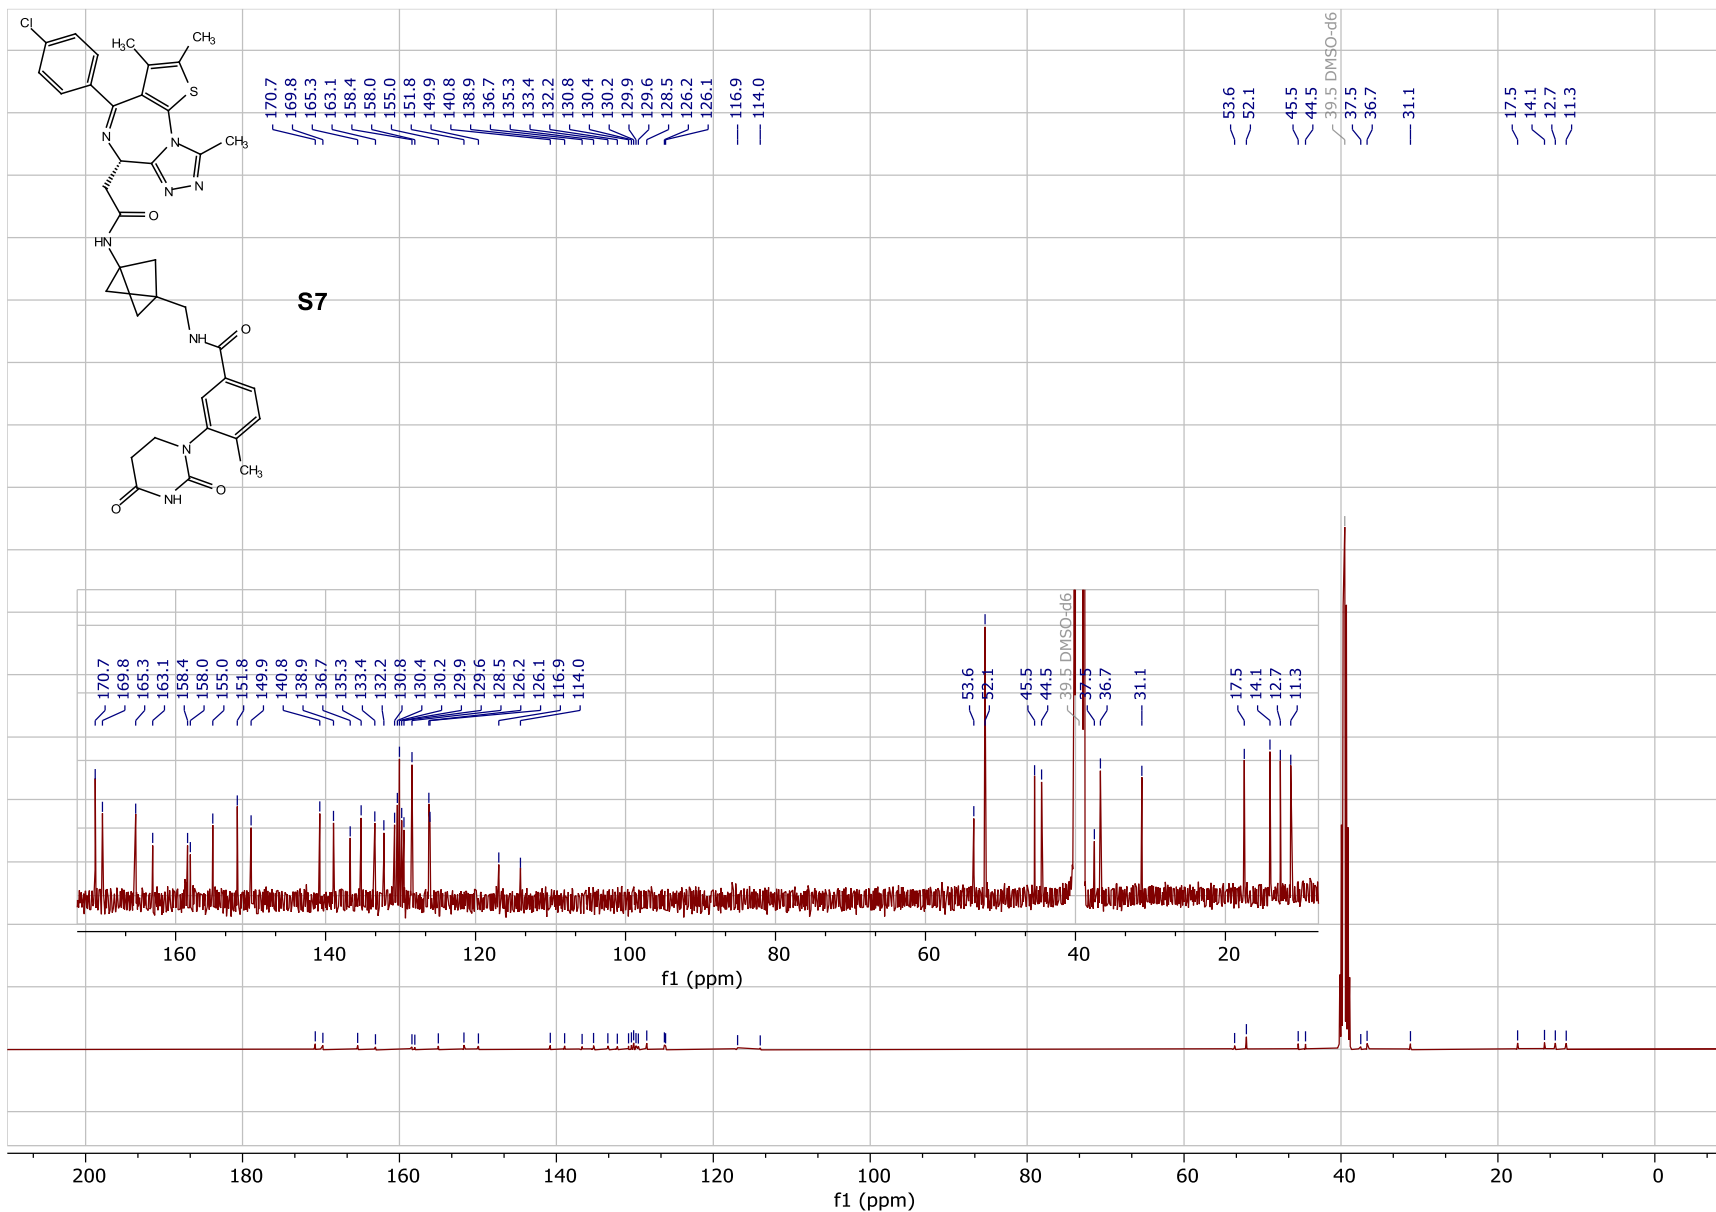



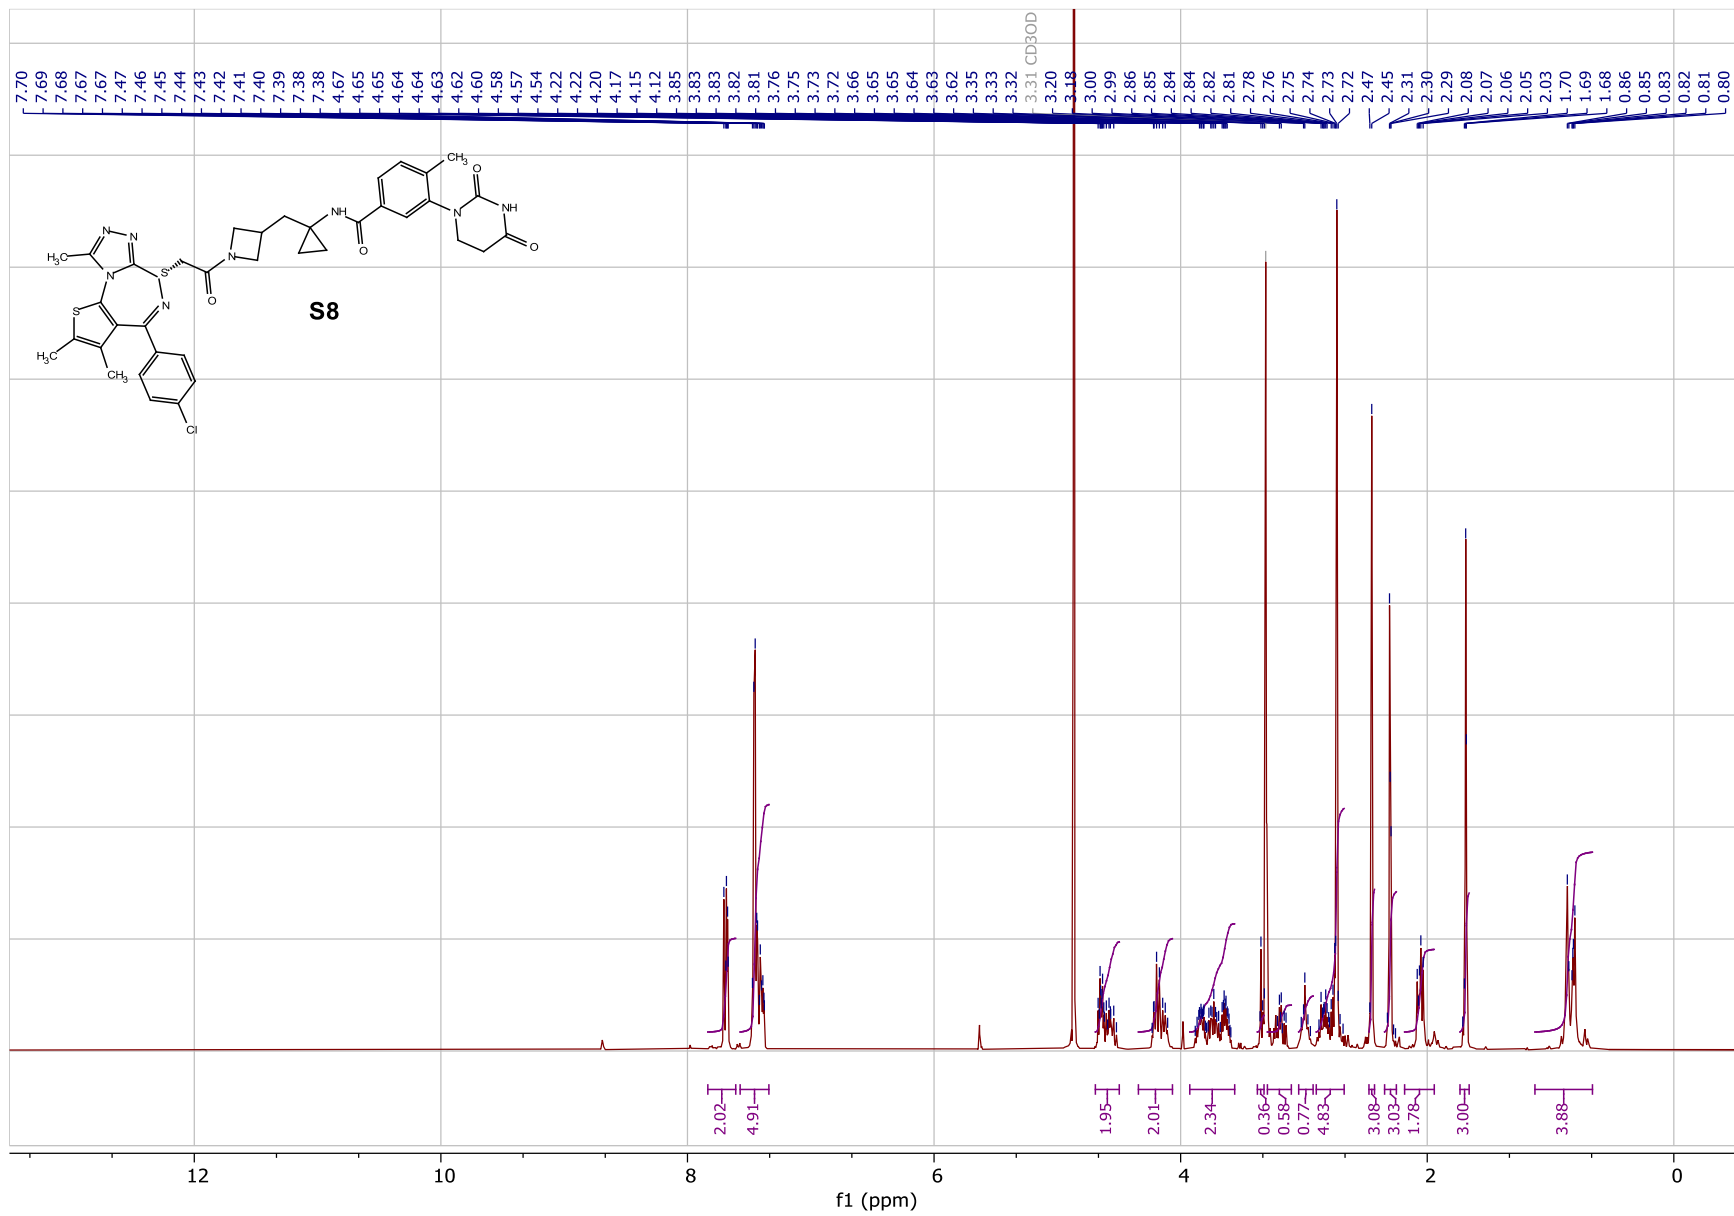

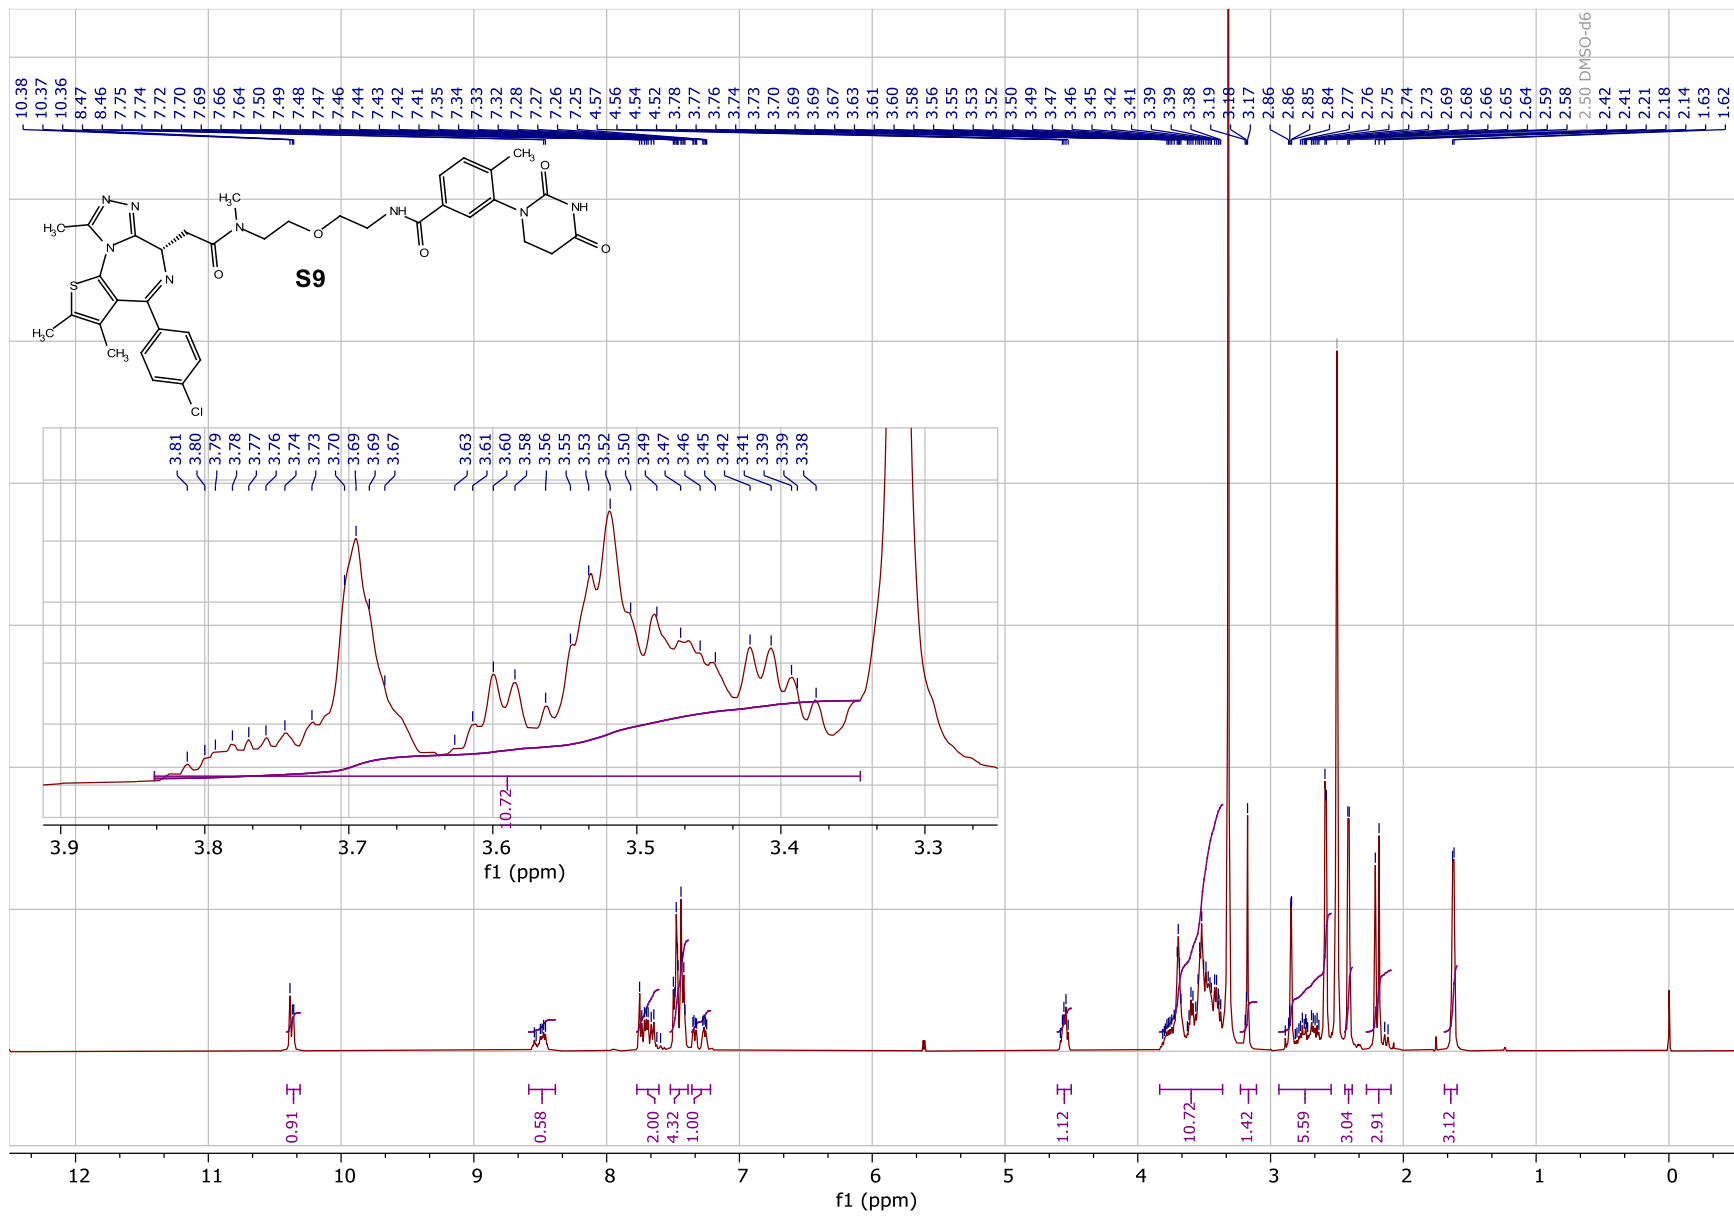

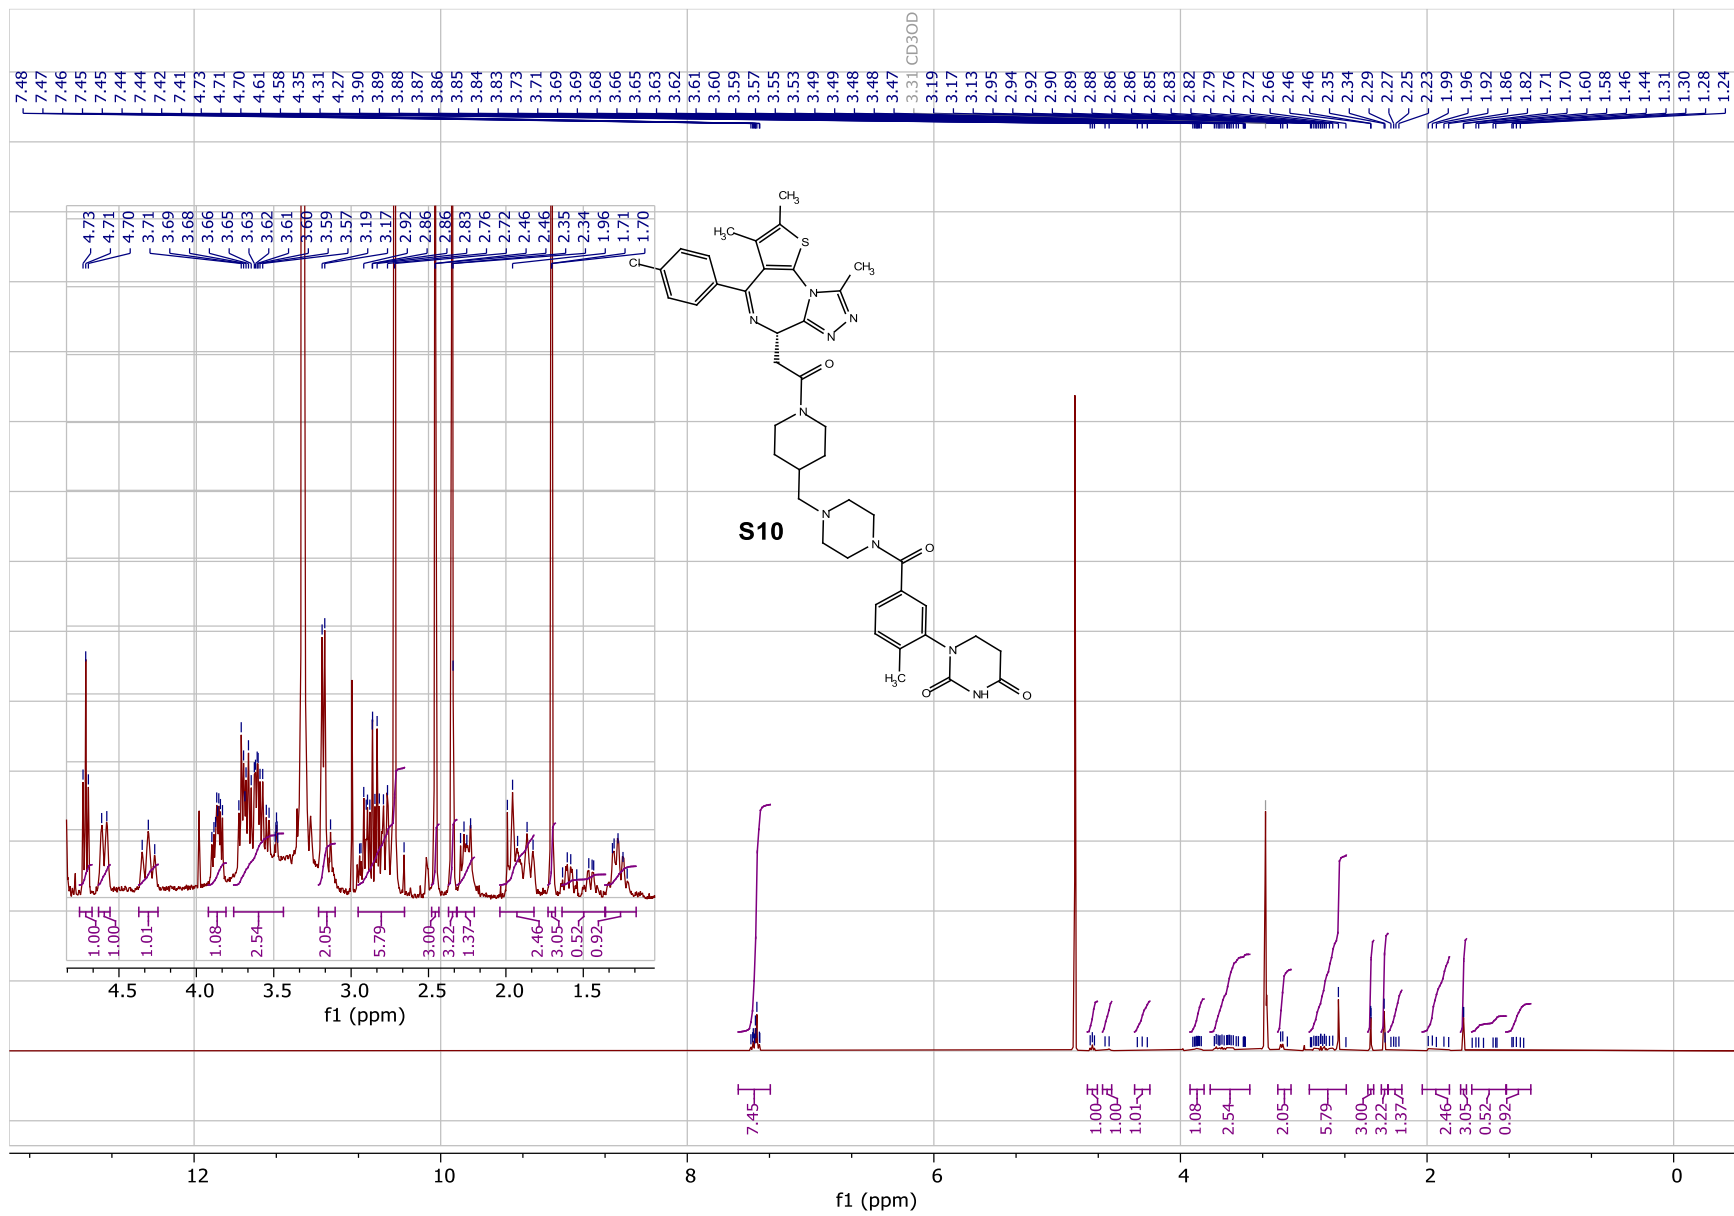

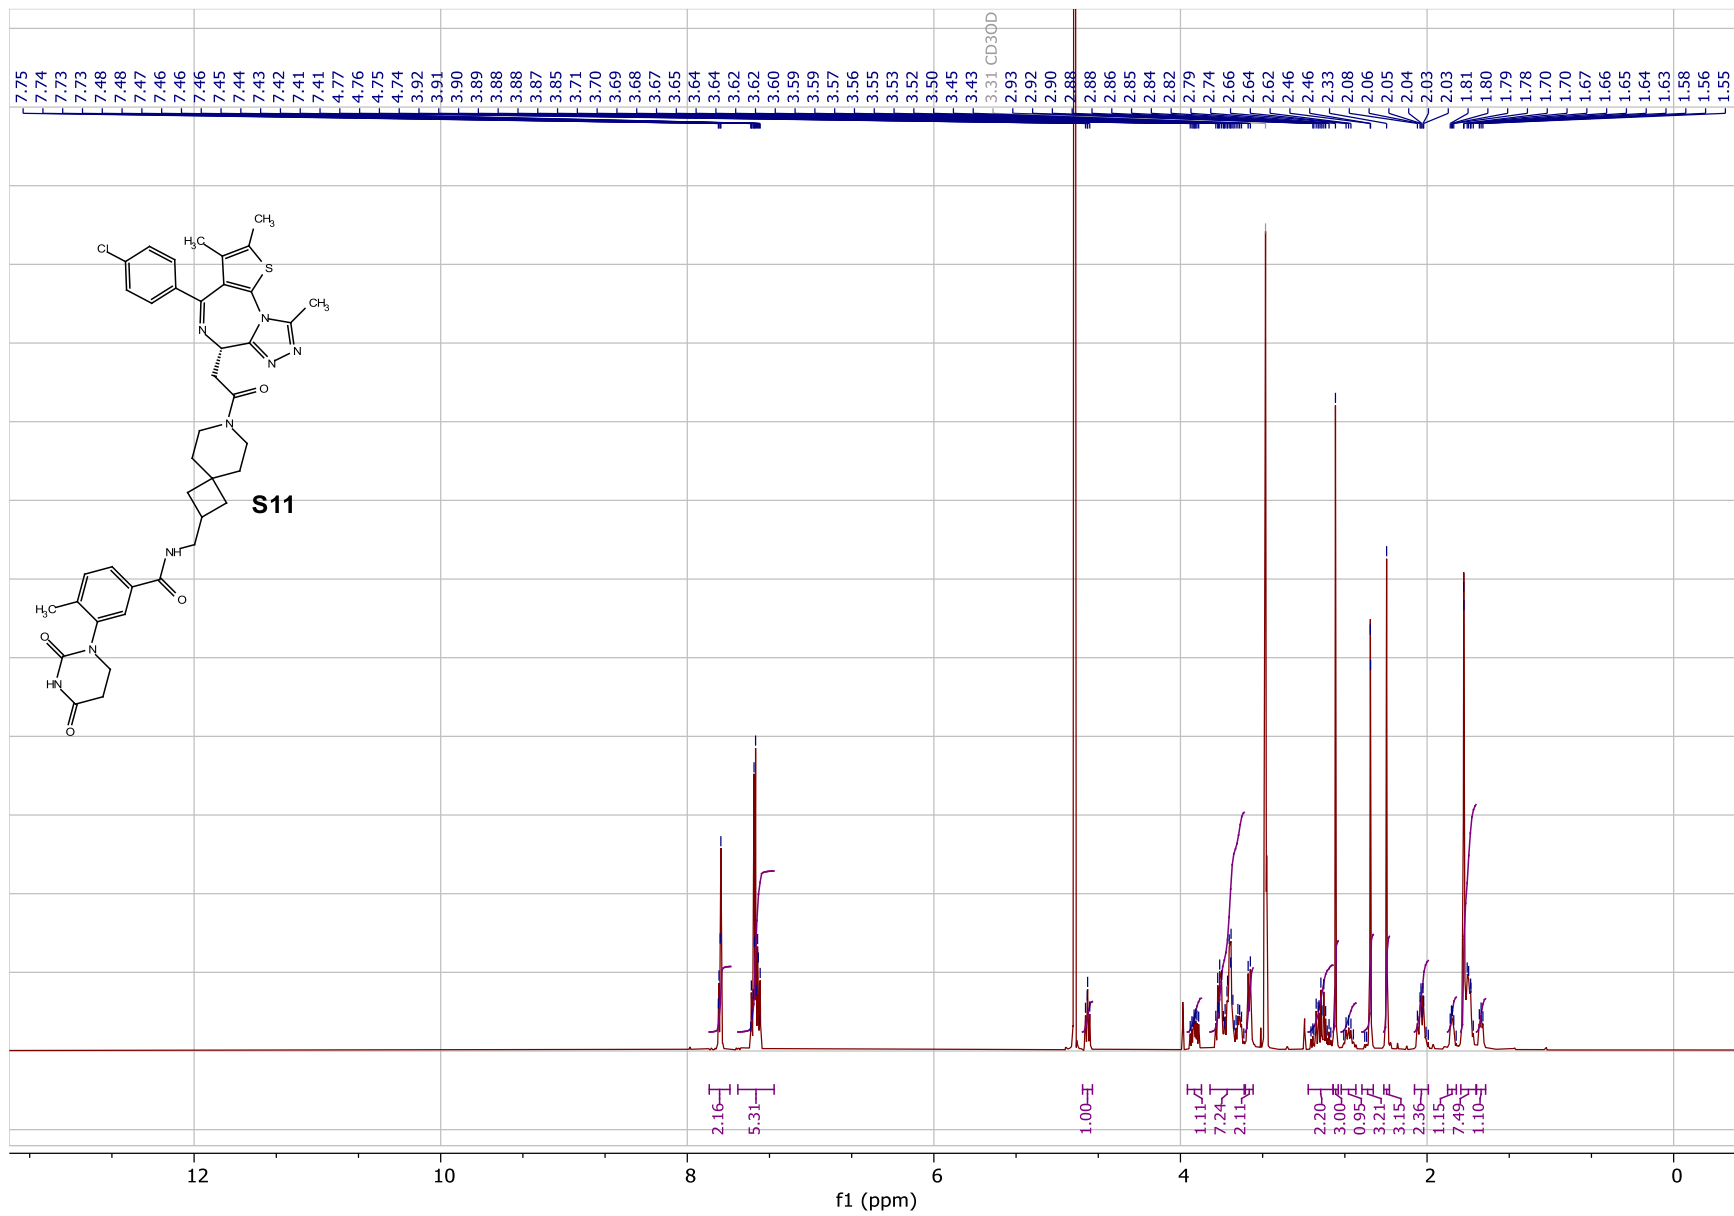

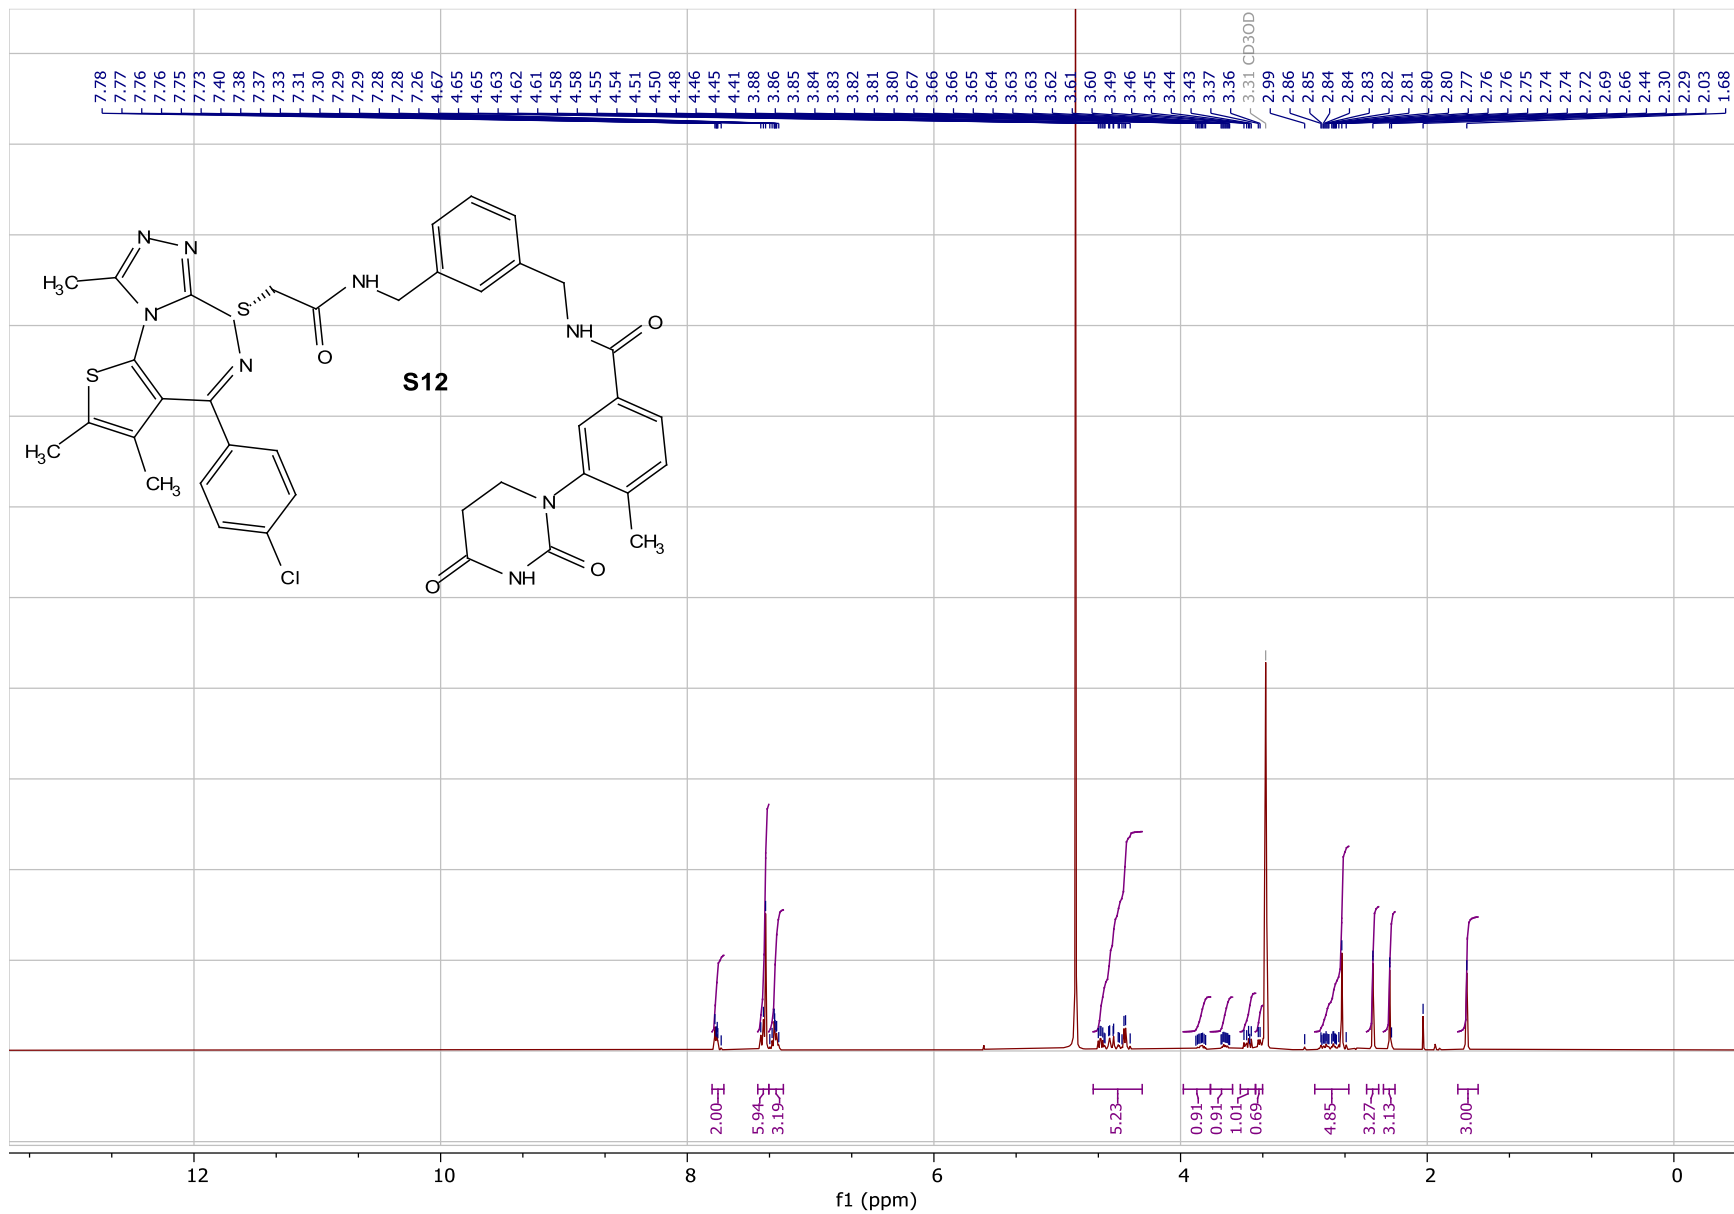

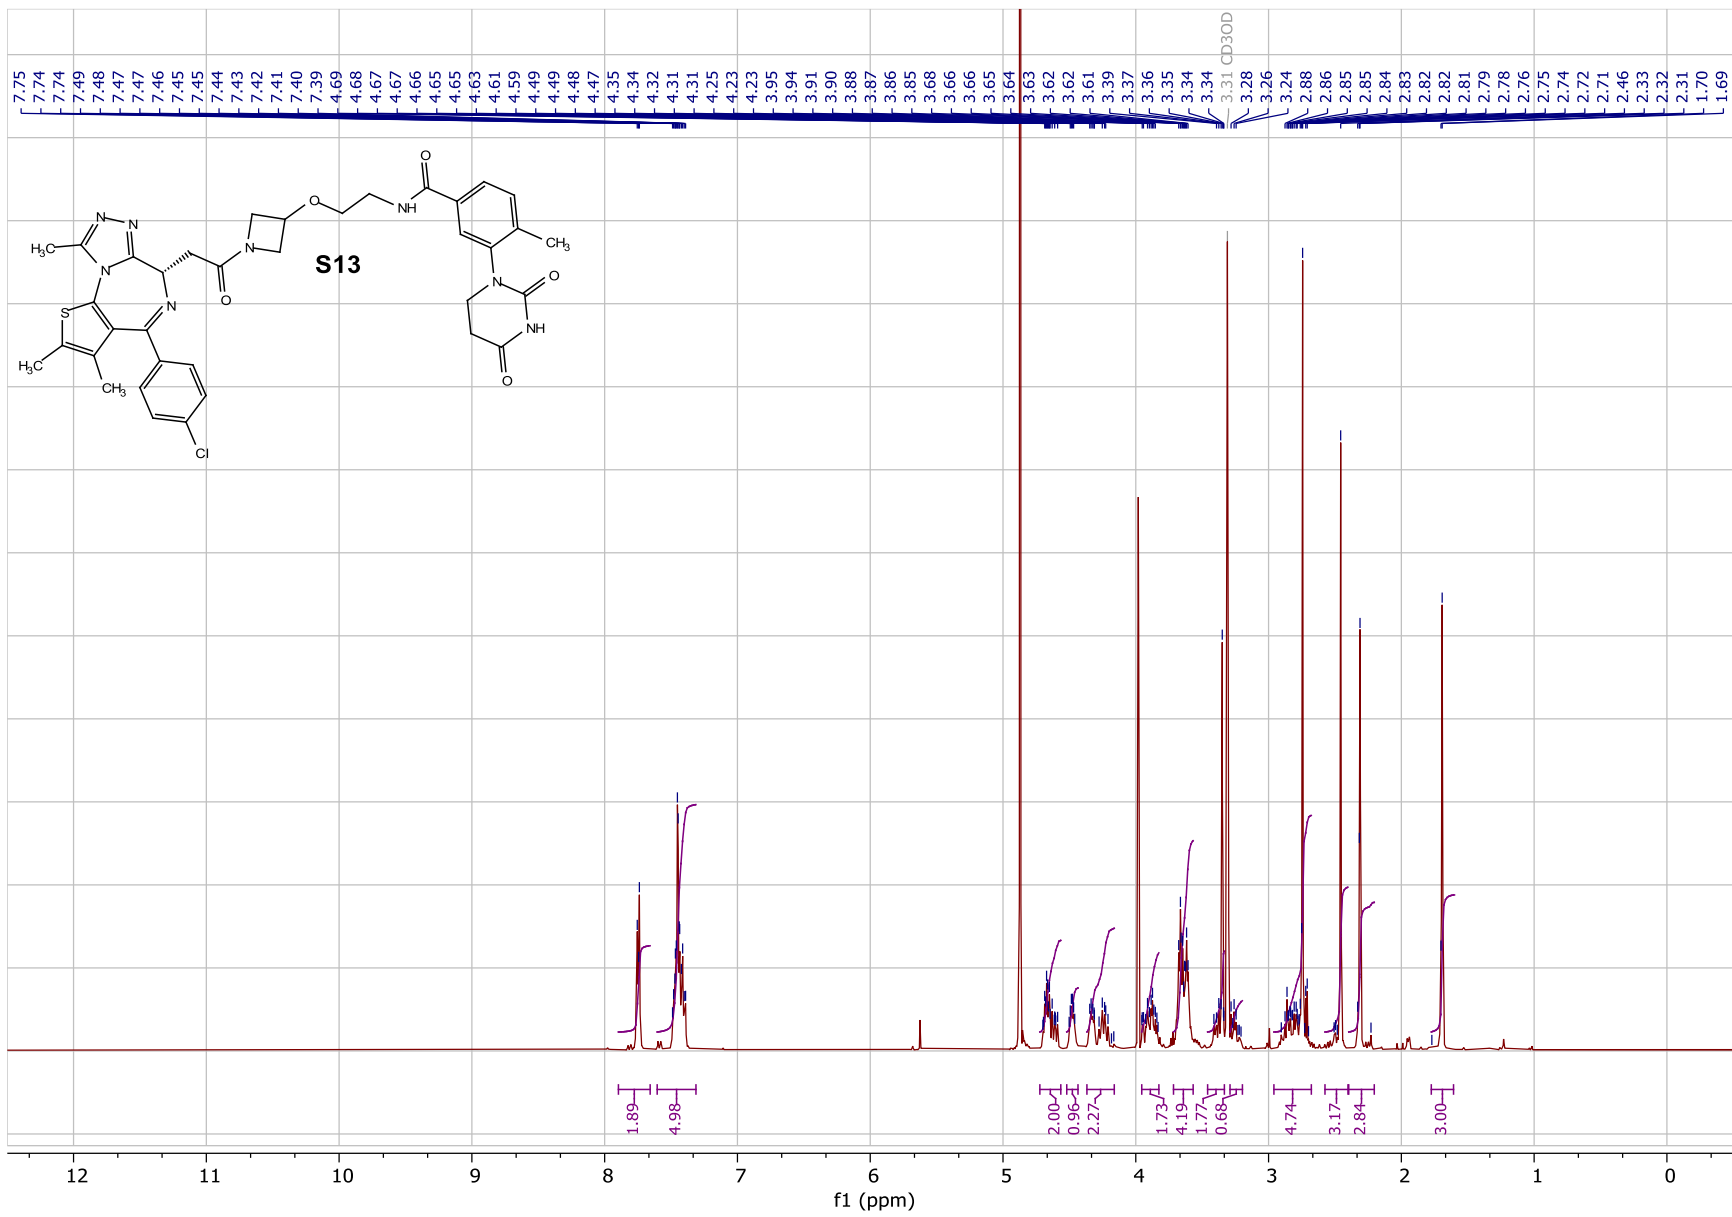

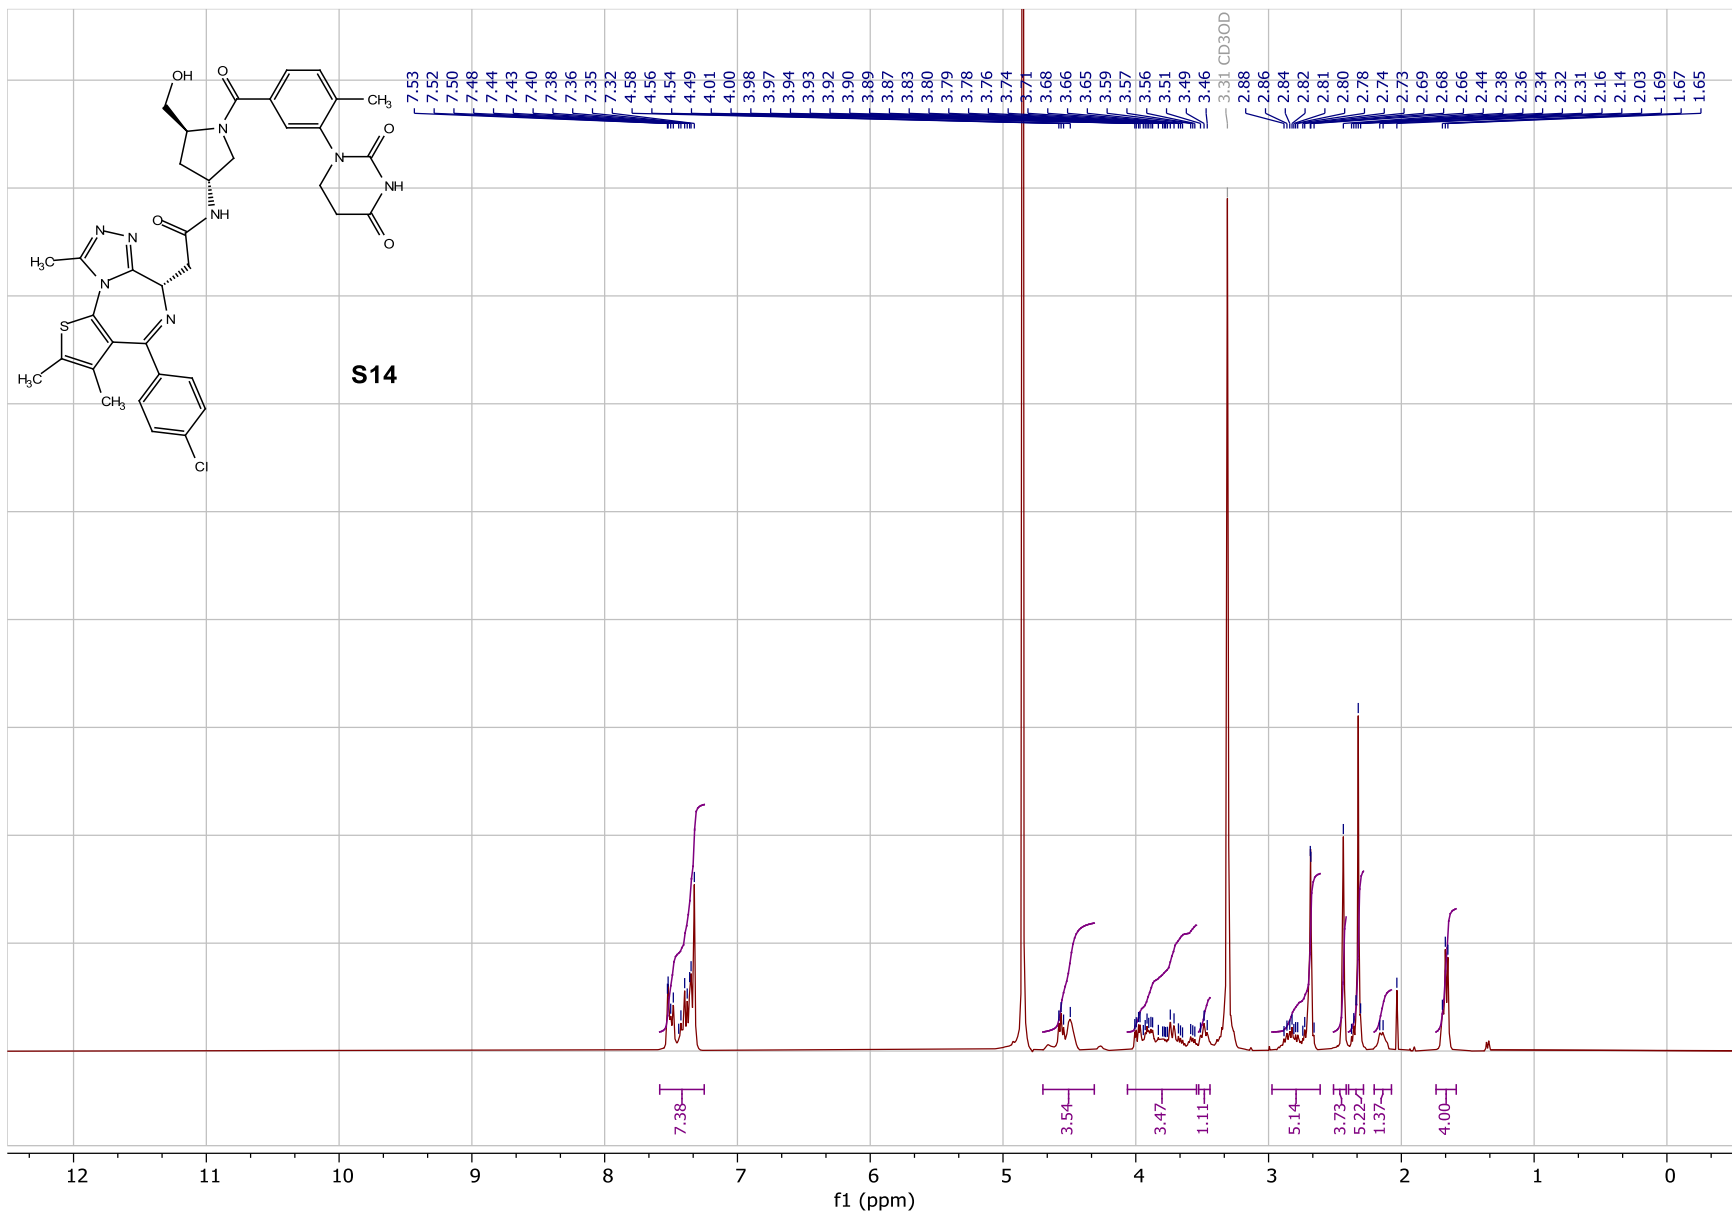

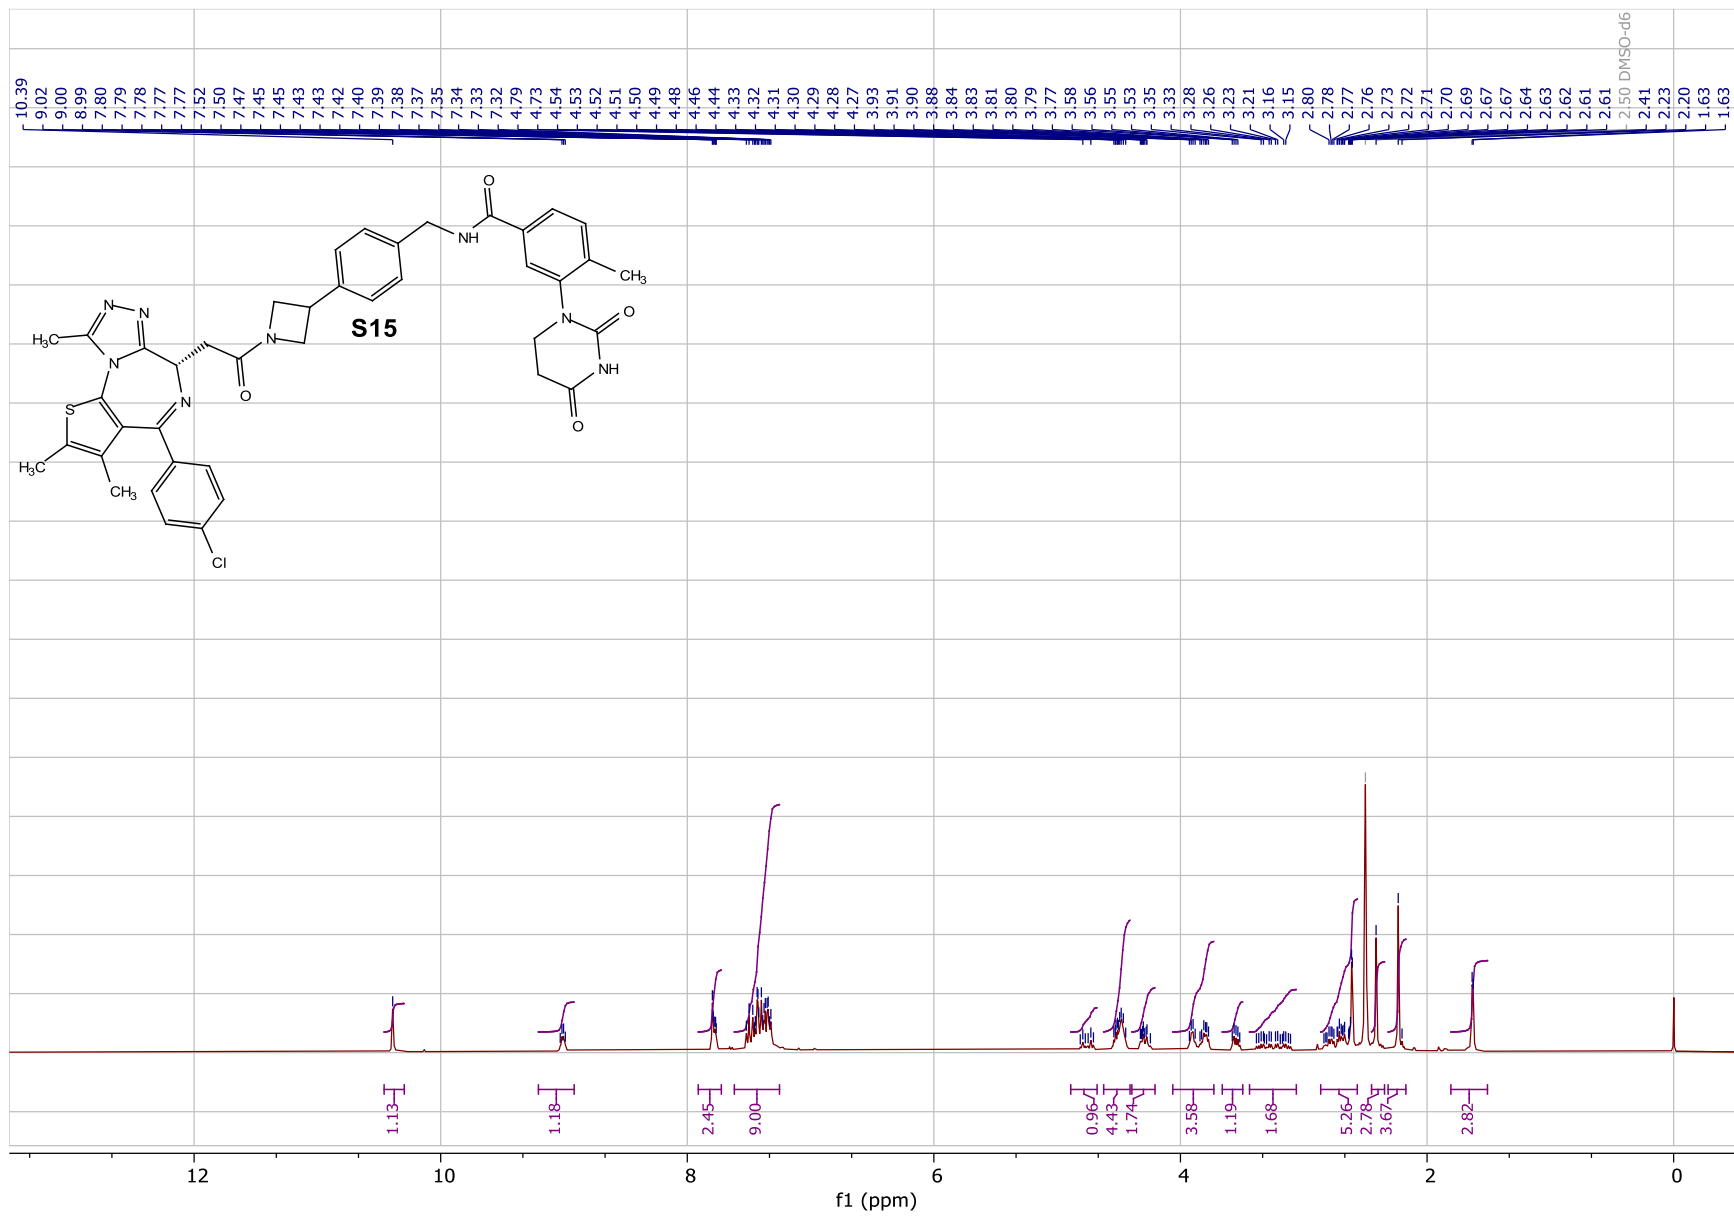



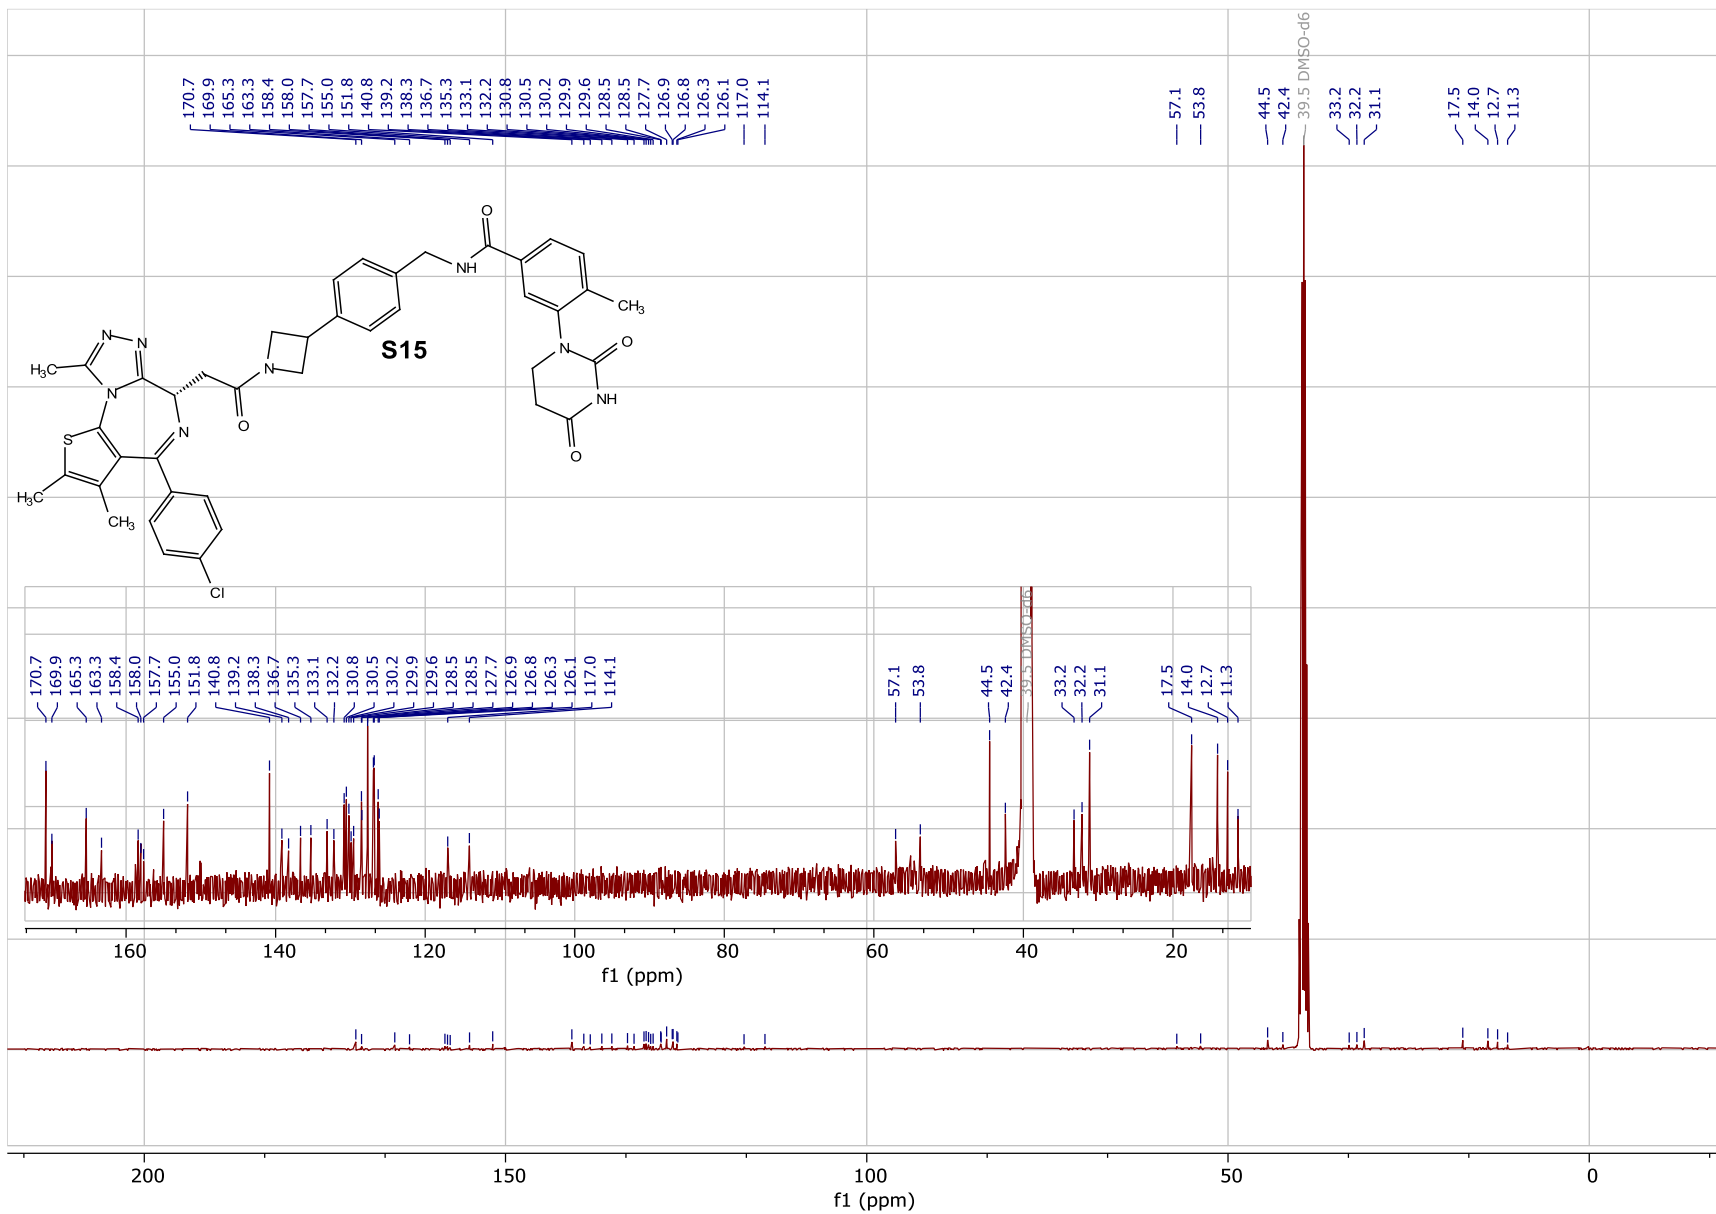

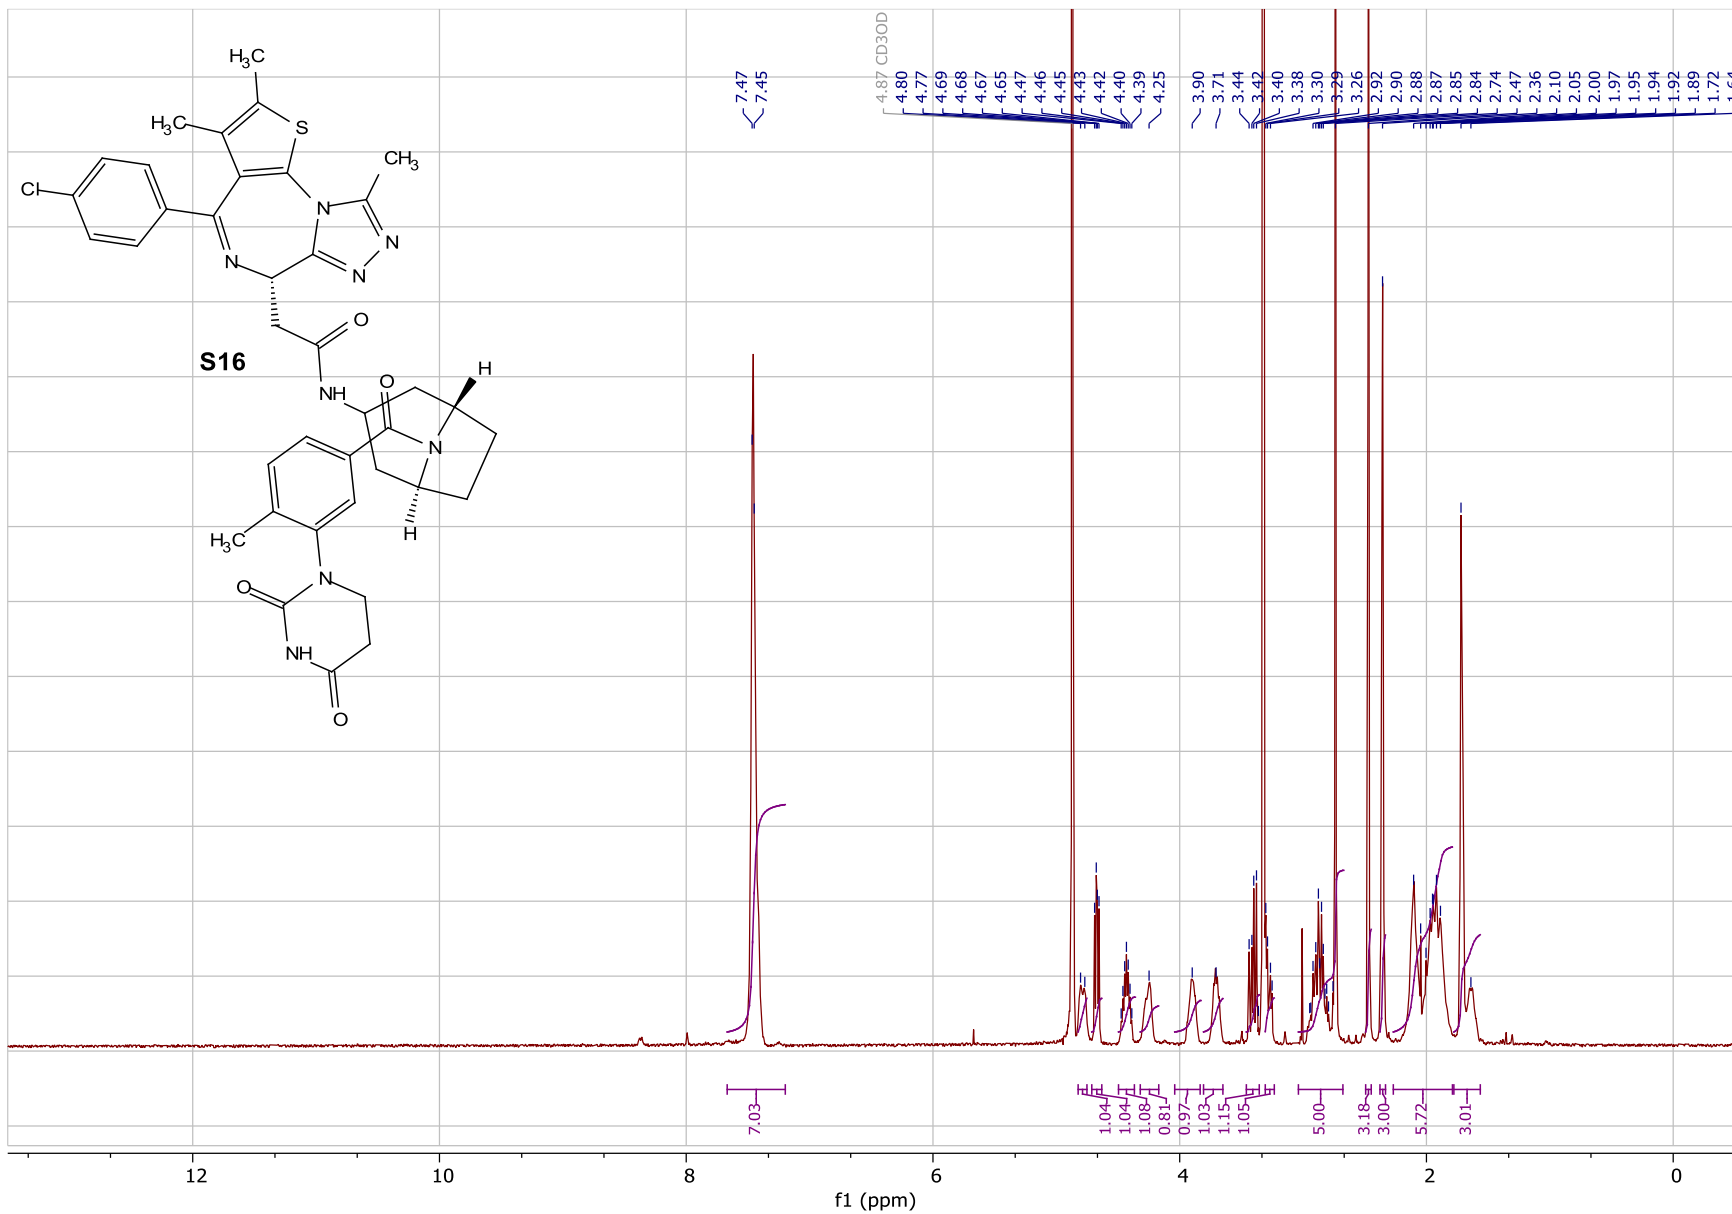



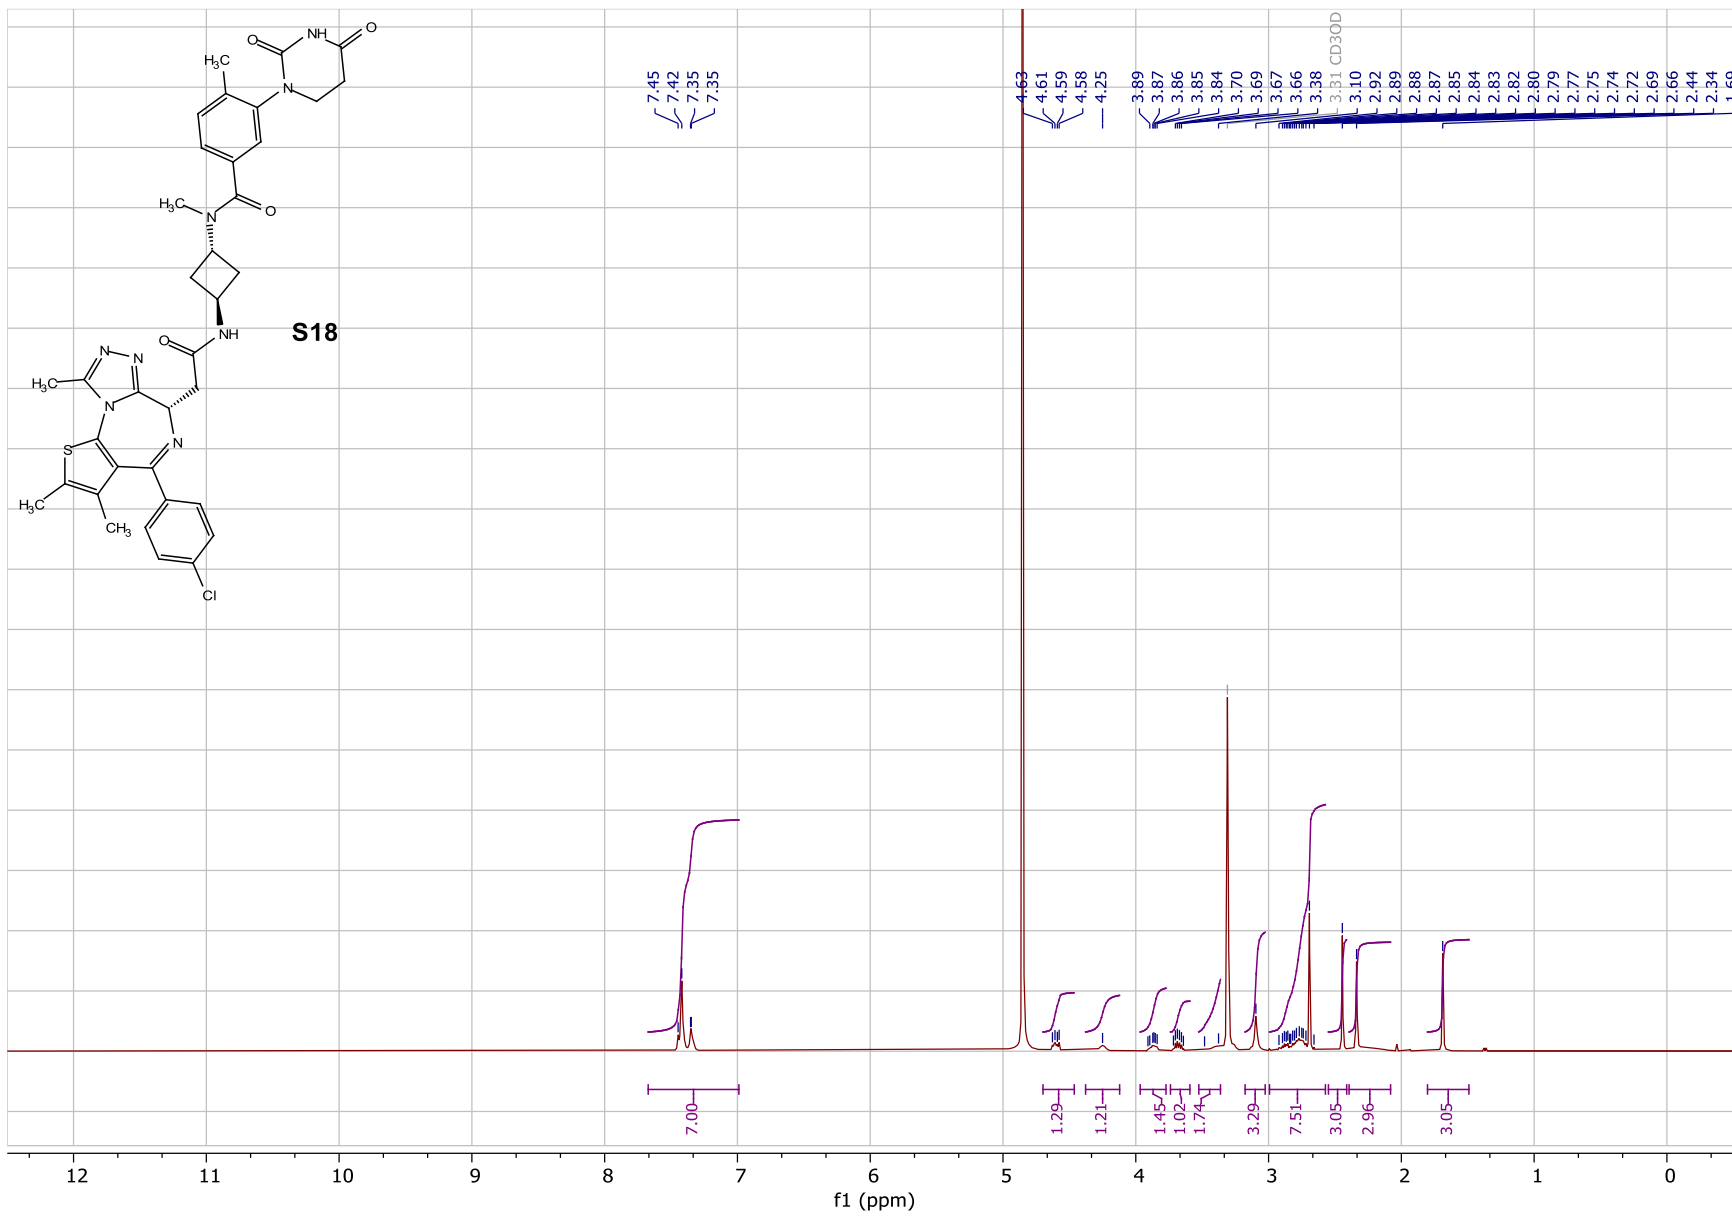

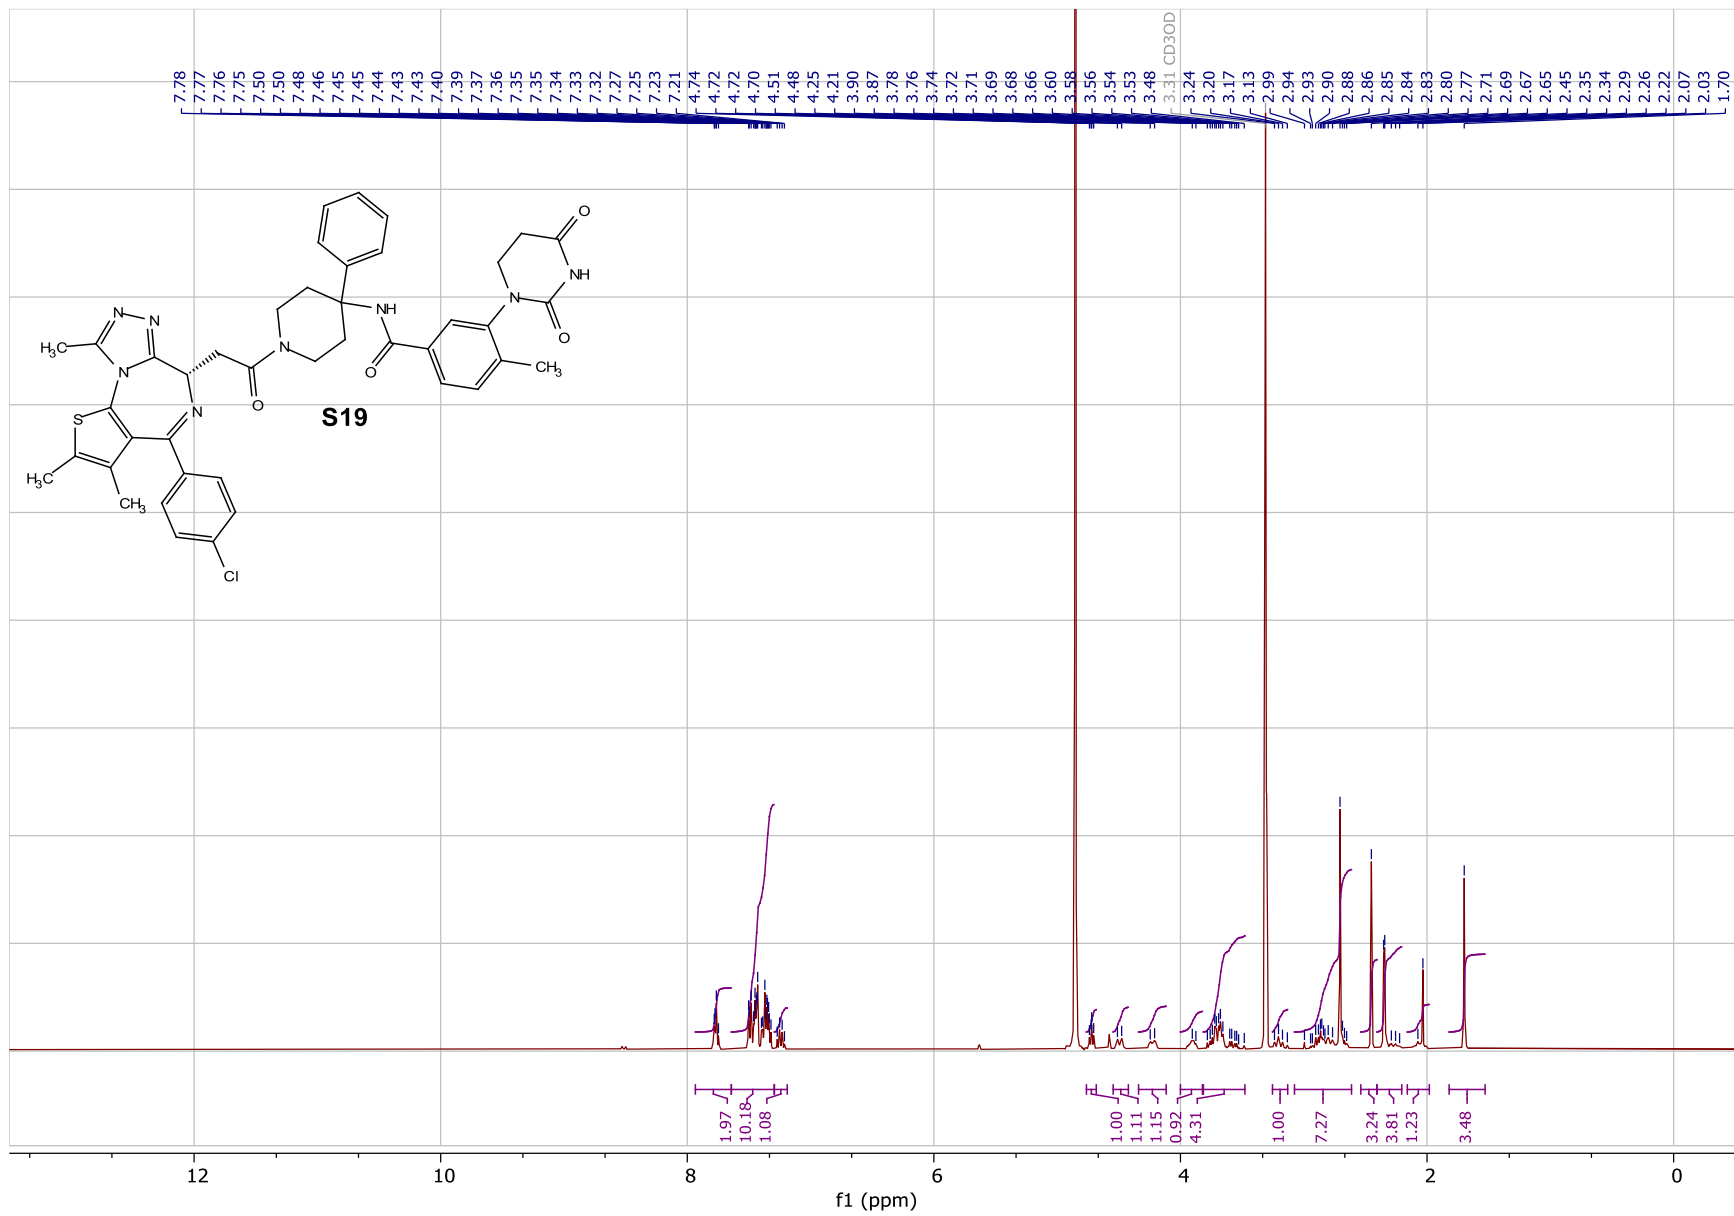

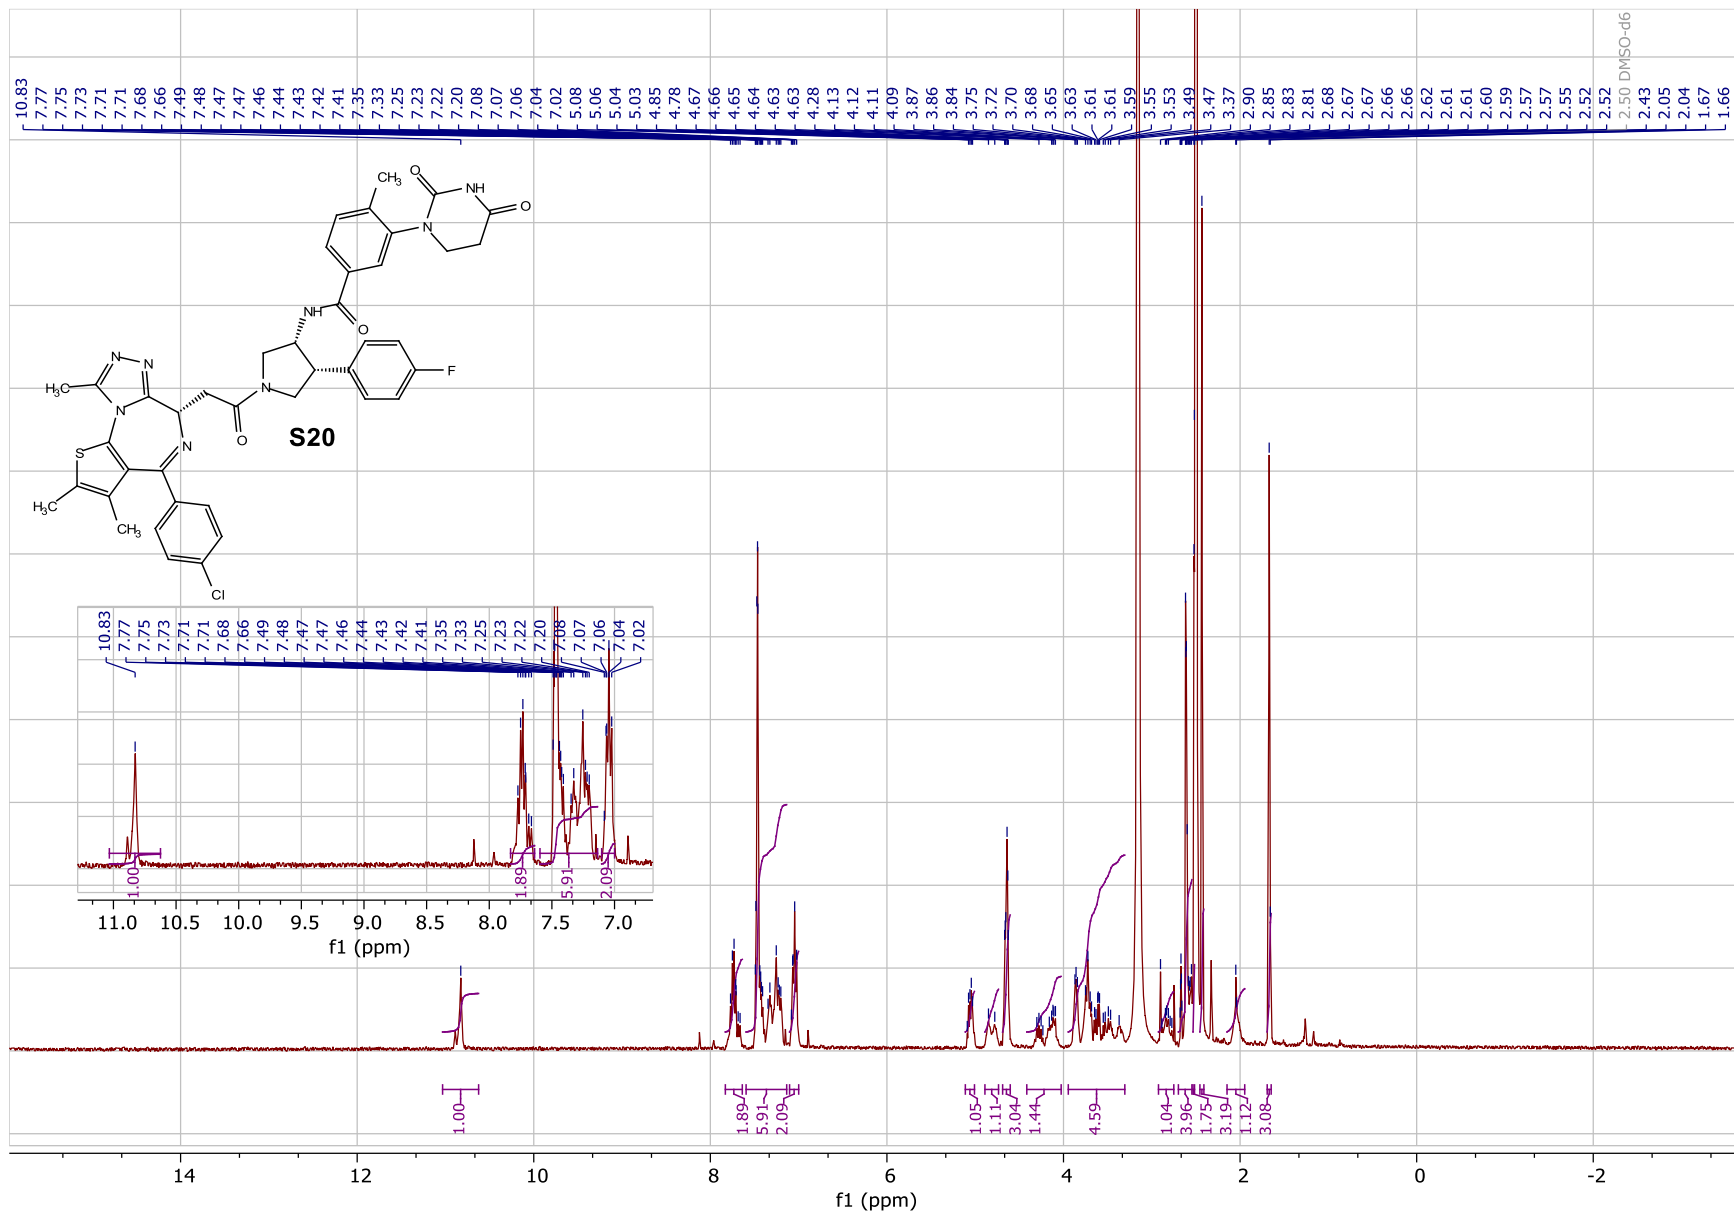

## VIII. References

1. Sharma, A.; Chandarlapaty, S.; Wang, L.; Lin, S.; Toy, W.; Katzenellenbogen, J. Preparation of antiestrogen compounds for treating breast cancer. WO2019241231, 2019.
2. Arista, L. H., Christina; Hollingworth, Gregory John; Holzer, Philipp; Imbach-Weese, Patricia; Lorber, Julien; Machauer, Rainer; Schmiedeberg, Niko; Vulpetti, Anna; Zoller, Thomas Preparation of N-[3-(7H-pyrrolo[2,3-d]pyrimidin-4-yl)phenyl]benzamide derivatives as BTK inhibitors. WO2019186343, 2019-10-03, 2019.
3. Nowak, R. P.; DeAngelo, S. L.; Buckley, D.; He, Z.; Donovan, K. A.; An, J.; Safaei, N.; Jedrychowski, M. P.; Ponthier, C. M.; Ishoey, M.; Zhang, T.; Mancias, J. D.; Gray, N. S.; Bradner, J. E.; Fischer, E. S. Plasticity in binding confers selectivity in ligand-induced protein degradation. **2018**, *14*, 706-714.
4. Matyskiela, M. E.; Lu, G.; Ito, T.; Pagarigan, B.; Lu, C. C.; Miller, K.; Fang, W.; Wang, N. Y.; Nguyen, D.; Houston, J.; Carmel, G.; Tran, T.; Riley, M.; Nosaka, L.; Lander, G. C.; Gaidarova, S.; Xu, S.; Ruchelman, A. L.; Handa, H.; Carmichael, J.; Daniel, T. O.; Cathers, B. E.; Lopez-Girona, A.; Chamberlain, P. P. A novel cereblon modulator recruits GSPT1 to the CRL4(CRBN) ubiquitin ligase. *Nature* **2016**, *535*, 252-7.

## IX. D2B Synthesis Data and Linker Tables

### CAD Quantification Tables

Table S6. O-Pom Plate 1 CAD Results

| Location | Mass Expected | Product Conc (mg/mL) | CAD Yield | Rt (min) | Purity % |
|----------|---------------|----------------------|-----------|----------|----------|
| A01      | 930.3         | 0.000                | 0         |          |          |
| A02      | 810.2         | 0.000                | 0         |          |          |
| A03      | 905.3         | 0.082                | 18        | 0.840    | 85       |
| A04      | 902.3         | 0.061                | 14        | 0.814    | 72       |
| A05      | 893.3         | 0.097                | 22        | 0.819    | 84       |
| A06      | 888.3         | 0.039                | 9         | 0.796    | 49       |
| A07      | 888.3         | 0.055                | 13        | 0.788    | 61       |
| A08      | 887.3         | 0.000                | 0         |          |          |
| A09      | 879.3         | 0.103                | 24        | 0.828    | 89       |
| A10      | 878.3         | 0.088                | 21        | 0.963    | 57       |
| A11      | 877.2         | 0.042                | 10        | 0.871    | 49       |
| A12      | 876.2         | 0.136                | 32        | 0.947    | 92       |
| B01      | 872.3         | 0.045                | 11        | 0.970    | 28       |
| B02      | 812.2         | 0.087                | 22        | 0.843    | 86       |
| B03      | 858.2         | 0.071                | 17        | 0.890    | 47       |
| B04      | 858.2         | 0.000                | 0         |          |          |
| B05      | 858.2         | 0.000                | 0         |          |          |
| B06      | 858.2         | 0.143                | 34        | 0.915    | 95       |
| B07      | 854.3         | 0.141                | 34        | 0.847    | 83       |
| B08      | 852.2         | 0.000                | 0         | 0.835    | 12       |
| B09      | 852.2         | 0.113                | 27        | 0.849    | 84       |
| B10      | 851.2         | 0.000                | 0         | 0.830    | 18       |
| B11      | 848.2         | 0.000                | 0         |          |          |
| B12      | 848.2         | 0.000                | 0         |          |          |
| C01      | 846.2         | 0.098                | 24        | 0.877    | 79       |
| C02      | 846.2         | 0.072                | 17        | 0.830    | 82       |
| C03      | 846.2         | 0.000                | 0         |          |          |
| C04      | 845.2         | 0.142                | 35        | 0.835    | 91       |
| C05      | 840.2         | 0.084                | 20        | 0.816    | 59       |
| C06      | 839.3         | 0.138                | 34        | 0.775    | 92       |
| C07      | 837.2         | 0.046                | 11        | 0.785    | 51       |
| C08      | 836.3         | 0.191                | 47        | 0.911    | 54       |
| C09      | 836.3         | 0.109                | 27        | 0.892    | 11       |
| C10      | 836.3         | 0.182                | 45        | 0.855    | 85       |
| C11      | 832.2         | 0.091                | 22        | 0.886    | 78       |
| C12      | 832.2         | 0.071                | 18        | 0.945    | 53       |
| D01      | 810.2         | 0.101                | 26        | 0.836    | 69       |
| D02      | 832.2         | 0.061                | 15        | 0.917    | 70       |
| D03      | 832.2         | 0.148                | 36        | 0.865    | 94       |
| D04      | 832.2         | 0.119                | 29        | 0.905    | 89       |



|     |       |       |    |       |    |
|-----|-------|-------|----|-------|----|
| D05 | 826.2 | 0.147 | 36 | 0.795 | 5  |
| D06 | 864.3 | 0.072 | 17 | 0.912 | 53 |
| D07 | 840.3 | 0.067 | 16 | 0.922 | 70 |
| D08 | 824.3 | 0.033 | 8  | 0.895 | 37 |
| D09 | 824.2 | 0.064 | 16 | 0.824 | 46 |
| D10 | 824.2 | 0.000 | 0  |       |    |
| D11 | 822.2 | 0.147 | 37 | 0.861 | 91 |
| D12 | 822.2 | 0.142 | 35 | 0.858 | 89 |
| E01 | 822.2 | 0.000 | 0  |       |    |
| E02 | 822.2 | 0.028 | 7  | 0.875 | 46 |
| E03 | 822.2 | 0.000 | 0  | 0.876 | 40 |
| E04 | 822.2 | 0.117 | 29 | 0.845 | 88 |
| E05 | 814.2 | 0.111 | 28 | 0.827 | 86 |
| E06 | 812.2 | 0.130 | 33 | 0.835 | 81 |
| E07 | 812.2 | 0.076 | 19 | 0.812 | 53 |
| E08 | 812.2 | 0.114 | 29 | 0.784 | 78 |
| E09 | 811.2 | 0.074 | 19 | 0.794 | 82 |
| E10 | 810.2 | 0.155 | 39 | 0.878 | 97 |
| E11 | 810.2 | 0.095 | 24 | 0.859 | 84 |
| E12 | 810.2 | 0.063 | 16 | 0.887 | 4  |
| F01 | 810.2 | 0.102 | 26 | 0.861 | 76 |
| F02 | 810.2 | 0.056 | 14 | 0.888 | 66 |
| F03 | 810.2 | 0.097 | 25 | 0.855 | 76 |
| F04 | 808.2 | 0.207 | 53 | 0.855 | 28 |
| F05 | 808.2 | 0.192 | 49 | 0.865 | 94 |
| F06 | 808.2 | 0.118 | 30 | 0.878 | 77 |
| F07 | 808.2 | 0.104 | 26 | 0.861 | 76 |
| F08 | 800.2 | 0.141 | 36 | 0.851 | 33 |
| F09 | 798.2 | 0.137 | 35 | 0.849 | 87 |
| F10 | 798.2 | 0.101 | 26 | 0.817 | 83 |
| F11 | 798.2 | 0.074 | 19 | 0.878 | 65 |
| F12 | 798.2 | 0.071 | 18 | 0.861 | 47 |
| G01 | 796.2 | 0.000 | 0  | 0.865 | 28 |
| G02 | 796.2 | 0.107 | 28 | 0.873 | 86 |
| G03 | 796.2 | 0.038 | 10 | 0.861 | 59 |
| G04 | 796.2 | 0.053 | 14 | 0.821 | 65 |
| G05 | 796.2 | 0.129 | 33 | 0.835 | 87 |
| G06 | 796.2 | 0.144 | 37 | 0.834 | 95 |
| G07 | 794.2 | 0.115 | 30 | 0.836 | 87 |
| G08 | 784.2 | 0.147 | 38 | 0.818 | 89 |
| G09 | 782.2 | 0.070 | 18 | 0.843 | 48 |
| G10 | 780.2 | 0.060 | 16 | 0.841 | 59 |
| G11 | 770.2 | 0.063 | 17 | 0.839 | 63 |
| G12 | 850.3 | 0.000 | 0  | 0.910 | 8  |
| H01 | 865.3 | 0.134 | 32 | 0.770 | 87 |
| H02 | 879.3 | 0.036 | 8  | 0.771 | 31 |
| H03 | 959.3 | 0.082 | 17 | 0.905 | 37 |
| H04 | 919.3 | 0.044 | 10 | 0.871 | 39 |
| H05 | 784.2 | 0.000 | 0  |       |    |

|     |       |       |    |       |    |
|-----|-------|-------|----|-------|----|
| H06 | 800.2 | 0.000 | 0  | 0.816 | 11 |
| H07 | 844.2 | 0.096 | 23 | 0.819 | 66 |
| H08 | 497.1 | 0.125 | 52 | 0.935 | 76 |
| H09 | 429.1 | 0.000 | 0  |       |    |
| H10 | 400.1 | 0.125 | 64 | 0.820 | 95 |
| H11 | 332.1 | 0.086 | 53 | 0.462 | 77 |
| H12 | 115.0 | 0.000 | 0  | 1.035 | 5  |

Table S7. O-Pom Plate 2 CAD Results

| Location | Mass Expected | Product Conc (mg/mL) | CAD Yield (%) | Rt (min) | Purity % |
|----------|---------------|----------------------|---------------|----------|----------|
| A01      | 930.3         | 0.266                | 16            | 0.815    | 61       |
| A02      | 810.2         | 0.000                | 0             |          |          |
| A03      | 905.3         | 0.340                | 21            | 0.840    | 76       |
| A04      | 902.3         | 0.177                | 11            | 0.814    | 71       |
| A05      | 893.3         | 0.375                | 23            | 0.820    | 84       |
| A06      | 888.3         | 0.255                | 16            | 0.795    | 73       |
| A07      | 888.3         | 0.489                | 30            | 0.787    | 74       |
| A08      | 887.3         | 0.494                | 31            | 0.805    | 75       |
| A09      | 879.3         | 0.253                | 16            | 0.825    | 74       |
| A10      | 878.3         | 0.271                | 17            | 0.964    | 37       |
| A11      | 877.2         | 0.162                | 10            | 0.873    | 47       |
| A12      | 876.2         | 0.000                | 0             |          |          |
| B01      | 872.3         | 0.093                | 6             | 0.970    | 20       |
| B02      | 812.2         | 0.279                | 19            | 0.844    | 81       |
| B03      | 858.2         | 0.299                | 19            | 0.890    | 59       |
| B04      | 858.2         | 0.000                | 0             | 0.981    | 12       |
| B05      | 858.2         | 0.000                | 0             |          |          |
| B06      | 858.2         | 0.389                | 25            | 0.915    | 72       |
| B07      | 854.3         | 0.620                | 40            | 0.849    | 78       |
| B08      | 852.2         | 0.040                | 3             |          |          |
| B09      | 852.2         | 0.267                | 17            | 0.849    | 68       |
| B10      | 851.2         | 0.091                | 6             | 0.831    | 18       |
| B11      | 848.2         | 0.145                | 9             | 0.804    | 49       |
| B12      | 848.2         | 0.000                | 0             |          |          |
| C01      | 846.2         | 0.314                | 20            | 0.879    | 61       |
| C02      | 846.2         | 0.212                | 14            | 0.830    | 44       |
| C03      | 846.2         | 0.598                | 39            | 0.834    | 82       |
| C04      | 845.2         | 0.507                | 33            | 0.835    | 90       |
| C05      | 840.2         | 0.162                | 11            | 0.817    | 31       |
| C06      | 839.3         | 0.699                | 46            | 0.775    | 92       |
| C07      | 837.2         | 0.221                | 15            | 0.785    | 51       |
| C08      | 836.3         | 0.000                | 0             | 0.889    | 26       |
| C09      | 836.3         | 0.224                | 15            | 0.933    | 61       |
| C10      | 836.3         | 0.180                | 12            | 0.856    | 52       |
| C11      | 832.2         | 0.428                | 28            | 0.887    | 81       |
| C12      | 832.2         | 0.000                | 0             |          |          |

|     |       |       |    |       |    |
|-----|-------|-------|----|-------|----|
| D01 | 810.2 | 0.444 | 30 | 0.837 | 81 |
| D02 | 832.2 | 0.099 | 7  | 0.917 | 51 |
| D03 | 832.2 | 0.622 | 41 | 0.865 | 92 |
| D04 | 832.2 | 0.589 | 39 | 0.907 | 90 |
| D05 | 826.2 | 0.682 | 45 | 0.824 | 79 |
| D06 | 864.3 | 0.356 | 23 | 0.911 | 64 |
| D07 | 840.3 | 0.425 | 28 | 0.923 | 83 |
| D08 | 824.3 | 0.045 | 3  | 0.896 | 29 |
| D09 | 824.2 | 0.181 | 12 | 0.824 | 37 |
| D10 | 824.2 | 0.000 | 0  | 0.840 | 15 |
| D11 | 822.2 | 0.683 | 46 | 0.862 | 90 |
| D12 | 822.2 | 0.000 | 0  |       |    |
| E01 | 822.2 | 0.000 | 0  |       |    |
| E02 | 822.2 | 0.080 | 5  | 0.876 | 48 |
| E03 | 822.2 | 0.570 | 38 | 0.864 | 38 |
| E04 | 822.2 | 0.509 | 34 | 0.848 | 88 |
| E05 | 814.2 | 0.636 | 43 | 0.829 | 87 |
| E06 | 812.2 | 0.274 | 19 | 0.835 | 48 |
| E07 | 812.2 | 0.516 | 35 | 0.813 | 78 |
| E08 | 812.2 | 0.516 | 35 | 0.785 | 78 |
| E09 | 811.2 | 0.385 | 26 | 0.795 | 79 |
| E10 | 810.2 | 0.260 | 18 | 0.879 | 66 |
| E11 | 810.2 | 0.440 | 30 | 0.860 | 76 |
| E12 | 810.2 | 0.000 | 0  |       |    |
| F01 | 810.2 | 0.198 | 13 | 0.863 | 38 |
| F02 | 810.2 | 0.201 | 14 | 0.890 | 75 |
| F03 | 810.2 | 0.487 | 33 | 0.855 | 78 |
| F04 | 808.2 | 0.517 | 35 | 0.855 | 25 |
| F05 | 808.2 | 0.000 | 0  |       |    |
| F06 | 808.2 | 0.108 | 7  | 0.879 | 33 |
| F07 | 808.2 | 0.535 | 36 | 0.863 | 77 |
| F08 | 800.2 | 0.259 | 18 | 0.852 | 26 |
| F09 | 798.2 | 0.659 | 45 | 0.849 | 90 |
| F10 | 798.2 | 0.286 | 20 | 0.818 | 78 |
| F11 | 798.2 | 0.241 | 17 | 0.879 | 58 |
| F12 | 798.2 | 0.000 | 0  |       |    |
| G01 | 796.2 | 0.125 | 9  | 0.867 | 57 |
| G02 | 796.2 | 0.392 | 27 | 0.872 | 74 |
| G03 | 796.2 | 0.203 | 14 | 0.861 | 69 |
| G04 | 796.2 | 0.596 | 41 | 0.822 | 84 |
| G05 | 796.2 | 0.563 | 39 | 0.835 | 86 |
| G06 | 796.2 | 0.612 | 42 | 0.835 | 90 |
| G07 | 794.2 | 0.654 | 45 | 0.837 | 89 |
| G08 | 784.2 | 0.467 | 33 | 0.818 | 69 |
| G09 | 782.2 | 0.364 | 26 | 0.844 | 68 |
| G10 | 780.2 | 0.278 | 20 | 0.843 | 64 |
| G11 | 770.2 | 0.219 | 16 | 0.840 | 49 |
| G12 | 850.3 | 0.000 | 0  |       |    |
| H01 | 865.3 | 0.642 | 41 | 0.770 | 77 |

|     |       |       |    |       |    |
|-----|-------|-------|----|-------|----|
| H02 | 879.3 | 0.220 | 14 | 0.771 | 51 |
| H03 | 959.3 | 0.218 | 13 | 0.902 | 73 |
| H04 | 919.3 | 0.185 | 11 | 0.870 | 55 |
| H05 | 784.2 | 0.346 | 24 | 0.829 | 63 |
| H06 | 800.2 | 0.094 | 6  | 0.815 | 23 |
| H07 | 844.2 | 0.449 | 29 | 0.819 | 74 |
| H08 | 497.1 | 0.345 | 38 | 0.935 | 61 |
| H09 | 429.1 | 0.000 | 0  |       |    |
| H10 | 400.1 | 0.000 | 0  |       |    |
| H11 | 332.1 | 0.302 | 50 | 0.464 | 95 |

Table S8. tDHU Plate 1 CAD Results

| Location | Mass Expected | Product Conc (mg/mL) | CAD Yield | Rt (min) | Purity % |
|----------|---------------|----------------------|-----------|----------|----------|
| A01      | 846.3         | 0.103                | 24        | 1.234    | 79       |
| A02      | 726.3         | 0.000                | 0         |          |          |
| A03      | 821.3         | 0.209                | 51        | 1.244    | 91       |
| A04      | 775.2         | 0.126                | 32        | 1.149    | 86       |
| A05      | 809.3         | 0.159                | 39        | 1.228    | 77       |
| A06      | 804.3         | 0.000                | 0         |          |          |
| A07      | 804.3         | 0.135                | 34        | 1.159    | 87       |
| A08      | 803.3         | 0.000                | 0         |          |          |
| A09      | 795.3         | 0.142                | 36        | 1.243    | 84       |
| A10      | 794.3         | 0.134                | 34        | 1.583    | 78       |
| A11      | 793.3         | 0.110                | 28        | 1.345    | 64       |
| A12      | 792.2         | 0.000                | 0         | 1.534    | 86       |
| B01      | 788.3         | 0.147                | 37        | 1.560    | 80       |
| B02      | 728.2         | 0.177                | 49        | 1.255    | 92       |
| B03      | 774.3         | 0.201                | 52        | 1.403    | 93       |
| B04      | 774.3         | 0.092                | 24        | 1.598    | 59       |
| B05      | 774.3         | 0.000                | 0         |          |          |
| B06      | 774.2         | 0.096                | 25        | 1.486    | 78       |
| B07      | 770.3         | 0.164                | 43        | 1.287    | 81       |
| B08      | 768.3         | 0.000                | 0         |          |          |
| B09      | 768.3         | 0.184                | 48        | 1.327    | 86       |
| B10      | 767.3         | 0.086                | 23        | 1.249    | 56       |
| B11      | 764.2         | 0.105                | 27        | 1.177    | 86       |
| B12      | 764.2         | 0.104                | 27        | 1.237    | 61       |
| C01      | 762.3         | 0.086                | 23        | 1.375    | 49       |
| C02      | 762.2         | 0.057                | 15        | 1.180    | 41       |
| C03      | 762.2         | 0.054                | 14        | 1.250    | 40       |
| C04      | 761.2         | 0.129                | 34        | 1.215    | 78       |
| C05      | 756.3         | 0.113                | 30        | 1.200    | 71       |
| C06      | 755.3         | 0.103                | 27        | 1.135    | 77       |
| C07      | 753.2         | 0.000                | 0         |          |          |
| C08      | 752.3         | 0.084                | 22        | 1.337    | 30       |

|     |       |       |    |       |    |
|-----|-------|-------|----|-------|----|
| C09 | 752.3 | 0.126 | 34 | 1.514 | 70 |
| C10 | 752.3 | 0.137 | 37 | 1.323 | 77 |
| C11 | 748.2 | 0.123 | 33 | 1.386 | 73 |
| C12 | 748.2 | 0.057 | 15 | 1.539 | 58 |
| D01 | 726.3 | 0.166 | 46 | 1.244 | 85 |
| D02 | 748.2 | 0.129 | 34 | 1.474 | 75 |
| D03 | 748.2 | 0.000 | 0  |       |    |
| D04 | 748.2 | 0.000 | 0  |       |    |
| D05 | 742.2 | 0.091 | 24 | 1.201 | 43 |
| D06 | 780.3 | 0.077 | 20 | 1.446 | 48 |
| D07 | 756.3 | 0.156 | 41 | 1.496 | 89 |
| D08 | 740.3 | 0.000 | 0  |       |    |
| D09 | 740.2 | 0.038 | 10 | 1.111 | 37 |
| D10 | 740.2 | 0.000 | 0  |       |    |
| D11 | 738.3 | 0.073 | 20 | 1.304 | 67 |
| D12 | 738.3 | 0.135 | 37 | 1.312 | 84 |
| E01 | 738.3 | 0.113 | 31 | 1.366 | 70 |
| E02 | 738.3 | 0.135 | 37 | 1.339 | 80 |
| E03 | 738.3 | 0.102 | 28 | 1.380 | 68 |
| E04 | 738.3 | 0.137 | 37 | 1.301 | 75 |
| E05 | 730.2 | 0.148 | 40 | 1.243 | 84 |
| E06 | 728.2 | 0.151 | 42 | 1.223 | 89 |
| E07 | 728.2 | 0.090 | 25 | 1.185 | 67 |
| E08 | 728.2 | 0.091 | 25 | 1.151 | 70 |
| E09 | 727.2 | 0.000 | 0  |       |    |
| E10 | 726.3 | 0.201 | 55 | 1.400 | 95 |
| E11 | 726.3 | 0.098 | 27 | 1.296 | 72 |
| E12 | 726.3 | 0.000 | 0  |       |    |
| F01 | 726.3 | 0.051 | 14 | 1.305 | 28 |
| F02 | 726.3 | 0.114 | 31 | 1.379 | 68 |
| F03 | 726.3 | 0.138 | 38 | 1.305 | 82 |
| F04 | 724.2 | 0.000 | 0  |       |    |
| F05 | 724.2 | 0.000 | 0  |       |    |
| F06 | 724.2 | 0.075 | 21 | 1.346 | 41 |
| F07 | 724.2 | 0.167 | 46 | 1.288 | 90 |
| F08 | 716.2 | 0.113 | 32 | 1.210 | 66 |
| F09 | 714.3 | 0.188 | 53 | 1.268 | 91 |
| F10 | 714.3 | 0.129 | 36 | 1.259 | 75 |
| F11 | 714.3 | 0.000 | 0  |       |    |
| F12 | 714.3 | 0.000 | 0  | 1.360 | 20 |
| G01 | 712.2 | 0.044 | 12 | 1.300 | 45 |
| G02 | 712.2 | 0.114 | 32 | 1.386 | 77 |
| G03 | 712.2 | 0.000 | 0  |       |    |
| G04 | 712.2 | 0.162 | 46 | 1.215 | 85 |
| G05 | 712.2 | 0.135 | 38 | 1.246 | 83 |
| G06 | 712.2 | 0.143 | 40 | 1.269 | 78 |
| G07 | 710.2 | 0.144 | 41 | 1.246 | 86 |
| G08 | 700.2 | 0.059 | 17 | 1.208 | 60 |
| G09 | 698.2 | 0.160 | 46 | 1.277 | 83 |

|     |       |       |    |       |    |
|-----|-------|-------|----|-------|----|
| G10 | 740.3 | 0.201 | 54 | 1.303 | 93 |
| G11 | 686.2 | 0.130 | 38 | 1.292 | 79 |
| G12 | 766.3 | 0.174 | 45 | 1.431 | 88 |
| H01 | 781.3 | 0.132 | 34 | 1.103 | 81 |
| H02 | 795.3 | 0.109 | 27 | 1.120 | 74 |
| H03 | 875.3 | 0.119 | 27 | 1.443 | 79 |
| H04 | 835.3 | 0.092 | 22 | 1.340 | 56 |
| H05 | 700.2 | 0.129 | 37 | 1.213 | 71 |
| H06 | 716.2 | 0.167 | 47 | 1.200 | 91 |
| H07 | 760.3 | 0.190 | 50 | 1.219 | 91 |
| H08 | 497.1 | 0.169 | 68 | 1.517 | 88 |
| H09 | 345.1 | 0.080 | 46 | 0.591 | 87 |
| H10 | 400.1 | 0.000 | 0  |       |    |
| H11 | 248.1 | 0.000 | 0  | 0.465 | 53 |
| H12 | 115.0 | 0.000 | 0  |       |    |

Table S9. tDHU Plate 2 CAD Results

| Location | Mass Expected | Product Conc (mg/mL) | CAD Yield | Rt (min) | Purity % |
|----------|---------------|----------------------|-----------|----------|----------|
| A01      | 846.3         | 0.122                | 29        | 1.230    | 84       |
| A02      | 726.3         | 0.000                | 0         |          |          |
| A03      | 821.3         | 0.183                | 44        | 1.243    | 91       |
| A04      | 775.2         | 0.084                | 22        | 1.148    | 63       |
| A05      | 809.3         | 0.146                | 36        | 1.225    | 77       |
| A06      | 804.3         | 0.129                | 32        | 1.162    | 86       |
| A07      | 804.3         | 0.128                | 32        | 1.156    | 76       |
| A08      | 803.3         | 0.000                | 0         |          |          |
| A09      | 795.3         | 0.140                | 35        | 1.241    | 86       |
| A10      | 794.3         | 0.130                | 33        | 1.580    | 73       |
| A11      | 793.3         | 0.153                | 39        | 1.342    | 81       |
| A12      | 792.2         | 0.219                | 55        | 1.532    | 92       |
| B01      | 788.3         | 0.147                | 37        | 1.560    | 86       |
| B02      | 728.2         | 0.161                | 44        | 1.254    | 88       |
| B03      | 774.3         | 0.179                | 46        | 1.400    | 90       |
| B04      | 774.3         | 0.000                | 0         |          |          |
| B05      | 774.3         | 0.000                | 0         |          |          |
| B06      | 774.2         | 0.084                | 22        | 1.483    | 71       |
| B07      | 770.3         | 0.155                | 40        | 1.286    | 75       |
| B08      | 768.3         | 0.000                | 0         | 1.113    | 12       |
| B09      | 768.3         | 0.114                | 30        | 1.327    | 81       |
| B10      | 767.3         | 0.122                | 32        | 1.250    | 76       |
| B11      | 764.2         | 0.094                | 25        | 1.176    | 82       |
| B12      | 764.2         | 0.097                | 25        | 1.236    | 75       |
| C01      | 762.3         | 0.137                | 36        | 1.375    | 77       |
| C02      | 762.2         | 0.048                | 13        | 1.180    | 42       |
| C03      | 762.2         | 0.080                | 21        | 1.249    | 49       |
| C04      | 761.2         | 0.100                | 26        | 1.215    | 70       |
| C05      | 756.3         | 0.127                | 34        | 1.200    | 62       |

|     |       |       |    |       |    |
|-----|-------|-------|----|-------|----|
| C06 | 755.3 | 0.114 | 30 | 1.134 | 77 |
| C07 | 753.2 | 0.000 | 0  |       |    |
| C08 | 752.3 | 0.000 | 0  |       |    |
| C09 | 752.3 | 0.069 | 18 | 1.515 | 61 |
| C10 | 752.3 | 0.165 | 44 | 1.243 | 5  |
| C11 | 748.2 | 0.122 | 32 | 1.386 | 77 |
| C12 | 748.2 | 0.121 | 32 | 1.539 | 76 |
| D01 | 726.3 | 0.154 | 42 | 1.244 | 85 |
| D02 | 748.2 | 0.074 | 20 | 1.474 | 67 |
| D03 | 748.2 | 0.000 | 0  | 1.343 | 14 |
| D04 | 748.2 | 0.000 | 0  |       |    |
| D05 | 742.2 | 0.124 | 33 | 1.202 | 55 |
| D06 | 780.3 | 0.095 | 24 | 1.448 | 51 |
| D07 | 756.3 | 0.144 | 38 | 1.495 | 87 |
| D08 | 740.3 | 0.000 | 0  | 1.392 | 11 |
| D09 | 740.2 | 0.093 | 25 | 1.110 | 68 |
| D10 | 740.2 | 0.000 | 0  |       |    |
| D11 | 738.3 | 0.000 | 0  |       |    |
| D12 | 738.3 | 0.152 | 41 | 1.312 | 82 |
| E01 | 738.3 | 0.071 | 19 | 1.366 | 58 |
| E02 | 738.3 | 0.160 | 43 | 1.339 | 79 |
| E03 | 738.3 | 0.102 | 28 | 1.380 | 68 |
| E04 | 738.3 | 0.091 | 25 | 1.301 | 63 |
| E05 | 730.2 | 0.119 | 33 | 1.242 | 78 |
| E06 | 728.2 | 0.171 | 47 | 1.224 | 90 |
| E07 | 728.2 | 0.117 | 32 | 1.184 | 75 |
| E08 | 728.2 | 0.071 | 20 | 1.150 | 68 |
| E09 | 727.2 | 0.000 | 0  | 1.134 | 24 |
| E10 | 726.3 | 0.152 | 42 | 1.400 | 85 |
| E11 | 726.3 | 0.091 | 25 | 1.295 | 75 |
| E12 | 726.3 | 0.069 | 19 | 1.525 | 60 |
| F01 | 726.3 | 0.000 | 0  |       |    |
| F02 | 726.3 | 0.129 | 36 | 1.378 | 77 |
| F03 | 726.3 | 0.101 | 28 | 1.305 | 76 |
| F04 | 724.2 | 0.108 | 30 | 1.242 | 36 |
| F05 | 724.2 | 0.000 | 0  |       |    |
| F06 | 724.2 | 0.078 | 22 | 1.347 | 41 |
| F07 | 724.2 | 0.136 | 37 | 1.289 | 81 |
| F08 | 716.2 | 0.109 | 30 | 1.209 | 61 |
| F09 | 714.3 | 0.139 | 39 | 1.267 | 92 |
| F10 | 714.3 | 0.124 | 35 | 1.258 | 74 |
| F11 | 714.3 | 0.000 | 0  |       |    |
| F12 | 714.3 | 0.000 | 0  |       |    |
| G01 | 712.2 | 0.099 | 28 | 1.300 | 79 |
| G02 | 712.2 | 0.083 | 23 | 1.386 | 66 |
| G03 | 712.2 | 0.155 | 44 | 1.370 | 60 |
| G04 | 712.2 | 0.126 | 35 | 1.216 | 75 |
| G05 | 712.2 | 0.098 | 28 | 1.246 | 78 |
| G06 | 712.2 | 0.155 | 44 | 1.270 | 85 |

|     |       |       |    |       |    |
|-----|-------|-------|----|-------|----|
| G07 | 710.2 | 0.158 | 44 | 1.246 | 87 |
| G08 | 700.2 | 0.138 | 39 | 1.208 | 80 |
| G09 | 698.2 | 0.146 | 42 | 1.276 | 86 |
| G10 | 740.3 | 0.197 | 53 | 1.302 | 92 |
| G11 | 686.2 | 0.112 | 33 | 1.292 | 72 |
| G12 | 766.3 | 0.171 | 45 | 1.431 | 89 |
| H01 | 781.3 | 0.194 | 50 | 1.102 | 80 |
| H02 | 795.3 | 0.150 | 38 | 1.120 | 80 |
| H03 | 875.3 | 0.162 | 37 | 1.442 | 82 |
| H04 | 835.3 | 0.074 | 18 | 1.340 | 58 |
| H05 | 700.2 | 0.124 | 35 | 1.213 | 85 |
| H06 | 716.2 | 0.141 | 40 | 1.200 | 88 |
| H07 | 760.3 | 0.185 | 49 | 1.219 | 88 |
| H08 | 497.1 | 0.170 | 68 | 1.517 | 88 |
| H09 | 345.1 | 0.076 | 44 | 0.593 | 87 |
| H10 | 400.1 | 0.150 | 75 | 1.250 | 94 |
| H11 | 248.1 | 0.085 | 69 | 0.364 | 2  |
| H12 | 115.0 | 0.000 | 0  |       |    |

Table S10. Results of D2B Synthesis by N-Boc-diamine linker

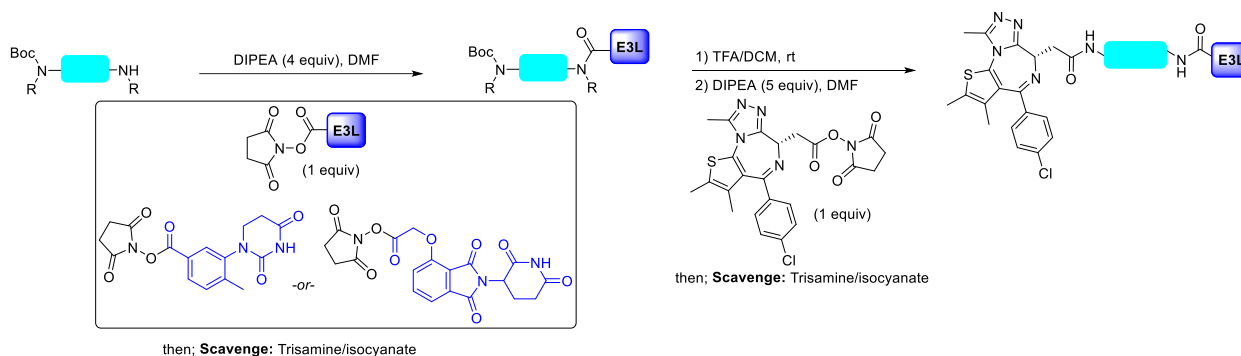

Yields as determined by CAD. Purity as determined by UV-Vis (TWC). Yields and Purity reported as decimal values.

| Structure                   | Plate ID | well location | CAS | MFCD         | (Run 1) Yield | (Run 1) Purity | (Run 2) Yield | (Run 2) Purity |
|-----------------------------|----------|---------------|-----|--------------|---------------|----------------|---------------|----------------|
| <br><chem>C18H30N4O2</chem> | O-Pom    | A01           |     | MFCD29054895 | 0.00          | 0.00           | 0.16          | 0.61           |



|                                                                                                                                                        |       |     |              |              |      |      |      |      |
|--------------------------------------------------------------------------------------------------------------------------------------------------------|-------|-----|--------------|--------------|------|------|------|------|
| 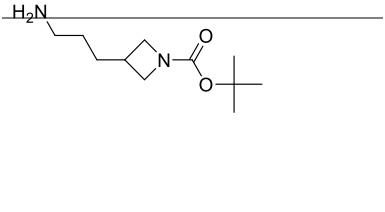 <p style="text-align: center;"><math>C_{11}H_{22}N_2O_2</math></p>   | O-Pom | A02 | 1205750-48-6 | MFCD14582364 | 0.00 | 0.00 | 0.00 | 0.00 |
|  <p style="text-align: center;"><math>C_{15}H_{27}N_5O_2</math></p>   | O-Pom | A03 |              |              | 0.18 | 0.85 | 0.21 | 0.76 |
|  <p style="text-align: center;"><math>C_{16}H_{26}N_4O_2</math></p>   | O-Pom | A04 | 2138071-17-5 |              | 0.14 | 0.72 | 0.11 | 0.71 |
|  <p style="text-align: center;"><math>C_{15}H_{27}N_3O_3</math></p>  | O-Pom | A05 | 887587-18-0  | MFCD07367784 | 0.22 | 0.84 | 0.23 | 0.84 |
|  <p style="text-align: center;"><math>C_{15}H_{24}N_4O_2</math></p> | O-Pom | A06 | 910036-87-2  | MFCD09787492 | 0.09 | 0.49 | 0.16 | 0.73 |
|  <p style="text-align: center;"><math>C_{15}H_{24}N_4O_2</math></p> | O-Pom | A07 | 874880-91-8  | MFCD08059435 | 0.13 | 0.61 | 0.3  | 0.74 |

|                                                                                                              |       |     |              |              |      |      |      |      |
|--------------------------------------------------------------------------------------------------------------|-------|-----|--------------|--------------|------|------|------|------|
| 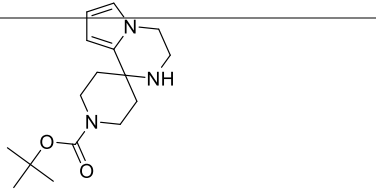<br>$C_{16}H_{25}N_3O_2$    | O-Pom | A08 | 1392466-65-7 | MFCD28714538 | 0.00 | 0.00 | 0.31 | 0.75 |
| <br>$C_{15}H_{29}N_3O_2$    | O-Pom | A09 |              |              | 0.24 | 0.89 | 0.16 | 0.74 |
| <br>$C_{16}H_{30}N_2O_2$    | O-Pom | A10 |              |              | 0.21 | 0.57 | 0.17 | 0.37 |
| <br>$C_{14}H_{23}N_3O_3$   | O-Pom | A11 | 2260935-83-7 |              | 0.1  | 0.49 | 0.1  | 0.47 |
| <br>$C_{15}H_{21}FN_2O_2$ | O-Pom | A12 | 1218764-14-7 | MFCD28502837 | 0.32 | 0.92 | 0.37 | 0.94 |
| <br>$C_{16}H_{24}N_2O_2$  | O-Pom | B01 | 1211581-86-0 | MFCD22681611 | 0.11 | 0.28 | 0.06 | 0.2  |

|                                                                                                                |       |     |              |              |      |      |      |      |
|----------------------------------------------------------------------------------------------------------------|-------|-----|--------------|--------------|------|------|------|------|
| 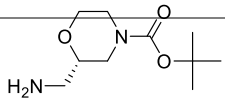                              | O-Pom | B02 | 879403-42-6  | MFCD11707017 | 0.22 | 0.86 | 0.19 | 0.81 |
| $C_{10}H_{20}N_2O_3$<br>      | O-Pom | B03 |              |              | 0.17 | 0.47 | 0.19 | 0.59 |
| $C_{15}H_{22}N_2O_2$<br>      | O-Pom | B04 | 150417-17-7  | MFCD11506157 | 0.00 | 0.00 | 0.00 | 0.12 |
| $C_{15}H_{22}N_2O_2$<br>     | O-Pom | B05 | 1240583-48-5 | MFCD08685943 | 0.00 | 0.00 | 0.00 | 0.00 |
|                             | O-Pom | B06 | 1935075-16-3 | MFCD29042916 | 0.34 | 0.95 | 0.25 | 0.72 |
| $C_{12}H_{20}F_2N_2O_2$<br> | O-Pom | B07 | 1376134-81-4 | MFCD22056502 | 0.34 | 0.83 | 0.4  | 0.78 |
| $C_{13}H_{26}N_2O_3$                                                                                           |       |     |              |              |      |      |      |      |

|                                                                                                             |       |     |              |              |      |      |      |      |
|-------------------------------------------------------------------------------------------------------------|-------|-----|--------------|--------------|------|------|------|------|
| 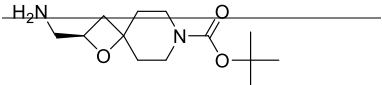<br>$C_{13}H_{24}N_2O_3$   | O-Pom | B08 | 1403766-68-6 | MFCD22628730 | 0.00 | 0.12 | 0.03 | 0.00 |
| <br>$C_{13}H_{24}N_2O_3$   | O-Pom | B09 |              |              | 0.27 | 0.84 | 0.17 | 0.67 |
| <br>$C_{11}H_{21}N_5O_2$   | O-Pom | B10 |              |              | 0.00 | 0.18 | 0.06 | 0.18 |
| <br>$C_{12}H_{20}N_4O_2$  | O-Pom | B11 | 1251000-58-4 | MFCD17017184 | 0.07 | 0.56 | 0.09 | 0.49 |
| <br>$C_{12}H_{20}N_4O_2$ | O-Pom | B12 | 1391733-77-9 | MFCD23378346 | 0.00 | 0.00 | 0.00 | 0.00 |
| <br>$C_{14}H_{22}N_2O_2$ | O-Pom | C01 | 187283-19-8  | MFCD06804563 | 0.24 | 0.79 | 0.2  | 0.61 |

|                                                                                                                            |       |     |              |              |      |      |      |      |
|----------------------------------------------------------------------------------------------------------------------------|-------|-----|--------------|--------------|------|------|------|------|
| 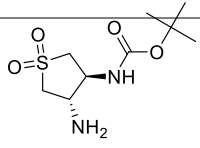 <p><math>C_9H_{18}N_2O_4S</math></p>     | O-Pom | C02 |              | MFCD30343000 | 0.17 | 0.82 | 0.14 | 0.44 |
|  <p><math>C_9H_{18}N_2O_4S</math></p>     | O-Pom | C03 |              | MFCD30492185 | 0.13 | 0.32 | 0.39 | 0.82 |
|  <p><math>C_{13}H_{19}N_3O_2</math></p>   | O-Pom | C04 | 2167677-73-6 |              | 0.35 | 0.91 | 0.33 | 0.9  |
|  <p><math>C_{12}H_{24}N_2O_3</math></p>  | O-Pom | C05 | 493026-47-4  | MFCD22397604 | 0.2  | 0.59 | 0.11 | 0.31 |
|  <p><math>C_{12}H_{25}N_3O_2</math></p> | O-Pom | C06 | 539822-98-5  | MFCD09758985 | 0.34 | 0.92 | 0.46 | 0.92 |
|  <p><math>C_{11}H_{19}N_3O_3</math></p> | O-Pom | C07 | 1839060-95-5 | MFCD29043065 | 0.11 | 0.51 | 0.15 | 0.51 |

|                                                                                                             |       |     |              |              |      |      |      |      |
|-------------------------------------------------------------------------------------------------------------|-------|-----|--------------|--------------|------|------|------|------|
| 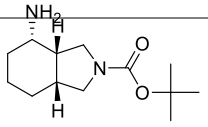<br>$C_{13}H_{24}N_2O_2$   | O-Pom | C08 | 1251001-17-8 | MFCD09753917 | 0.47 | 0.54 | 0.53 | 0.92 |
| <br>$C_{13}H_{24}N_2O_2$   | O-Pom | C09 |              |              | 0.27 | 0.82 | 0.15 | 0.7  |
| <br>$C_{13}H_{24}N_2O_2$   | O-Pom | C10 | 2361822-74-2 |              | 0.45 | 0.85 | 0.12 | 0.52 |
| <br>$C_{13}H_{20}N_2O_2$  | O-Pom | C11 | 108467-99-8  | MFCD01317800 | 0.22 | 0.78 | 0.28 | 0.81 |
| <br>$C_{13}H_{20}N_2O_2$ | O-Pom | C12 | 137102-30-8  | MFCD09885895 | 0.18 | 0.53 | 0.3  | 0.81 |
| <br>$C_{11}H_{22}N_2O_2$ | O-Pom | D01 | 135632-53-0  |              | 0.26 | 0.69 | 0.3  | 0.81 |

|                                                                                                              |       |     |              |              |      |      |      |      |
|--------------------------------------------------------------------------------------------------------------|-------|-----|--------------|--------------|------|------|------|------|
| 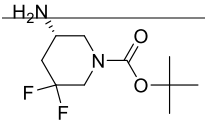<br>$C_{10}H_{18}F_2N_2O_2$ | O-Pom | D02 | 2055848-76-3 | MFCD30531337 | 0.15 | 0.7  | 0.07 | 0.51 |
| <br>$C_{10}H_{18}F_2N_2O_2$ | O-Pom | D03 | 1932109-72-2 | MFCD30097677 | 0.36 | 0.94 | 0.41 | 0.92 |
| <br>$C_{10}H_{18}F_2N_2O_2$ | O-Pom | D04 | 2089320-98-7 |              | 0.29 | 0.89 | 0.39 | 0.9  |
| <br>$C_{11}H_{22}N_2O_3$   | O-Pom | D05 | 203186-96-3  | MFCD11845683 | 0.36 | 0.81 | 0.45 | 0.79 |
| <br>$C_{15}H_{28}N_2O_2$  | O-Pom | D06 | 171049-35-7  | MFCD02179169 | 0.17 | 0.53 | 0.23 | 0.63 |
| <br>$C_{13}H_{28}N_2O_2$  | O-Pom | D07 | 88829-82-7   | MFCD02094499 | 0.16 | 0.7  | 0.28 | 0.83 |

|                                                                                                             |       |     |              |              |      |      |      |      |
|-------------------------------------------------------------------------------------------------------------|-------|-----|--------------|--------------|------|------|------|------|
| 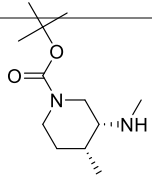<br>$C_{12}H_{24}N_2O_2$   | O-Pom | D08 | 1312762-44-9 | MFCD26954785 | 0.08 | 0.37 | 0.03 | 0.29 |
| <br>$C_{11}H_{20}N_2O_3$   | O-Pom | D09 | 2241138-06-5 |              | 0.16 | 0.46 | 0.12 | 0.37 |
| <br>$C_{11}H_{20}N_2O_3$   | O-Pom | D10 | 1251002-01-3 | MFCD14581204 | 0.06 | 0.14 | 0.00 | 0.15 |
| <br>$C_{12}H_{22}N_2O_2$  | O-Pom | D11 | 1784225-34-8 |              | 0.37 | 0.91 | 0.46 | 0.9  |
| <br>$C_{12}H_{22}N_2O_2$ | O-Pom | D12 |              |              | 0.35 | 0.89 | 0.00 | 0.00 |
| <br>$C_{12}H_{22}N_2O_2$ | O-Pom | E01 | 159991-07-8  | MFCD11973767 | 0.00 | 0.00 | 0.00 | 0.00 |



|                                                                                                             |       |     |              |              |      |      |      |      |
|-------------------------------------------------------------------------------------------------------------|-------|-----|--------------|--------------|------|------|------|------|
| 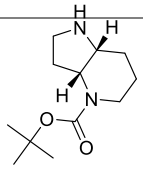<br>$C_{12}H_{22}N_2O_2$   | O-Pom | E02 | 1277168-52-1 | MFCD22394610 | 0.07 | 0.46 | 0.05 | 0.48 |
| <br>$C_{12}H_{22}N_2O_2$   | O-Pom | E03 | 1251002-00-2 | MFCD14581197 | 0.16 | 0.7  | 0.38 | 0.38 |
| <br>$C_{12}H_{22}N_2O_2$   | O-Pom | E04 | 896464-16-7  | MFCD09839640 | 0.29 | 0.88 | 0.34 | 0.88 |
| <br>$C_{10}H_{22}N_2O_3$  | O-Pom | E05 | 436857-02-2  | MFCD24465872 | 0.28 | 0.86 | 0.43 | 0.87 |
| <br>$C_{10}H_{20}N_2O_3$ | O-Pom | E06 | 898271-41-5  | MFCD24637702 | 0.33 | 0.81 | 0.19 | 0.48 |
| <br>$C_{10}H_{20}N_2O_3$ | O-Pom | E07 | 663948-85-4  | MFCD08704519 | 0.19 | 0.53 | 0.35 | 0.78 |

|                                                                                                             |       |     |              |              |      |      |      |      |
|-------------------------------------------------------------------------------------------------------------|-------|-----|--------------|--------------|------|------|------|------|
| 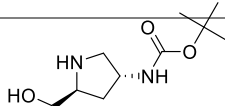<br>$C_{10}H_{20}N_2O_3$   | O-Pom | E08 | 1217975-63-7 | MFCD08704528 | 0.29 | 0.78 | 0.35 | 0.78 |
| <br>$C_9H_{17}N_3O_3$      | O-Pom | E09 | 1254120-14-3 | MFCD21842621 | 0.19 | 0.82 | 0.26 | 0.79 |
| <br>$C_{11}H_{22}N_2O_2$   | O-Pom | E10 |              |              | 0.39 | 0.97 | 0.18 | 0.66 |
| <br>$C_{11}H_{22}N_2O_2$  | O-Pom | E11 | 177906-48-8  | MFCD03001719 | 0.24 | 0.84 | 0.3  | 0.76 |
| <br>$C_{11}H_{22}N_2O_2$ | O-Pom | E12 | 1408057-41-9 | MFCD23106103 | 0.16 | 0.78 | 0.22 | 0.76 |
| <br>$C_{11}H_{22}N_2O_2$ | O-Pom | F01 |              |              | 0.26 | 0.76 | 0.13 | 0.38 |

|                                                                                                             |       |     |              |              |      |      |      |      |
|-------------------------------------------------------------------------------------------------------------|-------|-----|--------------|--------------|------|------|------|------|
| 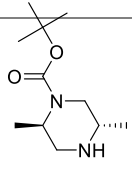<br>$C_{11}H_{22}N_2O_2$   | O-Pom | F02 | 309915-46-6  | MFCD06797728 | 0.14 | 0.66 | 0.14 | 0.75 |
| <br>$C_{11}H_{22}N_2O_2$   | O-Pom | F03 | 879275-33-9  | MFCD03093384 | 0.25 | 0.76 | 0.33 | 0.78 |
| <br>$C_{11}H_{20}N_2O_2$   | O-Pom | F04 | 1250997-08-0 | MFCD20231336 | 0.53 | 0.96 | 0.35 | 0.25 |
| <br>$C_{11}H_{20}N_2O_2$  | O-Pom | F05 |              |              | 0.49 | 0.94 | 0.00 | 0.00 |
| <br>$C_{11}H_{20}N_2O_2$ | O-Pom | F06 |              |              | 0.3  | 0.77 | 0.07 | 0.33 |
| <br>$C_{11}H_{20}N_2O_2$ | O-Pom | F07 | 1638765-05-5 | MFCD27987305 | 0.26 | 0.76 | 0.36 | 0.77 |

|                                                                                                             |       |     |              |              |      |      |      |      |
|-------------------------------------------------------------------------------------------------------------|-------|-----|--------------|--------------|------|------|------|------|
| 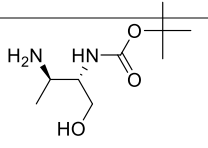<br>$C_9H_{20}N_2O_3$      | O-Pom | F08 |              |              | 0.36 | 0.69 | 0.13 | 0.55 |
| <br>$C_{10}H_{22}N_2O_2$   | O-Pom | F09 | 144222-23-1  | MFCD03001681 | 0.35 | 0.87 | 0.45 | 0.9  |
| <br>$C_{10}H_{22}N_2O_2$   | O-Pom | F10 | 123183-72-2  | MFCD14155832 | 0.26 | 0.83 | 0.2  | 0.78 |
| <br>$C_{10}H_{22}N_2O_2$  | O-Pom | F11 | 134597-95-8  | MFCD14529626 | 0.19 | 0.65 | 0.17 | 0.58 |
| <br>$C_{10}H_{22}N_2O_2$ | O-Pom | F12 | 869901-70-2  | MFCD18909493 | 0.18 | 0.47 | 0.31 | 0.59 |
| <br>$C_{10}H_{20}N_2O_2$ | O-Pom | G01 | 1392803-14-3 | MFCD23106178 | 0.00 | 0.28 | 0.09 | 0.57 |

|                                                                                                             |       |     |             |              |      |      |      |      |
|-------------------------------------------------------------------------------------------------------------|-------|-----|-------------|--------------|------|------|------|------|
| 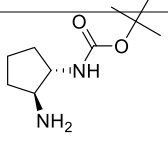<br>$C_{10}H_{20}N_2O_2$   | O-Pom | G02 | 586961-34-4 | MFCD11040590 | 0.28 | 0.86 | 0.27 | 0.74 |
| <br>$C_{10}H_{20}N_2O_2$   | O-Pom | G03 | 119020-01-8 | MFCD03419257 | 0.1  | 0.59 | 0.14 | 0.69 |
| <br>$C_{10}H_{20}N_2O_2$   | O-Pom | G04 | 173340-25-5 | MFCD06796615 | 0.14 | 0.65 | 0.41 | 0.84 |
| <br>$C_{10}H_{20}N_2O_2$  | O-Pom | G05 | 73874-95-0  | MFCD00798171 | 0.33 | 0.87 | 0.39 | 0.86 |
| <br>$C_{10}H_{20}N_2O_2$ | O-Pom | G06 |             |              | 0.37 | 0.95 | 0.42 | 0.9  |
| <br>$C_{10}H_{18}N_2O_2$ | O-Pom | G07 | 181941-45-7 | MFCD18431936 | 0.3  | 0.87 | 0.45 | 0.89 |

|                                                                                                                                                        |       |     |              |              |      |      |      |      |
|--------------------------------------------------------------------------------------------------------------------------------------------------------|-------|-----|--------------|--------------|------|------|------|------|
| 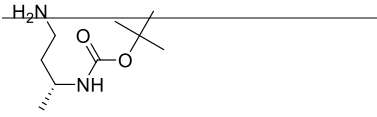 <p style="text-align: center;"><math>C_9H_{20}N_2O_2</math></p>      | O-Pom | G08 | 170367-69-8  | MFCD06804538 | 0.38 | 0.89 | 0.33 | 0.69 |
|  <p style="text-align: center;"><math>C_9H_{18}N_2O_2</math></p>      | O-Pom | G09 |              |              | 0.18 | 0.48 | 0.26 | 0.68 |
|  <p style="text-align: center;"><math>C_9H_{16}N_2O_2</math></p>      | O-Pom | G10 |              | MFCD20694702 | 0.16 | 0.59 | 0.2  | 0.64 |
|  <p style="text-align: center;"><math>C_8H_{18}N_2O_2</math></p>     | O-Pom | G11 | 146552-71-8  | MFCD08726031 | 0.17 | 0.63 | 0.16 | 0.49 |
|  <p style="text-align: center;"><math>C_{14}H_{26}N_2O_2</math></p> | O-Pom | G12 | 1160247-15-3 |              | 0.00 | 0.00 | 0.00 | 0.00 |
|  <p style="text-align: center;"><math>C_{14}H_{27}N_3O_2</math></p> | O-Pom | H01 |              |              | 0.32 | 0.87 | 0.41 | 0.77 |

|                                                                                                             |       |     |             |              |      |      |      |      |      |
|-------------------------------------------------------------------------------------------------------------|-------|-----|-------------|--------------|------|------|------|------|------|
| 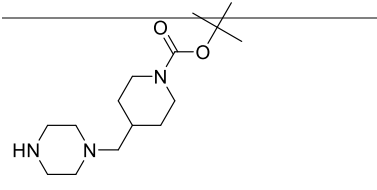<br>$C_{15}H_{29}N_3O_2$   | O-Pom | H02 | 381722-48-1 |              |      | 0.08 | 0.31 | 0.14 | 0.51 |
| <br>$C_{18}H_{29}N_5O_3$   | O-Pom | H03 |             |              |      | 0.17 | 0.37 | 0.13 | 0.73 |
| <br>$C_{15}H_{25}N_5O_3$   | O-Pom | H04 |             |              |      | 0.1  | 0.39 | 0.11 | 0.55 |
| <br>$C_9H_{20}N_2O_2$     | O-Pom | H05 | 68076-36-8  | MFCD00210019 | 0.00 | 0.00 | 0.24 | 0.63 |      |
| <br>$C_9H_{20}N_2O_3$    | O-Pom | H06 | 127828-22-2 | MFCD12031501 | 0.00 | 0.11 | 0.06 | 0.23 |      |
| <br>$C_{11}H_{24}N_2O_4$ | O-Pom | H07 | 153086-78-3 | MFCD03788155 | 0.23 | 0.66 | 0.29 | 0.74 |      |

|                                                                                                             |      |     |              |              |      |      |      |      |
|-------------------------------------------------------------------------------------------------------------|------|-----|--------------|--------------|------|------|------|------|
| 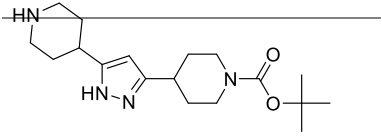<br>$C_{18}H_{30}N_4O_2$   | tDHU | A01 |              | MFCD29054895 | 0.24 | 0.79 | 0.29 | 0.84 |
| <br>$C_{11}H_{22}N_2O_2$   | tDHU | A02 | 1205750-48-6 | MFCD14582364 | 0.00 | 0.00 | 0.00 | 0.00 |
| <br>$C_{15}H_{27}N_5O_2$   | tDHU | A03 |              |              | 0.51 | 0.91 | 0.45 | 0.92 |
| <br>$C_{14}H_{21}N_3O_2$  | tDHU | A04 |              |              | 0.33 | 0.86 | 0.22 | 0.63 |
| <br>$C_{15}H_{27}N_3O_3$ | tDHU | A05 | 887587-18-0  | MFCD07367784 | 0.39 | 0.77 | 0.36 | 0.78 |
| <br>$C_{15}H_{24}N_4O_2$ | tDHU | A06 | 910036-87-2  | MFCD09787492 | 0.27 | 0.79 | 0.32 | 0.85 |



|                                                                                                              |      |     |              |              |      |      |      |      |
|--------------------------------------------------------------------------------------------------------------|------|-----|--------------|--------------|------|------|------|------|
| 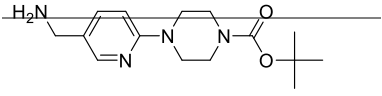<br>$C_{15}H_{24}N_4O_2$    | tDHU | A07 | 874880-91-8  | MFCD08059435 | 0.34 | 0.87 | 0.32 | 0.78 |
| <br>$C_{16}H_{25}N_3O_2$    | tDHU | A08 | 1392466-65-7 | MFCD28714538 | 0.00 | 0.00 | 0.00 | 0.00 |
| <br>$C_{15}H_{29}N_3O_2$    | tDHU | A09 |              |              | 0.36 | 0.84 | 0.35 | 0.86 |
| <br>$C_{16}H_{30}N_2O_2$   | tDHU | A10 |              |              | 0.34 | 0.78 | 0.33 | 0.81 |
| <br>$C_{14}H_{23}N_3O_3$  | tDHU | A11 | 2260935-83-7 |              | 0.28 | 0.64 | 0.39 | 0.82 |
| <br>$C_{15}H_{21}FN_2O_2$ | tDHU | A12 | 1218764-14-7 | MFCD28502837 | 0.00 | 0.86 | 0.56 | 0.91 |

|                                                                                                                            |      |     |              |              |      |      |      |      |
|----------------------------------------------------------------------------------------------------------------------------|------|-----|--------------|--------------|------|------|------|------|
| 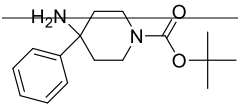                                          | tDHU | B01 | 1211581-86-0 | MFCD22681611 | 0.37 | 0.8  | 0.37 | 0.86 |
| <p><math>C_{16}H_{24}N_2O_2</math></p>    | tDHU | B02 | 879403-42-6  | MFCD11707017 | 0.49 | 0.92 | 0.44 | 0.9  |
| <p><math>C_{10}H_{20}N_2O_3</math></p>    | tDHU | B03 |              |              | 0.52 | 0.93 | 0.46 | 0.9  |
| <p><math>C_{15}H_{22}N_2O_2</math></p>   | tDHU | B04 | 150417-17-7  | MFCD11506157 | 0.24 | 0.59 | 0.00 | 0.23 |
| <p><math>C_{15}H_{22}N_2O_2</math></p>  | tDHU | B05 | 1240583-48-5 | MFCD08685943 | 0.00 | 0.00 | 0.00 | 0.00 |
| <p><math>C_{15}H_{22}N_2O_2</math></p>  | tDHU | B06 | 1935075-16-3 | MFCD29042916 | 0.25 | 0.78 | 0.22 | 0.71 |
| <p><math>C_{12}H_{20}F_2N_2O_2</math></p>                                                                                  |      |     |              |              |      |      |      |      |

|                                                                                                             |      |     |              |              |      |      |      |      |
|-------------------------------------------------------------------------------------------------------------|------|-----|--------------|--------------|------|------|------|------|
| 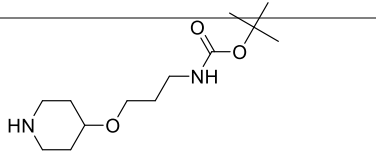<br>$C_{13}H_{26}N_2O_3$   | tDHU | B07 | 1376134-81-4 | MFCD22056502 | 0.43 | 0.81 | 0.4  | 0.77 |
| <br>$C_{13}H_{24}N_2O_3$   | tDHU | B08 | 1403766-68-6 | MFCD22628730 | 0.00 | 0.00 | 0.00 | 0.00 |
| <br>$C_{13}H_{24}N_2O_3$   | tDHU | B09 |              |              | 0.48 | 0.86 | 0.3  | 0.82 |
| <br>$C_{11}H_{21}N_5O_2$  | tDHU | B10 |              |              | 0.23 | 0.56 | 0.32 | 0.77 |
| <br>$C_{12}H_{20}N_4O_2$ | tDHU | B11 | 1251000-58-4 | MFCD17017184 | 0.28 | 0.86 | 0.25 | 0.81 |
| <br>$C_{12}H_{20}N_4O_2$ | tDHU | B12 | 1391733-77-9 | MFCD23378346 | 0.27 | 0.61 | 0.25 | 0.75 |

|                                                                                                             |      |     |              |              |      |      |      |      |
|-------------------------------------------------------------------------------------------------------------|------|-----|--------------|--------------|------|------|------|------|
| 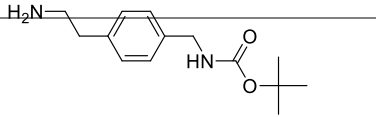<br>$C_{14}H_{22}N_2O_2$   | tDHU | C01 | 187283-19-8  | MFCD06804563 | 0.23 | 0.49 | 0.36 | 0.78 |
| <br>$C_9H_{18}N_2O_4S$     | tDHU | C02 |              | MFCD30343000 | 0.17 | 0.77 | 0.12 | 0.71 |
| <br>$C_9H_{18}N_2O_4S$     | tDHU | C03 |              | MFCD30492185 | 0.14 | 0.67 | 0.21 | 0.86 |
| <br>$C_{13}H_{19}N_3O_2$  | tDHU | C04 | 2167677-73-6 |              | 0.34 | 0.78 | 0.26 | 0.68 |
| <br>$C_{12}H_{24}N_2O_3$ | tDHU | C05 | 493026-47-4  | MFCD22397604 | 0.3  | 0.71 | 0.34 | 0.61 |
| <br>$C_{12}H_{25}N_3O_2$ | tDHU | C06 | 539822-98-5  | MFCD09758985 | 0.27 | 0.77 | 0.3  | 0.77 |

|                                                                                                             |      |     |              |              |      |      |      |      |
|-------------------------------------------------------------------------------------------------------------|------|-----|--------------|--------------|------|------|------|------|
| 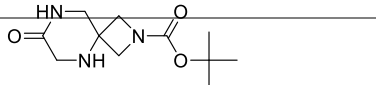<br>$C_{11}H_{19}N_3O_3$   | tDHU | C07 | 1839060-95-5 | MFCD29043065 | 0.00 | 0.00 | 0.00 | 0.00 |
| <br>$C_{13}H_{24}N_2O_2$   | tDHU | C08 | 1251001-17-8 | MFCD09753917 | 0.22 | 0.76 | 0.27 | 0.88 |
| <br>$C_{13}H_{24}N_2O_2$   | tDHU | C09 |              |              | 0.34 | 0.7  | 0.18 | 0.61 |
| <br>$C_{13}H_{24}N_2O_2$  | tDHU | C10 | 2361822-74-2 |              | 0.37 | 0.77 | 0.44 | 0.82 |
| <br>$C_{13}H_{20}N_2O_2$ | tDHU | C11 | 108467-99-8  | MFCD01317800 | 0.33 | 0.73 | 0.33 | 0.75 |
| <br>$C_{13}H_{20}N_2O_2$ | tDHU | C12 | 137102-30-8  | MFCD09885895 | 0.15 | 0.58 | 0.32 | 0.76 |

|                                                                                                               |      |     |              |              |      |      |      |      |
|---------------------------------------------------------------------------------------------------------------|------|-----|--------------|--------------|------|------|------|------|
| 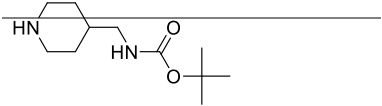<br>$C_{11}H_{22}N_2O_2$     | tDHU | D01 | 135632-53-0  | MFCD01631214 | 0.46 | 0.85 | 0.42 | 0.85 |
| <br>$C_{10}H_{18}F_2N_2O_2$  | tDHU | D02 | 2055848-76-3 | MFCD30531337 | 0.35 | 0.75 | 0.2  | 0.69 |
| <br>$C_{10}H_{18}F_2N_2O_2$  | tDHU | D03 | 1932109-72-2 | MFCD30097677 | 0.00 | 0.00 | 0.05 | 0.14 |
| <br>$C_{10}H_{18}F_2N_2O_2$ | tDHU | D04 | 2089320-98-7 |              | 0.00 | 0.00 | 0.00 | 0.00 |
| <br>$C_{11}H_{22}N_2O_3$   | tDHU | D05 | 203186-96-3  | MFCD11845683 | 0.24 | 0.43 | 0.33 | 0.56 |
| <br>$C_{15}H_{28}N_2O_2$   | tDHU | D06 | 171049-35-7  | MFCD02179169 | 0.2  | 0.48 | 0.24 | 0.51 |

|                                                                                                                            |      |     |              |              |      |      |      |      |
|----------------------------------------------------------------------------------------------------------------------------|------|-----|--------------|--------------|------|------|------|------|
| 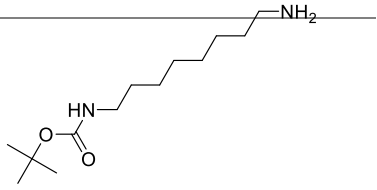 <p><math>C_{13}H_{28}N_2O_2</math></p>   | tDHU | D07 | 88829-82-7   | MFCD02094499 | 0.41 | 0.89 | 0.38 | 0.86 |
|  <p><math>C_{12}H_{24}N_2O_2</math></p>   | tDHU | D08 | 1312762-44-9 | MFCD26954785 | 0.00 | 0.00 | 0.00 | 0.00 |
|  <p><math>C_{11}H_{20}N_2O_3</math></p>   | tDHU | D09 | 2241138-06-5 |              | 0.1  | 0.37 | 0.26 | 0.68 |
|  <p><math>C_{11}H_{20}N_2O_3</math></p>  | tDHU | D10 | 1251002-01-3 | MFCD14581204 | 0.00 | 0.00 | 0.00 | 0.00 |
|  <p><math>C_{12}H_{22}N_2O_2</math></p> | tDHU | D11 | 1784225-34-8 |              | 0.2  | 0.67 | 0.06 | 0.19 |
|  <p><math>C_{12}H_{22}N_2O_2</math></p> | tDHU | D12 |              |              | 0.37 | 0.84 | 0.41 | 0.83 |

|                                                                                                                                                        |      |     |              |              |      |      |      |      |
|--------------------------------------------------------------------------------------------------------------------------------------------------------|------|-----|--------------|--------------|------|------|------|------|
| 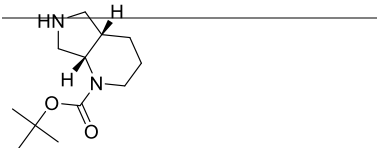 <p style="text-align: center;"><math>C_{12}H_{22}N_2O_2</math></p>   | tDHU | E01 | 159991-07-8  | MFCD11973767 | 0.31 | 0.7  | 0.19 | 0.56 |
|  <p style="text-align: center;"><math>C_{12}H_{22}N_2O_2</math></p>   | tDHU | E02 | 1277168-52-1 | MFCD22394610 | 0.37 | 0.8  | 0.44 | 0.77 |
|  <p style="text-align: center;"><math>C_{12}H_{22}N_2O_2</math></p>   | tDHU | E03 | 1251002-00-2 | MFCD14581197 | 0.28 | 0.68 | 0.28 | 0.68 |
|  <p style="text-align: center;"><math>C_{12}H_{22}N_2O_2</math></p>  | tDHU | E04 | 896464-16-7  | MFCD09839640 | 0.37 | 0.75 | 0.25 | 0.63 |
|  <p style="text-align: center;"><math>C_{10}H_{22}N_2O_3</math></p> | tDHU | E05 | 436857-02-2  | MFCD24465872 | 0.41 | 0.84 | 0.33 | 0.79 |
|  <p style="text-align: center;"><math>C_{10}H_{20}N_2O_3</math></p> | tDHU | E06 | 898271-41-5  | MFCD24637702 | 0.42 | 0.89 | 0.47 | 0.91 |



|                                                                                                             |      |     |              |              |      |      |      |      |
|-------------------------------------------------------------------------------------------------------------|------|-----|--------------|--------------|------|------|------|------|
| 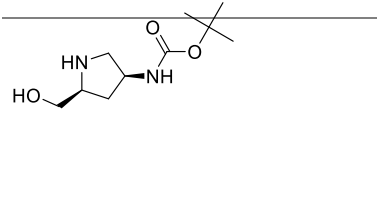<br>$C_{10}H_{20}N_2O_3$   | tDHU | E07 | 663948-85-4  | MFCD08704519 | 0.25 | 0.67 | 0.32 | 0.74 |
| <br>$C_{10}H_{20}N_2O_3$   | tDHU | E08 | 1217975-63-7 | MFCD08704528 | 0.25 | 0.7  | 0.19 | 0.67 |
| <br>$C_9H_{17}N_3O_3$      | tDHU | E09 | 1254120-14-3 | MFCD21842621 | 0.08 | 0.36 | 0.03 | 0.24 |
| <br>$C_{11}H_{22}N_2O_2$  | tDHU | E10 |              |              | 0.56 | 0.95 | 0.42 | 0.86 |
| <br>$C_{11}H_{22}N_2O_2$ | tDHU | E11 | 177906-48-8  | MFCD03001719 | 0.27 | 0.72 | 0.25 | 0.75 |
| <br>$C_{11}H_{22}N_2O_2$ | tDHU | E12 | 1408057-41-9 | MFCD23106103 | 0.00 | 0.00 | 0.19 | 0.61 |

|                                                                                                             |      |     |              |              |      |      |      |      |
|-------------------------------------------------------------------------------------------------------------|------|-----|--------------|--------------|------|------|------|------|
| 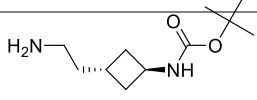<br>$C_{11}H_{22}N_2O_2$   | tDHU | F01 |              |              | 0.14 | 0.28 | 0.00 | 0.00 |
| <br>$C_{11}H_{22}N_2O_2$   | tDHU | F02 | 309915-46-6  | MFCD06797728 | 0.31 | 0.68 | 0.36 | 0.75 |
| <br>$C_{11}H_{22}N_2O_2$   | tDHU | F03 | 879275-33-9  | MFCD03093384 | 0.38 | 0.82 | 0.28 | 0.73 |
| <br>$C_{11}H_{20}N_2O_2$  | tDHU | F04 | 1250997-08-0 | MFCD20231336 | 0.2  | 0.76 | 0.3  | 0.85 |
| <br>$C_{11}H_{20}N_2O_2$ | tDHU | F05 |              |              | 0.81 | 0.89 | 0.00 | 0.89 |
| <br>$C_{11}H_{20}N_2O_2$ | tDHU | F06 |              |              | 0.21 | 0.85 | 0.22 | 0.88 |

|                                                                                                                            |      |     |              |              |      |      |      |      |
|----------------------------------------------------------------------------------------------------------------------------|------|-----|--------------|--------------|------|------|------|------|
| 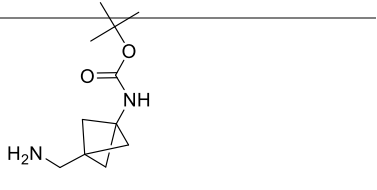 <p><math>C_{11}H_{20}N_2O_2</math></p>   | tDHU | F07 | 1638765-05-5 | MFCD27987305 | 0.46 | 0.9  | 0.38 | 0.82 |
|  <p><math>C_9H_{20}N_2O_3</math></p>      | tDHU | F08 |              |              | 0.32 | 0.66 | 0.31 | 0.61 |
|  <p><math>C_{10}H_{22}N_2O_2</math></p>   | tDHU | F09 | 144222-23-1  | MFCD03001681 | 0.53 | 0.91 | 0.39 | 0.91 |
|  <p><math>C_{10}H_{22}N_2O_2</math></p>  | tDHU | F10 | 123183-72-2  | MFCD14155832 | 0.36 | 0.75 | 0.35 | 0.74 |
|  <p><math>C_{10}H_{22}N_2O_2</math></p> | tDHU | F11 | 134597-95-8  | MFCD14529626 | 0.04 | 0.18 | 0.00 | 0.00 |
|  <p><math>C_{10}H_{22}N_2O_2</math></p> | tDHU | F12 | 869901-70-2  | MFCD18909493 | 0.32 | 0.69 | 0.32 | 0.39 |

|                                                                                                             |      |     |              |              |      |      |      |      |
|-------------------------------------------------------------------------------------------------------------|------|-----|--------------|--------------|------|------|------|------|
| 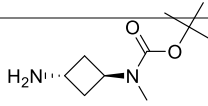<br>$C_{10}H_{20}N_2O_2$   | tDHU | G01 | 1392803-14-3 | MFCD23106178 | 0.12 | 0.45 | 0.28 | 0.75 |
| <br>$C_{10}H_{20}N_2O_2$   | tDHU | G02 | 586961-34-4  | MFCD11040590 | 0.32 | 0.77 | 0.23 | 0.65 |
| <br>$C_{10}H_{20}N_2O_2$   | tDHU | G03 | 119020-01-8  | MFCD03419257 | 0.25 | 0.48 | 0.44 | 0.59 |
| <br>$C_{10}H_{20}N_2O_2$  | tDHU | G04 | 173340-25-5  | MFCD06796615 | 0.46 | 0.85 | 0.36 | 0.75 |
| <br>$C_{10}H_{20}N_2O_2$ | tDHU | G05 | 73874-95-0   | MFCD00798171 | 0.38 | 0.83 | 0.28 | 0.78 |
| <br>$C_{10}H_{20}N_2O_2$ | tDHU | G06 |              |              | 0.4  | 0.78 | 0.44 | 0.84 |

|                                                                                                             |      |     |              |              |      |      |      |      |
|-------------------------------------------------------------------------------------------------------------|------|-----|--------------|--------------|------|------|------|------|
| 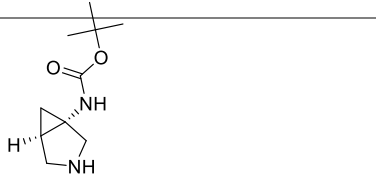<br>$C_{10}H_{18}N_2O_2$   | tDHU | G07 | 181941-45-7  | MFCD18431936 | 0.41 | 0.86 | 0.45 | 0.87 |
| <br>$C_9H_{20}N_2O_2$      | tDHU | G08 | 170367-69-8  | MFCD06804538 | 0.17 | 0.6  | 0.4  | 0.82 |
| <br>$C_9H_{18}N_2O_2$      | tDHU | G09 |              |              | 0.46 | 0.83 | 0.42 | 0.85 |
| <br>$C_{12}H_{24}N_2O_2$  | tDHU | G10 | 192323-07-2  | MFCD06657670 | 0.54 | 0.93 | 0.53 | 0.92 |
| <br>$C_8H_{18}N_2O_2$    | tDHU | G11 | 146552-71-8  | MFCD08726031 | 0.38 | 0.79 | 0.33 | 0.73 |
| <br>$C_{14}H_{26}N_2O_2$ | tDHU | G12 | 1160247-15-3 | MFCD12198554 | 0.45 | 0.88 | 0.45 | 0.92 |

|                                                                                                            |      |     |             |              |      |      |      |      |
|------------------------------------------------------------------------------------------------------------|------|-----|-------------|--------------|------|------|------|------|
| 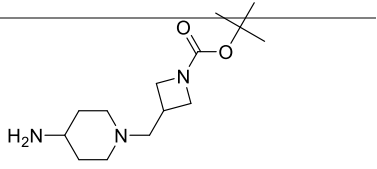<br>$C_{14}H_{27}N_3O_2$  | tDHU | H01 |             |              | 0.34 | 0.81 | 0.5  | 0.8  |
| <br>$C_{15}H_{29}N_3O_2$  | tDHU | H02 | 381722-48-1 |              | 0.28 | 0.74 | 0.38 | 0.79 |
| <br>$C_{18}H_{29}N_5O_3$  | tDHU | H03 |             |              | 0.27 | 0.79 | 0.37 | 0.83 |
| <br>$C_{15}H_{25}N_5O_3$ | tDHU | H04 |             |              | 0.22 | 0.56 | 0.18 | 0.58 |
| <br>$C_9H_{20}N_2O_2$   | tDHU | H05 | 68076-36-8  | MFCD00210019 | 0.37 | 0.71 | 0.35 | 0.85 |
| <br>$C_9H_{20}N_2O_3$   | tDHU | H06 | 127828-22-2 | MFCD12031501 | 0.47 | 0.91 | 0.4  | 0.87 |

|                                                                                                                                                      |      |     |             |              |     |      |      |      |
|------------------------------------------------------------------------------------------------------------------------------------------------------|------|-----|-------------|--------------|-----|------|------|------|
| 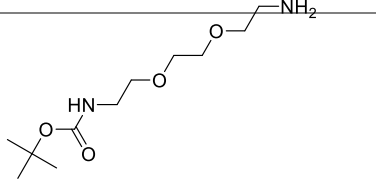 <p data-bbox="256 426 365 449"><math>C_{11}H_{24}N_2O_4</math></p> | tDHU | H07 | 153086-78-3 | MFCD03788155 | 0.5 | 0.91 | 0.49 | 0.89 |
|------------------------------------------------------------------------------------------------------------------------------------------------------|------|-----|-------------|--------------|-----|------|------|------|
